# Supplementary material for: Analysis of Alternative mRNA Splicing in Vemurafenib-Resistant Melanoma Cells
Source: Biomolecules. 2022 Jul 17;12(7):993. doi: 10.3390/biom12070993 (PMC9312936; doi:10.3390/biom12070993)
Supplement: Supplementary file 1 [file biomolecules-12-00993-s001.zip]

Archive with 9 entries (9 files):
- Supplemental Figures Legends.pdf
- Supplemental Figures.pdf
- Supplemental Materials and Methods.pdf
- Table S1 - Differentially expressed genes.xlsx
- Table S2 - Differentially expressed spliceosome genes.xlsx
- Table S3 - BRAF interactome MS data.xlsx
- Table S4 - Splicing events.xlsx
- Table S5 - RT-PCR primers sequences.pdf
- Table S6 - IPA-comparison-canonical pathway enrichment for AS tools .xlsx
