# Supplementary material for: Analysis of Alternative mRNA Splicing in Vemurafenib-Resistant Melanoma Cells
Source: Biomolecules. 2022 Jul 17;12(7):993. doi: 10.3390/biom12070993 (PMC9312936; doi:10.3390/biom12070993)
Supplement: Supplementary file 1 [file biomolecules-12-00993-s001.zip › Table S1 - Differentially expressed genes.xlsx]

## Sheet: Description
Supplemental table S1 Differential gene expression analysis was performed on BioJupies web platform (https://amp.pharm.mssm.edu/biojupies/). See Materials and Methods section 2.9. Diffenetial Gene Expression data are presented without cut-offs. Cut-offs of adjusted p-value < 0.05 and log2 fold change > 1 were applied. Fore each gene data are presented for: Gene Symbol LogFoldChange Expression Lev…

## Sheet: Differenta Expression-BioJupies
Gene Symbol	logFoldChange (Resistant vs Parental)	Average Expression	t statistic	P Value	adjusted P Value	B statistic
TYRP1	2.84361	10.9056	72.9413	1.46265e-14	1.29818e-10	24.0326
UCHL1	7.82471	4.81846	70.323	2.08025e-14	1.29818e-10	23.3311
CYSLTR2	7.47693	2.24564	68.1383	2.81947e-14	1.29818e-10	21.597
EPHB4	3.11455	4.05662	54.0654	2.61571e-13	3.43587e-10	21.031
AATK	3.30313	4.18339	53.9479	2.67109e-13	3.43587e-10	21.0436
EMILIN2	1.99335	7.67628	53.9251	2.68197e-13	3.43587e-10	21.2821
GPR143	3.00098	5.8503	45.8184	1.28503e-12	1.36539e-09	19.7333
GALNT14	3.62758	1.90153	40.0406	4.69057e-12	3.59949e-09	17.9004
HLA-G	6.93407	-0.227086	39.1581	5.80934e-12	4.12091e-09	16.5665
PLEKHA6	3.6225	2.71684	37.9474	7.85234e-12	4.5844e-09	17.7209
NCAM2	5.64433	0.585098	36.2434	1.22e-11	6.01852e-09	16.5813
HTRA3	8.13576	3.27996	35.8934	1.33893e-11	6.37748e-09	17.3346
SERPINF1	3.3318	5.57669	35.523	1.47893e-11	6.80951e-09	17.2934
RCN1	1.31	8.50516	34.2658	2.08882e-11	9.30739e-09	16.8885
CFAP61	1.85866	6.2516	34.1208	2.17542e-11	9.39034e-09	16.8828
HIST1H1C	3.21908	5.86698	33.8256	2.36426e-11	9.56908e-09	16.8064
ARMCX2	2.94755	3.15666	33.7366	2.42466e-11	9.56908e-09	16.7603
MAPK4	1.23303	7.49899	32.7363	3.23467e-11	1.20758e-08	16.4446
CYP27A1	5.48714	2.27351	32.0773	3.92975e-11	1.39184e-08	16.1878
GAGE2A	5.21702	1.84638	31.9196	4.11955e-11	1.42258e-08	16.0602
SEMA6D	2.95998	3.67071	31.2839	4.99378e-11	1.56771e-08	16.089
SVIP	1.4303	5.52139	30.4264	6.51425e-11	1.92981e-08	15.7691
MYEOV	2.00114	3.64662	30.3128	6.75149e-11	1.92981e-08	15.7891
NEFL	3.72697	1.71654	30.0495	7.33865e-11	2.02738e-08	15.5213
P4HA3	1.60112	5.02683	29.9781	7.50741e-11	2.03333e-08	15.6407
FAM20A	1.71195	3.84151	29.6576	8.31979e-11	2.21003e-08	15.5784
FAM131A	2.02508	4.91353	28.8414	1.08617e-10	2.58678e-08	15.263
CDH3	1.41617	5.12443	28.7398	1.1234e-10	2.62531e-08	15.2185
RAB11FIP4	1.42801	4.79847	28.6771	1.14707e-10	2.62531e-08	15.2118
CYGB	6.32167	2.14998	28.5457	1.1985e-10	2.65861e-08	15.1417
GPR158	2.56683	4.1264	27.9234	1.47916e-10	3.04951e-08	14.9834
ANGPTL2	1.25272	6.84337	27.6175	1.64314e-10	3.28938e-08	14.7514
OCIAD2	2.98266	3.18937	27.4215	1.7587e-10	3.3797e-08	14.8339
SLC45A2	1.43109	7.20884	27.4166	1.76166e-10	3.3797e-08	14.6664
FAM78A	1.51988	4.47016	27.2808	1.84713e-10	3.49512e-08	14.7357
GAGE13	4.80736	4.25277	26.5397	2.4019e-10	4.06957e-08	14.4769
H2AFJ	2.0803	5.6014	26.4301	2.49858e-10	4.12868e-08	14.3584
SEZ6L2	2.67847	2.56759	26.4166	2.51074e-10	4.12868e-08	14.4686
RASGEF1A	1.75839	3.31914	25.9001	3.03061e-10	4.60413e-08	14.2861
LSR	2.20334	4.89386	25.7941	3.15133e-10	4.73145e-08	14.1526
SV2A	2.17604	3.16032	25.6797	3.28756e-10	4.82359e-08	14.2078
ZSCAN12	3.35578	1.38389	25.5726	3.42105e-10	4.82359e-08	14.0689
CPT1C	2.47962	1.74994	25.5325	3.47257e-10	4.82359e-08	14.0984
ALDH1L2	3.22326	0.645386	25.4155	3.62784e-10	4.96152e-08	13.8819
BCL2A1	4.21396	2.33476	25.1397	4.02492e-10	5.34579e-08	13.9982
DMBT1	1.74817	4.48517	24.764	4.64515e-10	5.96565e-08	13.7738
MANEAL	1.59735	4.18711	24.1893	5.80758e-10	6.75416e-08	13.5635
TPSG1	3.39782	3.8508	24.1845	5.81876e-10	6.75416e-08	13.5881
FBLN5	2.593	1.59519	24.0909	6.03729e-10	6.89199e-08	13.5604
CCDC171	1.27426	4.8936	24.0122	6.22791e-10	7.05132e-08	13.4357
SLC5A10	2.48837	3.06145	23.9127	6.47876e-10	7.21702e-08	13.525
OAS2	1.74496	4.24805	23.7539	6.90222e-10	7.5667e-08	13.378
STOM	0.888534	8.60549	23.467	7.74694e-10	8.16859e-08	13.0562
HIST1H2BK	1.92971	3.84827	23.4138	7.91597e-10	8.28358e-08	13.2686
KCNQ2	5.73129	-3.39217	23.2072	8.61103e-10	8.68206e-08	11.6031
MAGEA3	1.11865	6.18389	23.0726	9.10015e-10	9.0342e-08	12.9561
PCSK9	2.57926	2.31565	23.0576	9.15651e-10	9.0342e-08	13.1885
NUPR1	2.68446	3.49745	22.9626	9.52238e-10	9.06434e-08	13.1055
HSPB8	1.25061	7.2869	22.9383	9.6187e-10	9.06434e-08	12.8535
B3GAT1	1.37338	3.53552	22.844	1.00023e-09	9.25039e-08	13.0517
IQCE	0.917874	8.18787	22.7533	1.03873e-09	9.37187e-08	12.7486
TBL1X	2.54667	3.37848	22.7392	1.04486e-09	9.37187e-08	13.0186
SLC37A2	1.45199	5.97103	22.4092	1.20031e-09	1.04276e-07	12.6715
ADAM8	3.79438	-0.52763	22.3261	1.24336e-09	1.0734e-07	12.534
ZNF83	2.65579	2.09319	22.2836	1.26605e-09	1.08621e-07	12.8651
HYOU1	0.811579	9.13152	22.2438	1.2877e-09	1.09461e-07	12.5012
MET	2.56754	4.76427	22.2038	1.30986e-09	1.09669e-07	12.6588
MB21D1	2.77107	1.42325	22.2035	1.31002e-09	1.09669e-07	12.807
SCUBE1	2.35881	2.1907	22.1756	1.32572e-09	1.09693e-07	12.82
WWC3	4.75788	2.20679	22.057	1.39489e-09	1.1401e-07	12.7694
PHYHD1	4.23228	-0.37436	21.9788	1.44261e-09	1.17216e-07	12.4465
MMACHC	1.76151	4.8572	21.9593	1.45482e-09	1.17517e-07	12.5399
BCHE	2.09269	3.66007	21.91	1.48616e-09	1.19351e-07	12.6292
RP11-119J18.1	1.2697	3.73786	21.8133	1.54977e-09	1.19674e-07	12.578
TM4SF1	0.971717	6.05894	21.8117	1.55083e-09	1.19674e-07	12.3925
C1QTNF5	2.84983	1.52134	21.7319	1.60564e-09	1.21861e-07	12.6157
ZNF614	2.40308	2.06451	21.6156	1.68942e-09	1.24791e-07	12.5785
FTO	0.963559	8.43198	21.436	1.82832e-09	1.32812e-07	12.1358
RP11-404F10.6	4.88825	-3.81609	21.426	1.83647e-09	1.32812e-07	10.9348
HIST1H2AC	1.35409	4.72005	21.2521	1.9838e-09	1.39807e-07	12.2218
CTNND2	1.32734	4.45764	21.0944	2.12871e-09	1.4702e-07	12.1714
LMO4	1.11028	6.10232	20.9178	2.30494e-09	1.57615e-07	11.9653
TWIST1	1.26744	5.37951	20.8792	2.34554e-09	1.59601e-07	11.993
CACNB4	3.81311	0.818972	20.8532	2.37338e-09	1.59919e-07	12.1933
DENND2D	0.872337	6.27907	20.7519	2.48531e-09	1.65046e-07	11.8752
TPPP	1.31831	4.74527	20.6191	2.64089e-09	1.71206e-07	11.9151
FAM19A5	1.5978	4.0305	20.6082	2.65407e-09	1.71206e-07	11.9821
ATP1A1	0.743261	11.5309	20.4957	2.79509e-09	1.7792e-07	11.6352
PID1	2.5402	3.6536	20.4509	2.85345e-09	1.79976e-07	11.9471
ZNF439	2.22123	1.2917	20.2228	3.17261e-09	1.91368e-07	11.9432
DNAJC12	4.94391	-1.52376	20.2078	3.19496e-09	1.91492e-07	11.4787
CYP4V2	1.15039	3.93347	20.1918	3.21889e-09	1.91649e-07	11.789
ABCB5	1.26598	5.13392	20.0632	3.41914e-09	2.01832e-07	11.6076
FAM111A	1.51558	3.88352	20.051	3.43888e-09	2.02133e-07	11.7249
THBS2	3.4943	1.50258	19.9929	3.53448e-09	2.06872e-07	11.8421
CPN2	1.29178	4.42219	19.9839	3.54956e-09	2.06878e-07	11.6319
GLRB	5.34893	-3.58734	19.9091	3.67751e-09	2.11656e-07	10.593
HMGB3	0.82191	7.4008	19.6471	4.16733e-09	2.33997e-07	11.2721
CALHM2	2.61464	2.11665	19.594	4.27504e-09	2.37153e-07	11.6452
SAMD9L	2.72096	0.114422	19.5466	4.37392e-09	2.40705e-07	11.5444
PNLIPRP3	1.85726	2.95345	19.437	4.61225e-09	2.48863e-07	11.5157
RELN	2.64949	2.51999	19.4098	4.67356e-09	2.4925e-07	11.5345
BRSK2	1.47638	2.73078	19.3828	4.73527e-09	2.51571e-07	11.5064
LIPE	1.11087	4.69265	19.3221	4.87733e-09	2.57139e-07	11.2653
ZNF829	3.67186	-0.741291	19.2832	4.97095e-09	2.59251e-07	11.2935
VPS11	0.973917	6.05904	19.2821	4.97368e-09	2.59251e-07	11.1411
TDRD3	0.989661	5.2994	19.2567	5.0358e-09	2.61502e-07	11.1803
TSPAN10	1.47818	6.56363	19.2268	5.11025e-09	2.62387e-07	11.0863
ACSL5	2.04927	2.40831	19.2159	5.13742e-09	2.62387e-07	11.4442
ARHGAP45	1.87276	3.99775	19.2159	5.13745e-09	2.62387e-07	11.2866
ZDHHC11B	2.57048	2.21976	19.0612	5.54419e-09	2.7848e-07	11.3765
SLCO1B1	5.1528	-3.68218	18.9764	5.78223e-09	2.87302e-07	10.2482
PRMT6	1.00799	5.06484	18.9577	5.83622e-09	2.88597e-07	11.0402
FRG2C	5.48168	-3.51983	18.8778	6.07293e-09	2.97466e-07	10.2841
SC5D	0.961345	6.46799	18.8553	6.14148e-09	2.98705e-07	10.8924
PLEKHG4	1.1262	6.23038	18.7405	6.50525e-09	3.11508e-07	10.8421
HIST1H2BJ	1.61307	2.27162	18.7224	6.56458e-09	3.12678e-07	11.2009
ZNF274	1.04074	4.51684	18.7003	6.63812e-09	3.14015e-07	10.954
CD68	1.41178	6.99045	18.6087	6.95221e-09	3.24206e-07	10.7355
TSPAN9	0.884699	7.14609	18.5459	7.17683e-09	3.30445e-07	10.6945
DTX4	2.19095	1.95472	18.5276	7.24368e-09	3.32415e-07	11.1161
LRP4	1.81195	2.15693	18.5127	7.29889e-09	3.3384e-07	11.0988
ZNF585A	1.66215	1.89505	18.4949	7.36542e-09	3.34666e-07	11.1015
ZNF300	2.39619	1.6713	18.392	7.76216e-09	3.49247e-07	11.0555
GALM	6.77631	1.01787	18.331	8.00843e-09	3.57995e-07	11.0277
NCALD	0.792399	5.62593	18.2364	8.40809e-09	3.71057e-07	10.6051
FKBP10	4.40587	-2.10107	18.1876	8.62266e-09	3.7811e-07	10.5115
HPDL	1.05212	5.46187	18.1587	8.75252e-09	3.81383e-07	10.574
THSD4	1.38607	3.28369	18.1191	8.93377e-09	3.88039e-07	10.7898
ADGRE5	0.872792	5.59752	18.0975	9.03456e-09	3.88039e-07	10.5297
ZNF497	2.6343	1.08153	18.0951	9.04573e-09	3.88039e-07	10.9081
CES2	0.772159	6.31358	18.0706	9.16186e-09	3.90595e-07	10.4682
GABRG3	3.69486	-1.18689	18.0491	9.26479e-09	3.91359e-07	10.6624
HIST1H4H	2.09544	2.15817	17.9482	9.76577e-09	4.08772e-07	10.8003
MAGEA6	1.16623	5.94524	17.88	1.01216e-08	4.18591e-07	10.3825
GABRA3	1.66889	2.57026	17.8678	1.01869e-08	4.20035e-07	10.7259
RAB27A	1.05816	7.87478	17.8448	1.03107e-08	4.23874e-07	10.2786
ASNS	1.52679	3.69419	17.694	1.1166e-08	4.49668e-07	10.5011
ZNF35	2.90612	1.63127	17.6841	1.12247e-08	4.50718e-07	10.6838
MAGEA1	0.90922	6.24198	17.6529	1.14127e-08	4.55616e-07	10.2346
CHST11	0.74019	6.9431	17.6294	1.15559e-08	4.60003e-07	10.1881
SH2B3	1.12556	7.22599	17.4251	1.28916e-08	4.97408e-07	10.0576
EI24	0.710586	6.9443	17.4112	1.29887e-08	4.98368e-07	10.0615
TPP1	0.678917	7.78519	17.3747	1.32465e-08	5.04367e-07	10.0094
HPGD	1.23328	4.38428	17.3288	1.35793e-08	5.09704e-07	10.2032
SORD	0.827206	7.15416	17.3166	1.36696e-08	5.11702e-07	9.99708
ATP2A3	1.27536	3.72591	17.2524	1.41539e-08	5.25558e-07	10.2447
AHCYL1	0.89277	8.82483	17.165	1.48437e-08	5.46482e-07	9.86363
GAGE12F	2.56092	2.69124	17.1562	1.49152e-08	5.46482e-07	10.3173
GAGE12G	2.56092	2.69124	17.1562	1.49152e-08	5.46482e-07	10.3173
PYGL	0.617198	9.41723	17.1306	1.51253e-08	5.51793e-07	9.83234
CAPG	1.44221	9.3965	17.1012	1.53707e-08	5.58726e-07	9.81523
UNC13D	1.54818	5.32991	17.0921	1.54481e-08	5.60064e-07	9.97197
PAM	1.10638	8.78948	17.0786	1.55623e-08	5.61258e-07	9.81302
SMIM10	1.54628	2.23926	17.0151	1.61153e-08	5.78185e-07	10.2779
SPP1	0.929288	4.14591	16.984	1.63936e-08	5.8399e-07	10.0312
TRIM63	0.680613	7.2826	16.9211	1.69735e-08	6.00457e-07	9.75726
PAK1	0.984238	3.9585	16.9156	1.70255e-08	6.00457e-07	10.0157
SLC39A8	1.2808	5.61632	16.914	1.70404e-08	6.00457e-07	9.84391
STEAP1B	1.21461	3.01377	16.9072	1.71047e-08	6.0119e-07	10.1382
UNG	0.743772	6.19469	16.8941	1.72292e-08	6.04029e-07	9.79206
CHRNB2	1.78314	2.30396	16.8755	1.74075e-08	6.08734e-07	10.1926
RINT1	0.882457	6.34191	16.8597	1.75614e-08	6.12566e-07	9.76334
PTPRU	0.725241	8.63083	16.7492	1.86758e-08	6.4012e-07	9.61821
RANBP10	0.830265	6.69604	16.6192	2.0089e-08	6.76487e-07	9.60055
FSTL5	2.56161	2.01557	16.5461	2.09334e-08	6.93413e-07	10.0247
ZDHHC11	2.10079	1.43804	16.3835	2.29585e-08	7.37503e-07	9.96454
TMEM233	1.35252	3.80312	16.3573	2.33052e-08	7.4571e-07	9.70207
CYBA	2.98799	-0.876652	16.3371	2.3576e-08	7.5209e-07	9.86924
SAMHD1	1.03564	4.54555	16.3079	2.39725e-08	7.61224e-07	9.57362
DAGLA	1.11612	3.73661	16.2942	2.41621e-08	7.63732e-07	9.67317
ZBTB7C	3.03411	-0.277449	16.2545	2.47182e-08	7.79528e-07	9.87888
ADGRA2	1.94061	2.06663	16.234	2.50113e-08	7.86973e-07	9.83653
GPR157	1.04055	5.10122	16.1972	2.55469e-08	8.00788e-07	9.44841
C1orf115	1.05472	3.84263	16.1634	2.60507e-08	8.14114e-07	9.57739
GREB1L	1.89908	1.24053	16.1306	2.655e-08	8.26134e-07	9.8252
VAV3	2.00162	3.89035	16.1303	2.65549e-08	8.26134e-07	9.55008
GRK5	0.827635	4.88258	16.1156	2.67806e-08	8.31282e-07	9.41765
BAG1	0.79756	5.72381	16.1041	2.69601e-08	8.31908e-07	9.33988
ANO5	3.19019	-0.340903	16.1027	2.69815e-08	8.31908e-07	9.79107
MOSPD1	0.917785	3.9639	16.076	2.7404e-08	8.43054e-07	9.50581
EPHA4	2.2023	2.06442	16.0605	2.7652e-08	8.48794e-07	9.73262
CCDC163P	1.79731	2.00184	16.0524	2.77817e-08	8.4948e-07	9.73291
HNRNPLP2	3.10514	-1.20037	15.9161	3.00817e-08	9.13227e-07	9.60685
FAM213A	0.695506	7.14406	15.8996	3.03745e-08	9.1808e-07	9.13195
ATP6V0D2	0.680515	6.51973	15.8822	3.06876e-08	9.2552e-07	9.14982
HMGN5	1.19893	4.99168	15.8677	3.09498e-08	9.31393e-07	9.25117
ADCY2	0.90137	4.70278	15.8446	3.13726e-08	9.3617e-07	9.26579
ACAD8	0.838259	4.95546	15.7162	3.38445e-08	9.97342e-07	9.15813
ZNF304	1.10177	3.06998	15.7153	3.38633e-08	9.97342e-07	9.40945
SHANK2	1.27075	5.72727	15.6909	3.43562e-08	1.00971e-06	9.0773
GSTM2	2.19417	1.93644	15.6711	3.47627e-08	1.01517e-06	9.50585
ZNF610	4.0759	-1.26311	15.6519	3.51635e-08	1.01827e-06	9.4564
IFI16	0.625761	7.44989	15.5891	3.65054e-08	1.04833e-06	8.92007
TTC17	0.775798	5.75303	15.5625	3.709e-08	1.05417e-06	8.99244
NBPF15	0.801758	5.71742	15.5471	3.74345e-08	1.0596e-06	8.98516
ZNF331	1.64643	2.9011	15.4526	3.962e-08	1.10337e-06	9.26543
CXADR	1.77393	2.57164	15.403	4.08234e-08	1.13232e-06	9.27419
PPP1R18	0.887507	5.54062	15.3811	4.13671e-08	1.1451e-06	8.89094
ODC1	0.682278	7.05698	15.3645	4.17854e-08	1.15436e-06	8.78966
GATM	1.45645	2.42482	15.3595	4.19125e-08	1.15556e-06	9.26324
ANO2	3.10085	-1.64657	15.3202	4.29241e-08	1.17641e-06	9.22549
NAP1L5	0.974344	4.53055	15.2706	4.42397e-08	1.20529e-06	8.91558
NMRK2	2.20062	2.63154	15.1755	4.68857e-08	1.26738e-06	9.12121
NUSAP1	0.597135	7.82403	15.1667	4.71376e-08	1.26922e-06	8.63065
ITGA7	1.05229	6.04657	15.0874	4.94922e-08	1.31976e-06	8.65849
STAG3	0.96512	3.71019	15.0709	4.99963e-08	1.33062e-06	8.89948
STK26	4.23883	1.20014	15.0678	5.0092e-08	1.33062e-06	9.18015
SPPL2A	0.711409	6.13393	15.042	5.08986e-08	1.34429e-06	8.62241
ZFP82	1.37056	2.60774	15.0114	5.18701e-08	1.36733e-06	9.01754
IGFBP3	2.01757	1.77043	14.9942	5.24239e-08	1.3793e-06	9.09337
ELF4	1.17455	2.3752	14.9507	5.38573e-08	1.40587e-06	9.00544
ZNF615	1.67795	2.16489	14.9413	5.41741e-08	1.40659e-06	9.02219
TMEM50B	0.648049	5.45948	14.9124	5.51561e-08	1.41875e-06	8.58611
DUT	0.676571	7.27744	14.9082	5.53024e-08	1.41987e-06	8.47563
ZNF702P	4.82368	-1.38069	14.8212	5.83881e-08	1.47443e-06	8.97666
VBP1	0.605309	6.06537	14.7754	6.00886e-08	1.50636e-06	8.44681
ZNF649	3.03667	1.41898	14.7654	6.04672e-08	1.5131e-06	8.97284
NRG2	1.44273	2.14051	14.7199	6.22241e-08	1.54865e-06	8.87965
PKDCC	2.43755	0.294128	14.7001	6.30075e-08	1.55972e-06	8.97997
PIK3AP1	2.10591	0.873792	14.6629	6.45038e-08	1.58822e-06	8.93914
KRT89P	1.03347	3.78823	14.66	6.46227e-08	1.58831e-06	8.61213
VDR	0.768344	5.59216	14.6283	6.59348e-08	1.61196e-06	8.38193
ARHGAP29	2.1975	3.91033	14.6053	6.69004e-08	1.63268e-06	8.5562
CDKN1C	1.11042	4.22969	14.5849	6.77726e-08	1.64524e-06	8.49561
RAP1GAP	0.93953	4.75071	14.5536	6.91393e-08	1.67254e-06	8.40769
ZNF542P	2.55431	1.80255	14.5431	6.96021e-08	1.68079e-06	8.79582
GSPT2	1.10875	3.33976	14.5272	7.03103e-08	1.69493e-06	8.59266
UBL4A	0.710733	6.7044	14.5164	7.07951e-08	1.70365e-06	8.23371
PCDHGA7	3.48805	-1.95233	14.4964	7.17057e-08	1.71957e-06	8.72137
PTPRN2	1.77007	1.75075	14.4796	7.24805e-08	1.73213e-06	8.75831
FNDC1	1.58426	2.85989	14.4678	7.30313e-08	1.74228e-06	8.62275
SYT5	1.94124	2.35707	14.4099	7.57923e-08	1.79574e-06	8.64804
GCNT3	2.04537	0.770755	14.3875	7.68954e-08	1.81876e-06	8.76528
CLEC2B	1.59458	1.9962	14.3604	7.82491e-08	1.8384e-06	8.65469
DPYSL2	0.639487	6.10599	14.346	7.89759e-08	1.85211e-06	8.14755
CEP131	0.700566	5.78341	14.3357	7.95033e-08	1.86008e-06	8.16386
NT5C2	0.653752	5.54364	14.3341	7.95849e-08	1.86008e-06	8.18193
ACACB	1.16731	4.50086	14.3096	8.08566e-08	1.88026e-06	8.26866
ZNF320	1.5509	3.09671	14.2925	8.17552e-08	1.88876e-06	8.46886
FAM127C	8.17649	-1.46731	14.2893	8.19277e-08	1.88876e-06	8.65397
ALX1	0.864162	4.04389	14.2871	8.20427e-08	1.88876e-06	8.31661
ZNF671	1.61707	2.0693	14.2349	8.48705e-08	1.94092e-06	8.56186
MYLK3	1.8818	2.24817	14.2033	8.66293e-08	1.95958e-06	8.52017
ZNF486	3.28171	0.422903	14.1929	8.72192e-08	1.96535e-06	8.65119
GNB5	0.64559	5.15404	14.1638	8.88914e-08	1.99487e-06	8.09552
NECTIN1	0.680975	5.2496	14.153	8.95209e-08	1.99766e-06	8.07936
RAB3IP	1.02104	3.17531	14.1471	8.98689e-08	2.00077e-06	8.35604
EOMES	2.32135	-0.431191	14.1457	8.99499e-08	2.00077e-06	8.62415
ATP6AP1	0.911709	7.84558	14.1342	9.06255e-08	2.01256e-06	7.91936
CTHRC1	1.00182	4.88741	14.1275	9.10274e-08	2.01824e-06	8.09547
SCN3B	3.0662	0.20039	14.1055	9.23491e-08	2.03365e-06	8.59919
SLX4	1.0111	5.66042	14.0994	9.27196e-08	2.03615e-06	8.00683
HERC5	1.04373	3.78475	14.0849	9.36056e-08	2.04473e-06	8.21474
ARMCX5	1.28763	3.23297	14.0833	9.37026e-08	2.04473e-06	8.30249
BCAS2	0.646432	5.73921	14.0577	9.52885e-08	2.06953e-06	7.97085
SLAMF7	0.913507	4.31496	14.0518	9.56623e-08	2.07438e-06	8.11201
MPP1	0.817947	4.19715	14.0382	9.65169e-08	2.08311e-06	8.11907
NPM2	1.32033	3.15455	14.0322	9.6904e-08	2.0882e-06	8.27877
RNLS	2.79549	1.03721	14.0238	9.74407e-08	2.09323e-06	8.50791
ZNF850	1.52614	2.39914	14.0148	9.80181e-08	2.10237e-06	8.3716
ZNF589	0.783111	5.07924	13.9816	1.00188e-07	2.14226e-06	7.97287
HADHB	0.594039	7.64042	13.9684	1.01067e-07	2.15439e-06	7.80674
HIST2H2BE	2.002	2.25844	13.9543	1.02018e-07	2.16764e-06	8.34671
MAPK10	2.6988	-0.61506	13.9522	1.0216e-07	2.16764e-06	8.49532
PLXNA4	1.36938	5.4253	13.8979	1.05906e-07	2.23e-06	7.88206
ATF5	0.972825	5.08915	13.7805	1.14526e-07	2.38605e-06	7.82707
TP53I3	2.2095	1.64797	13.7376	1.1787e-07	2.44465e-06	8.26095
PEBP1	0.551729	9.33543	13.7315	1.18353e-07	2.44788e-06	7.59683
FSCN1	2.65593	0.915225	13.6753	1.22914e-07	2.52651e-06	8.27751
RASD1	1.0256	4.95304	13.669	1.23437e-07	2.53348e-06	7.75914
WSB2	0.551956	7.09462	13.6452	1.25438e-07	2.57073e-06	7.59341
ALDH9A1	0.565525	7.11685	13.6375	1.2609e-07	2.58027e-06	7.58674
PCDHGA10	1.74675	1.92818	13.6194	1.27642e-07	2.59712e-06	8.14885
CTLA4	0.944373	4.47181	13.6191	1.27666e-07	2.59712e-06	7.77904
ZNF529	1.08526	2.54573	13.5998	1.29345e-07	2.62742e-06	8.0589
SNAP25	0.785223	4.6335	13.5361	1.35066e-07	2.70386e-06	7.69732
LLNLR-285B5.1	2.19966	1.86818	13.5214	1.36421e-07	2.7231e-06	8.08553
SH3BGRL2	4.15629	0.407907	13.5123	1.37267e-07	2.73603e-06	8.19317
APOBEC3C	0.957901	4.86778	13.4857	1.39782e-07	2.77414e-06	7.63319
ASAH1	0.518011	9.8367	13.4401	1.44212e-07	2.83874e-06	7.37288
TP53INP2	0.66138	5.85478	13.4395	1.4427e-07	2.83874e-06	7.51161
SOGA3	1.67371	1.21361	13.4117	1.4705e-07	2.87706e-06	8.06969
CPS1	1.81585	3.93637	13.4011	1.48116e-07	2.88963e-06	7.69672
SNPH	0.998041	4.1726	13.3991	1.4832e-07	2.88963e-06	7.65904
RFC5	0.672434	5.52756	13.3851	1.49759e-07	2.91355e-06	7.49761
RNF114	0.543166	7.02793	13.3676	1.51569e-07	2.94048e-06	7.39074
HAS2	1.21739	4.13801	13.353	1.53103e-07	2.95482e-06	7.6299
ECM1	0.965785	7.7711	13.3506	1.53357e-07	2.95482e-06	7.34909
CHP1	0.582851	6.74699	13.3496	1.53459e-07	2.95482e-06	7.39085
ZNF140	1.21314	2.55758	13.3292	1.55631e-07	2.98575e-06	7.86093
ENSA	0.710591	7.44517	13.3178	1.56865e-07	2.99944e-06	7.3353
ZNF43	2.29808	1.61765	13.3146	1.57214e-07	2.99944e-06	7.96296
AP2A2	0.651184	6.34899	13.3022	1.58564e-07	3.01509e-06	7.37582
WLS	0.569959	6.81316	13.2948	1.59382e-07	3.01996e-06	7.34643
FAHD2B	1.16436	4.46948	13.2489	1.64523e-07	3.10425e-06	7.50512
SEMA3A	1.4647	4.2192	13.2427	1.65238e-07	3.10425e-06	7.53565
FHOD3	1.05773	5.53663	13.231	1.66589e-07	3.12225e-06	7.38126
ZNF776	0.983871	3.63354	13.2061	1.69495e-07	3.1627e-06	7.60123
CDAN1	0.65123	4.91387	13.1962	1.70665e-07	3.17673e-06	7.41219
TEX15	2.27701	2.84742	13.1855	1.71939e-07	3.17673e-06	7.71331
ZNF234	1.514	1.65828	13.1705	1.73754e-07	3.20009e-06	7.85409
ELOVL7	2.31737	-0.189986	13.1623	1.74752e-07	3.21418e-06	7.96802
STRIP1	0.717455	5.67038	13.1279	1.78995e-07	3.27478e-06	7.29219
ST7	0.600847	6.40668	13.1246	1.79414e-07	3.2781e-06	7.23832
RNF115	0.660784	5.18368	13.0887	1.83979e-07	3.34647e-06	7.30442
ZNF253	1.38373	1.77498	13.0876	1.84125e-07	3.34647e-06	7.78083
RPRD1A	0.914701	5.90342	13.0655	1.86997e-07	3.38023e-06	7.2261
XKR8	1.87107	1.76979	13.0583	1.87957e-07	3.38855e-06	7.75976
PKD1L1	1.27787	3.47592	13.0567	1.88157e-07	3.38855e-06	7.5157
ZNF844	3.08829	-0.565735	13.0536	1.88569e-07	3.39154e-06	7.89504
KIAA1456	1.31824	4.09991	13.0478	1.8934e-07	3.39634e-06	7.40641
VAMP7	0.779284	5.45704	13.0461	1.89573e-07	3.39634e-06	7.24778
FGF13	0.921541	4.09036	13.0374	1.90738e-07	3.40352e-06	7.39995
PEPD	0.768666	7.95962	13.0357	1.9096e-07	3.40352e-06	7.10529
GPX1	1.19378	7.43481	13.026	1.92274e-07	3.42252e-06	7.11421
ELOVL6	0.750088	4.35624	12.9603	2.01396e-07	3.55284e-06	7.30204
RGS12	0.568916	5.4591	12.9567	2.01918e-07	3.55751e-06	7.17914
ZNF404	2.16326	-0.408419	12.9357	2.04948e-07	3.59714e-06	7.81193
ZNF736	2.32703	2.73226	12.9147	2.08014e-07	3.63708e-06	7.52724
WIPF3	0.613063	6.16565	12.9057	2.0935e-07	3.65581e-06	7.08482
SLC7A11	1.73848	3.43378	12.8987	2.10401e-07	3.66429e-06	7.40282
TPPP3	2.11522	1.40564	12.8958	2.10832e-07	3.66429e-06	7.67722
GDF11	0.951811	3.03023	12.8929	2.11259e-07	3.66429e-06	7.46525
RNF180	1.61784	1.601	12.8891	2.11837e-07	3.66429e-06	7.65239
ZNF316	0.745803	5.12712	12.8813	2.13012e-07	3.67332e-06	7.15083
FBXO32	0.571569	6.86172	12.87	2.14733e-07	3.68919e-06	7.01983
SNRPN	6.30274	-2.52455	12.8465	2.18357e-07	3.74626e-06	7.64259
CHGB	2.06821	0.527942	12.8272	2.21399e-07	3.7616e-06	7.69925
SHANK1	2.36831	0.777683	12.8228	2.22094e-07	3.76877e-06	7.67848
C3orf14	0.792527	4.77701	12.8033	2.2521e-07	3.80763e-06	7.12667
ACTN2	2.34455	0.144943	12.7915	2.27116e-07	3.83515e-06	7.69394
PRDM11	1.12676	2.07864	12.7761	2.29638e-07	3.86828e-06	7.51233
A1BG	2.5444	2.20036	12.7732	2.30119e-07	3.87166e-06	7.49446
GTF2H1	0.570055	6.31604	12.7676	2.31038e-07	3.8824e-06	6.96848
SLCO5A1	1.64193	1.79164	12.7464	2.34585e-07	3.92291e-06	7.52429
TMEM246	2.02176	0.195845	12.7385	2.35917e-07	3.9316e-06	7.65301
SLC25A16	0.694406	4.84469	12.738	2.36005e-07	3.9316e-06	7.0682
ZNF790	3.9777	-0.362188	12.7063	2.4145e-07	3.9942e-06	7.64788
RFTN1	0.62786	5.11951	12.6881	2.44643e-07	4.04216e-06	7.00138
ST6GALNAC3	0.796353	6.97745	12.6757	2.46843e-07	4.06878e-06	6.86257
SLC38A7	0.677762	6.36701	12.6362	2.53988e-07	4.17659e-06	6.86261
VASH1	0.997585	3.38395	12.6083	2.59184e-07	4.24687e-06	7.18735
KIAA0101	0.713884	6.29913	12.5462	2.71156e-07	4.39331e-06	6.79535
ZNF577	3.00062	0.441872	12.5254	2.75291e-07	4.44229e-06	7.48153
SLFN11	7.186	-1.51251	12.5234	2.75698e-07	4.44365e-06	7.50336
PLA1A	0.779522	5.78212	12.5027	2.79901e-07	4.49566e-06	6.79749
KCNQ1	2.43681	-0.0710667	12.4862	2.83296e-07	4.54492e-06	7.47903
CD59	0.531644	8.56525	12.4811	2.84347e-07	4.55648e-06	6.65779
H2AFX	0.858932	7.41172	12.4678	2.87127e-07	4.5957e-06	6.67865
THEMIS2	0.663984	6.37848	12.4648	2.87768e-07	4.5968e-06	6.72617
TTC16	1.90412	2.12773	12.4628	2.88189e-07	4.5968e-06	7.26565
ZNF266	0.828056	3.98039	12.4628	2.88195e-07	4.5968e-06	6.97151
HADHA	0.521526	8.31703	12.4311	2.94974e-07	4.67006e-06	6.62329
RP11-313J2.1	1.92402	2.66815	12.4249	2.96318e-07	4.67776e-06	7.15941
CDC25A	0.562455	5.88387	12.4234	2.96656e-07	4.67776e-06	6.72618
ASRGL1	0.816972	6.02595	12.4167	2.98101e-07	4.69518e-06	6.71019
ZNF75A	0.968421	2.94857	12.4021	3.01341e-07	4.71396e-06	7.09815
TMCC3	1.59591	2.70255	12.382	3.05832e-07	4.7734e-06	7.12049
RAD51	0.644435	5.19535	12.3699	3.08573e-07	4.80922e-06	6.74228
GARS	0.513388	7.6868	12.3688	3.08823e-07	4.80922e-06	6.58959
HIST1H2BO	2.42435	-1.42988	12.3612	3.10563e-07	4.83086e-06	7.39181
BACE1	1.3752	4.43979	12.3551	3.11948e-07	4.84695e-06	6.81692
ATP13A2	0.828312	9.09851	12.3536	3.12311e-07	4.84714e-06	6.54457
C15orf52	0.619085	5.521	12.3468	3.13873e-07	4.86591e-06	6.69483
NCAM1	1.18301	3.07351	12.3261	3.18709e-07	4.92982e-06	7.01788
ADCY6	0.503592	7.11652	12.3178	3.20687e-07	4.95487e-06	6.57111
PRKCZ	1.08548	3.09131	12.3115	3.22177e-07	4.97233e-06	7.00333
ASB4	3.12314	-0.425781	12.2748	3.31079e-07	5.08083e-06	7.33321
SRPRA	0.504815	7.83203	12.2717	3.31843e-07	5.08083e-06	6.50699
CTDSP2	0.524265	6.77	12.2705	3.3215e-07	5.08083e-06	6.54979
TGFB1I1	1.59203	3.23019	12.2102	3.4741e-07	5.27338e-06	6.89901
NPLOC4	0.512719	8.11139	12.203	3.49282e-07	5.29017e-06	6.44404
NBPF9	0.808433	5.48677	12.1762	3.56328e-07	5.3792e-06	6.56
TSPYL1	0.850089	5.49654	12.1592	3.60912e-07	5.43892e-06	6.54527
CLSTN2	1.39406	1.19295	12.1254	3.70175e-07	5.55785e-06	7.11021
ZNF548	1.16508	2.77205	12.1225	3.70979e-07	5.56388e-06	6.90346
PRKAR1B	1.05792	2.32269	12.1207	3.7149e-07	5.5655e-06	6.96931
UNC13A	2.76487	-0.0287535	12.1045	3.76031e-07	5.62134e-06	7.19009
SMIM3	1.27246	3.18143	12.103	3.76461e-07	5.62168e-06	6.8211
CACNA1D	1.31831	2.4986	12.095	3.78721e-07	5.64323e-06	6.92308
PCDHGA9	5.26013	-1.57341	12.0914	3.79768e-07	5.65274e-06	7.19274
ZIK1	6.30474	-1.24429	12.0638	3.87734e-07	5.74653e-06	7.18052
FAM174B	0.795505	4.71307	12.0581	3.89423e-07	5.76209e-06	6.54059
ZNF724P	3.12487	0.122093	12.0536	3.90748e-07	5.77262e-06	7.1429
PVR	0.515504	6.06091	12.0418	3.94235e-07	5.80552e-06	6.40374
STAT2	0.504878	6.71392	12.034	3.9656e-07	5.82732e-06	6.35975
WDR76	0.676912	5.14879	12.0109	4.03568e-07	5.91771e-06	6.45538
POLE	0.804857	6.51164	11.9978	4.07606e-07	5.95932e-06	6.34028
GPR150	1.89069	1.25659	11.9892	4.10274e-07	5.98102e-06	6.99594
F8A3	0.938118	4.72578	11.9885	4.10483e-07	5.98102e-06	6.48199
SCUBE2	0.781187	3.43918	11.9866	4.11085e-07	5.98347e-06	6.68156
PGPEP1	0.655476	5.65886	11.9836	4.11996e-07	5.98677e-06	6.3876
RORB	1.56424	1.70271	11.9831	4.12178e-07	5.98677e-06	6.94067
MYO15B	1.99354	0.91624	11.9734	4.15208e-07	6.02444e-06	7.01809
CCPG1	1.03891	6.16855	11.9628	4.18578e-07	6.06696e-06	6.33131
CHPT1	0.620857	6.28913	11.945	4.24291e-07	6.14332e-06	6.30899
GPRASP2	1.66125	2.50478	11.9391	4.26195e-07	6.16443e-06	6.79621
ZSCAN23	4.58283	-3.57067	11.906	4.37085e-07	6.30873e-06	6.88662
HSD17B12	0.492276	7.18741	11.9014	4.38631e-07	6.31784e-06	6.22694
H2AFV	0.489882	7.45488	11.886	4.43796e-07	6.37893e-06	6.20286
CAMK1G	1.38485	1.15052	11.8845	4.44333e-07	6.38001e-06	6.92363
TMEM204	4.82839	-3.4472	11.8742	4.47845e-07	6.4171e-06	6.88245
ZNF260	1.34408	3.39142	11.8636	4.51482e-07	6.44915e-06	6.58914
DHCR24	0.477062	9.81547	11.8388	4.60142e-07	6.54055e-06	6.10906
SAMD9	1.54564	2.41443	11.8192	4.67114e-07	6.62448e-06	6.71197
ZNF585B	2.73975	0.448476	11.8173	4.67798e-07	6.62737e-06	6.93574
E2F8	0.995041	3.48626	11.8084	4.71034e-07	6.66638e-06	6.5266
HCN2	1.96601	2.50815	11.7732	4.8397e-07	6.80069e-06	6.66004
ORC6	0.510068	6.65027	11.7681	4.85849e-07	6.81323e-06	6.142
TOLLIP	0.698856	7.46128	11.735	4.98456e-07	6.9688e-06	6.07614
PTTG1IP	0.454503	9.6262	11.728	5.01151e-07	6.99232e-06	6.01925
RAP1A	0.554923	5.81817	11.7233	5.02993e-07	6.99323e-06	6.15754
FAM118B	0.605197	4.89954	11.7226	5.03241e-07	6.99323e-06	6.24105
GALNTL6	2.40489	-0.804674	11.7204	5.04096e-07	6.99807e-06	6.92054
TMEM163	0.788047	5.7346	11.7139	5.06659e-07	7.02659e-06	6.15645
TMSB4X	1.0514	7.75181	11.6994	5.12363e-07	7.09145e-06	6.03631
EID1	0.583887	8.17713	11.698	5.12951e-07	7.09248e-06	6.02389
SP140L	2.04084	1.39665	11.6876	5.17074e-07	7.14234e-06	6.73759
ZNF549	1.18353	3.16016	11.6592	5.28622e-07	7.26403e-06	6.46009
SUMO3	0.458926	7.44499	11.6582	5.29039e-07	7.26403e-06	6.01194
TARSL2	0.747383	4.46174	11.573	5.654e-07	7.68688e-06	6.16961
BCAR3	0.490301	6.15239	11.5716	5.66034e-07	7.68793e-06	6.00415
ZNF382	3.07077	0.0109517	11.5697	5.66853e-07	7.69149e-06	6.76932
SHROOM2	1.29227	3.66992	11.5676	5.67788e-07	7.69661e-06	6.29233
SCD5	1.51793	0.742935	11.5639	5.6944e-07	7.71144e-06	6.7061
AP4B1	0.685548	4.12128	11.562	5.70273e-07	7.71381e-06	6.21119
EVC	0.84533	6.24268	11.5598	5.7129e-07	7.71381e-06	5.98819
RP11-382A20.3	0.871629	3.84773	11.5504	5.75502e-07	7.75552e-06	6.24662
ZNF419	1.01287	2.83475	11.5425	5.79071e-07	7.79198e-06	6.41678
MS4A7	2.37833	0.846766	11.5265	5.86386e-07	7.85726e-06	6.66526
CDCA7L	0.672027	5.77234	11.5263	5.86464e-07	7.85726e-06	5.99435
PHTF1	0.951003	4.33996	11.5157	5.91374e-07	7.8848e-06	6.13846
MIB2	1.02476	5.08805	11.4927	6.02163e-07	8.01902e-06	6.02683
IFT46	1.16398	3.24092	11.4777	6.09326e-07	8.08513e-06	6.29316
RAB39B	2.88685	-0.784712	11.446	6.24762e-07	8.28199e-06	6.70553
PLXNA3	1.03023	3.74756	11.4437	6.2593e-07	8.28578e-06	6.17333
SLC35C1	0.625078	5.14298	11.4249	6.35299e-07	8.36999e-06	5.96329
MCOLN3	0.812764	4.10271	11.4239	6.35809e-07	8.36999e-06	6.09647
SLC30A7	0.627963	5.67966	11.4228	6.36359e-07	8.36999e-06	5.91332
PLEKHO2	0.549063	7.28528	11.408	6.4384e-07	8.44573e-06	5.80468
ADGRE2	1.6984	1.18853	11.3808	6.57931e-07	8.60606e-06	6.50796
RNF145	0.610636	7.43006	11.3783	6.59241e-07	8.61504e-06	5.77294
METTL7A	0.997262	1.90553	11.3704	6.63356e-07	8.64769e-06	6.41116
ANTXR1	0.584755	6.09222	11.3553	6.71403e-07	8.71754e-06	5.82251
MLEC	0.787828	8.8376	11.3431	6.77929e-07	8.77622e-06	5.7055
TTLL7	1.25363	4.47886	11.3333	6.83278e-07	8.82067e-06	5.96193
ZNF44	1.96456	1.18994	11.3154	6.93074e-07	8.93878e-06	6.45313
PER3	1.26437	7.3205	11.312	6.94988e-07	8.94676e-06	5.71993
SPATA2	0.697278	4.61725	11.2842	7.1058e-07	9.10712e-06	5.90066
PDIA3	0.424646	9.50933	11.2805	7.12684e-07	9.12354e-06	5.63763
PNPLA4	1.26424	2.76323	11.2788	7.13653e-07	9.12749e-06	6.2044
CSPG4P11	2.77048	-1.8161	11.2635	7.22457e-07	9.21509e-06	6.56357
PARP8	1.90512	-0.0171739	11.2634	7.22503e-07	9.21509e-06	6.52263
TMEM151B	4.36	-3.68392	11.2499	7.30372e-07	9.30686e-06	6.41728
PPIP5K1	0.709055	5.29697	11.2486	7.31141e-07	9.30806e-06	5.79618
C2CD2	1.24536	3.72052	11.196	7.62756e-07	9.6663e-06	5.96464
MLLT11	1.00428	2.58808	11.1734	7.76782e-07	9.82573e-06	6.14181
PKIB	1.19848	2.12932	11.1595	7.85515e-07	9.91581e-06	6.20015
IRAK1	0.628062	6.5098	11.1587	7.86058e-07	9.91581e-06	5.6258
MNS1	0.982074	3.8401	11.135	8.01257e-07	1.00525e-05	5.89026
PLEKHO1	0.910505	5.19141	11.1297	8.04687e-07	1.00863e-05	5.7019
ZNF229	7.55208	-1.22852	11.1189	8.11737e-07	1.01563e-05	6.45241
ZNF345	2.50486	-0.561238	11.1175	8.12707e-07	1.01592e-05	6.43287
VILL	1.617	1.13887	11.1	8.24283e-07	1.02391e-05	6.27681
ARMCX1	3.41002	-2.47572	11.0944	8.28066e-07	1.02676e-05	6.40813
VAPA	0.44704	7.60656	11.0621	8.50121e-07	1.05222e-05	5.48952
MRC2	2.07726	1.5158	11.0553	8.54844e-07	1.05641e-05	6.19308
RBM8A	0.502861	7.39799	11.0426	8.63681e-07	1.0659e-05	5.48012
CELF6	1.89931	0.0259759	11.0415	8.6452e-07	1.0659e-05	6.3353
ZNF132	1.53572	0.595416	11.0393	8.66015e-07	1.0659e-05	6.28417
DLG4	1.39133	2.18315	11.0386	8.66566e-07	1.0659e-05	6.0876
ZNF37BP	0.973155	2.69721	11.0385	8.66576e-07	1.0659e-05	6.00707
ALX4	1.83988	0.926117	11.0312	8.71798e-07	1.07137e-05	6.24224
ITGA5	0.547605	7.20716	11.0217	8.78556e-07	1.07647e-05	5.46979
CAT	0.445124	6.89021	11.0165	8.82313e-07	1.07779e-05	5.48049
RBMXL1	0.923995	4.8313	11.0152	8.83257e-07	1.07779e-05	5.6381
RILPL2	0.854676	3.35723	11.008	8.88433e-07	1.08124e-05	5.86619
ZNF134	0.917098	3.84677	11.008	8.88441e-07	1.08124e-05	5.77745
HIST2H4A	1.44011	2.75263	10.9905	9.01253e-07	1.09112e-05	5.95591
FADS1	0.491557	8.44002	10.9899	9.01707e-07	1.09112e-05	5.40334
VPS26B	0.588142	5.64902	10.9894	9.02092e-07	1.09112e-05	5.53663
UBAP1L	0.918501	7.38438	10.9852	9.0517e-07	1.09389e-05	5.42959
FGL2	5.19791	-2.28197	10.9794	9.09517e-07	1.09688e-05	6.32743
HERPUD1	0.423209	9.20686	10.9699	9.16605e-07	1.10384e-05	5.36929
TMEM59	0.455227	7.65898	10.9373	9.41516e-07	1.13088e-05	5.37654
CCDC34	0.705226	4.8552	10.9358	9.42627e-07	1.13123e-05	5.56475
AC240274.1	0.779534	4.01372	10.9326	9.45109e-07	1.13323e-05	5.682
C10orf35	1.27506	1.71745	10.9238	9.51998e-07	1.13951e-05	6.05302
PRDX2	1.177	5.96556	10.9223	9.53159e-07	1.13991e-05	5.45082
SLC16A1	0.86233	6.81417	10.9199	9.5504e-07	1.14117e-05	5.39811
TIMELESS	0.472524	6.17424	10.912	9.61313e-07	1.14668e-05	5.42655
SH3BGRL	0.555887	5.3876	10.9042	9.67459e-07	1.15203e-05	5.48357
MTMR1	0.670615	4.22443	10.8961	9.74015e-07	1.15799e-05	5.61552
PXK	0.586812	4.30807	10.8905	9.78475e-07	1.16214e-05	5.59765
CEP112	2.06138	-0.632738	10.8796	9.87336e-07	1.17065e-05	6.23889
MECP2	0.67559	6.82071	10.8746	9.91438e-07	1.1735e-05	5.35707
FBXO9	0.485652	5.66439	10.8727	9.9295e-07	1.17428e-05	5.43098
ZNF544	0.706745	4.28374	10.8607	1.00286e-06	1.18105e-05	5.57471
SORT1	0.589602	8.73598	10.854	1.00847e-06	1.18553e-05	5.27498
ZWINT	0.523888	7.08343	10.8527	1.00956e-06	1.18581e-05	5.32427
CCDC180	1.49324	1.44275	10.8509	1.01101e-06	1.1865e-05	6.02486
NFRKB	0.564076	5.47451	10.8407	1.01964e-06	1.19561e-05	5.41873
IL17D	0.845853	3.41912	10.8324	1.02666e-06	1.20282e-05	5.69889
TARS2	0.584774	5.80066	10.8298	1.02887e-06	1.20438e-05	5.38089
SCCPDH	0.471715	6.4314	10.8111	1.045e-06	1.22223e-05	5.32019
DDIT3	0.825388	5.20876	10.8077	1.04791e-06	1.2246e-05	5.41337
FHL2	0.654088	5.03889	10.7955	1.05856e-06	1.236e-05	5.41911
NKIRAS1	0.696793	4.18722	10.7872	1.06592e-06	1.2425e-05	5.5236
RORA	1.7259	2.95108	10.7802	1.07216e-06	1.24871e-05	5.73613
TM2D3	0.611339	5.03195	10.7601	1.0903e-06	1.26345e-05	5.38773
LRRC61	1.59129	1.87536	10.7499	1.09956e-06	1.27205e-05	5.87841
CTNNA2	1.04938	2.99514	10.7408	1.10793e-06	1.27783e-05	5.69324
ARHGEF5	1.52077	1.29325	10.7405	1.10826e-06	1.27783e-05	5.94647
ESR2	1.35793	3.32825	10.7293	1.11865e-06	1.28873e-05	5.62312
PODN	1.95606	-0.0633943	10.7241	1.12351e-06	1.29325e-05	6.07232
TNFAIP3	0.753358	5.7988	10.7049	1.14179e-06	1.31102e-05	5.26781
S100A16	0.902437	4.54643	10.6911	1.15505e-06	1.32294e-05	5.3833
ZNF440	0.749048	3.13406	10.6885	1.15758e-06	1.32371e-05	5.62155
CHEK1	0.565285	5.71926	10.6795	1.1663e-06	1.33141e-05	5.25134
ZNRF2	0.982253	3.88669	10.6768	1.16901e-06	1.33231e-05	5.47372
ZNF613	2.71543	0.469645	10.6712	1.17448e-06	1.33375e-05	5.97942
VPS45	0.496811	5.23396	10.6708	1.17483e-06	1.33375e-05	5.2868
PI4K2A	0.536748	5.92324	10.6591	1.18646e-06	1.34333e-05	5.21595
2003-03-01	1.56712	2.09745	10.6552	1.19033e-06	1.3466e-05	5.76186
LINGO2	4.98677	-2.0189	10.6539	1.19167e-06	1.34701e-05	6.07333
CHFR	0.473451	5.80427	10.6422	1.20348e-06	1.35814e-05	5.21014
MAT1A	2.3256	-0.47818	10.6286	1.21728e-06	1.3726e-05	6.01794
ZNF211	0.923924	2.42621	10.6161	1.23026e-06	1.38396e-05	5.67561
IGSF11	0.497079	5.32763	10.616	1.23037e-06	1.38396e-05	5.22786
HMGN3	0.511452	6.14729	10.6072	1.23947e-06	1.39194e-05	5.1519
SORBS3	0.994223	5.2937	10.6005	1.2465e-06	1.3987e-05	5.21688
IRF7	2.13786	0.913424	10.5792	1.2692e-06	1.4207e-05	5.84965
C1orf198	0.434836	7.22831	10.5698	1.27934e-06	1.42973e-05	5.05965
RAPGEF5	1.6125	2.15006	10.5665	1.28294e-06	1.43144e-05	5.674
PCDHGA1	3.47445	-1.74391	10.539	1.31313e-06	1.45853e-05	5.98005
ABHD6	0.513646	6.05794	10.5377	1.31462e-06	1.45853e-05	5.09409
MTCH1	0.644472	8.56492	10.5373	1.31507e-06	1.45853e-05	4.98951
SCN1A	2.67407	-2.78568	10.5368	1.31567e-06	1.45853e-05	5.95352
ZNF605	1.14771	3.55079	10.5339	1.31887e-06	1.46091e-05	5.4042
PAEP	1.05249	8.09948	10.5293	1.32401e-06	1.46543e-05	4.99294
LUM	0.700845	4.05038	10.5059	1.35064e-06	1.49013e-05	5.28949
EXO5	0.803905	3.90024	10.4914	1.36745e-06	1.50747e-05	5.30172
TIMM10B	0.46509	5.77267	10.483	1.37725e-06	1.51706e-05	5.0661
PABPC5	4.16404	-1.94065	10.4672	1.39596e-06	1.53522e-05	5.91959
NFIB	0.878001	4.13925	10.4606	1.40381e-06	1.54263e-05	5.23297
CACNA2D1	2.11723	2.61994	10.4543	1.41141e-06	1.54975e-05	5.49675
ZNF703	0.473909	8.38856	10.447	1.42026e-06	1.55699e-05	4.90965
ZNF681	2.37615	-0.411695	10.4455	1.42205e-06	1.55771e-05	5.85491
ZNF883	2.09729	-0.478325	10.4401	1.42864e-06	1.56369e-05	5.85443
SLC35E2B	0.518457	6.62529	10.4285	1.44291e-06	1.57228e-05	4.95869
B3GNT9	1.292	2.04006	10.4154	1.45916e-06	1.58603e-05	5.55322
MOAP1	0.546815	6.05076	10.4103	1.46562e-06	1.58876e-05	4.97636
CD99L2	0.479192	6.96314	10.4096	1.46649e-06	1.58876e-05	4.92378
ZKSCAN2	0.883628	4.03153	10.4032	1.47459e-06	1.59502e-05	5.19755
RRM2	0.460972	8.0519	10.3935	1.48688e-06	1.6058e-05	4.86778
RPS6P12	2.47597	-0.421675	10.3881	1.49384e-06	1.6108e-05	5.80513
DNER	0.711342	6.66897	10.3694	1.51799e-06	1.63557e-05	4.90123
HIST2H2AA3	4.59515	3.83277	10.3654	1.52318e-06	1.63861e-05	5.19686
TLR4	1.39432	3.64018	10.353	1.53956e-06	1.65097e-05	5.22038
FXYD3	1.15649	5.23403	10.3482	1.54603e-06	1.65545e-05	4.9885
LDHC	0.964664	2.29033	10.3442	1.55132e-06	1.65922e-05	5.44923
TMEM41B	0.687742	4.94104	10.3324	1.56726e-06	1.673e-05	5.00339
HVCN1	1.90688	0.0879185	10.328	1.57315e-06	1.67799e-05	5.71207
MCAM	0.42679	10.3228	10.3178	1.58709e-06	1.69024e-05	4.75202
SARS	0.577319	7.56559	10.3005	1.61104e-06	1.71311e-05	4.79489
RHOQ	0.522741	8.24613	10.2979	1.61468e-06	1.71434e-05	4.77324
HIST1H4I	1.53613	3.36361	10.293	1.6215e-06	1.71894e-05	5.21621
MEIS2	0.89631	3.34966	10.2898	1.62605e-06	1.72244e-05	5.21579
CADPS	2.12849	1.44086	10.2855	1.63214e-06	1.72624e-05	5.51809
BAHD1	0.502385	6.33899	10.2721	1.6512e-06	1.74373e-05	4.82776
ZDHHC4	0.80371	5.30811	10.2602	1.66829e-06	1.75775e-05	4.89885
DHFR	0.545809	7.99955	10.2508	1.68199e-06	1.77084e-05	4.73482
SARAF	0.451144	7.88638	10.2467	1.68795e-06	1.77575e-05	4.73402
PCDH15	4.42726	-3.24969	10.2406	1.69698e-06	1.78389e-05	5.68772
RNF216P1	0.683086	4.35992	10.2388	1.69966e-06	1.784e-05	4.99133
ZNF432	1.06368	2.14547	10.2122	1.73945e-06	1.81472e-05	5.3496
DPYD	1.79784	0.702277	10.1878	1.77683e-06	1.84259e-05	5.52126
DLL3	1.07705	4.29608	10.1805	1.78828e-06	1.85308e-05	4.94594
SEC22B	0.542307	6.49556	10.1781	1.79197e-06	1.8555e-05	4.7299
SYT11	0.627625	5.89088	10.1745	1.79775e-06	1.8601e-05	4.76662
MADD	0.50728	6.36431	10.1734	1.79946e-06	1.86048e-05	4.73272
PIK3R3	0.922086	5.4194	10.1662	1.81078e-06	1.86659e-05	4.79953
FAM111B	0.657582	5.36147	10.1577	1.82422e-06	1.87764e-05	4.79677
ZNF438	0.862978	2.64909	10.1421	1.84945e-06	1.89796e-05	5.20183
VHL	0.526889	5.43655	10.0995	1.91996e-06	1.96209e-05	4.73436
GLMP	0.774849	7.59229	10.0992	1.92047e-06	1.96209e-05	4.60264
MTHFR	0.469028	5.53341	10.0981	1.92226e-06	1.96247e-05	4.72433
PAWR	1.32521	1.56277	10.087	1.94114e-06	1.97882e-05	5.31763
MT1F	1.36	2.26214	10.0812	1.95119e-06	1.98747e-05	5.20837
GATS	1.08337	2.54155	10.0576	1.99211e-06	2.02033e-05	5.14021
E2F2	0.583735	4.96899	10.0316	2.0386e-06	2.06446e-05	4.71482
POLR3C	0.609559	5.28464	10.0253	2.04987e-06	2.07434e-05	4.67727
ZNF595	1.1946	1.26699	10.0136	2.07125e-06	2.08986e-05	5.28863
TEX9	0.865618	1.95837	10.0103	2.07739e-06	2.09452e-05	5.18855
ORC1	0.603462	5.7723	10.0051	2.08691e-06	2.10106e-05	4.61428
RMDN3	0.505256	5.91269	10.0023	2.09221e-06	2.10485e-05	4.59993
SYCE1	1.92557	-0.886068	9.99909	2.09812e-06	2.10926e-05	5.48623
PRKACB	0.852815	5.25936	9.99407	2.10748e-06	2.1156e-05	4.64954
ZNF84	1.19815	3.80079	9.98725	2.12027e-06	2.12689e-05	4.84479
SYT12	2.22021	0.245453	9.97933	2.13525e-06	2.13572e-05	5.37937
SATB1	1.24927	2.1313	9.96946	2.15407e-06	2.15143e-05	5.12331
RADIL	2.06855	-0.960941	9.9668	2.15919e-06	2.15498e-05	5.46102
RP11-28B23.1	3.35667	-2.50995	9.96569	2.16132e-06	2.15555e-05	5.48699
RNF19B	0.501729	5.51376	9.94143	2.20854e-06	2.19178e-05	4.57521
DOCK5	0.824912	4.39354	9.93495	2.22135e-06	2.2027e-05	4.69612
RUSC1	0.953281	5.08468	9.93377	2.22369e-06	2.20343e-05	4.60838
SLC17A7	1.13281	1.23789	9.92792	2.23534e-06	2.2118e-05	5.21174
NRROS	1.0545	2.46157	9.88317	2.32663e-06	2.28575e-05	4.98713
PRKAR1A	0.539022	7.69585	9.88197	2.32913e-06	2.28658e-05	4.38913
RUBCN	0.542885	5.74222	9.87761	2.33826e-06	2.29229e-05	4.49318
STT3A	0.400052	7.90866	9.87672	2.34012e-06	2.29248e-05	4.37772
PARP3	0.830873	3.84673	9.87409	2.34564e-06	2.29484e-05	4.72725
SLC6A8	0.745736	8.36804	9.87361	2.34666e-06	2.29484e-05	4.36328
KIF5C	2.25071	1.19971	9.86451	2.3659e-06	2.30629e-05	5.15669
PYCARD	4.6534	-2.37409	9.85494	2.38632e-06	2.31883e-05	5.39244
TEC	0.966432	2.35619	9.85455	2.38716e-06	2.31883e-05	4.97713
CHMP2B	0.628003	5.96491	9.84207	2.41408e-06	2.34005e-05	4.44025
MKNK2	0.459822	7.63292	9.84124	2.41589e-06	2.34016e-05	4.35137
L3MBTL1	1.27576	1.5837	9.83844	2.42198e-06	2.34442e-05	5.07948
LAPTM4A	0.434587	7.77636	9.83654	2.42612e-06	2.34515e-05	4.3422
ELP4	0.654408	3.7293	9.83309	2.43367e-06	2.34915e-05	4.70888
CD55	0.442201	5.71472	9.82417	2.45329e-06	2.36432e-05	4.44332
DLG3	0.720001	2.88357	9.82361	2.45452e-06	2.36432e-05	4.85713
CISD2	0.520887	6.118	9.81511	2.47339e-06	2.37917e-05	4.4024
UBE4A	0.691393	6.25282	9.80355	2.49932e-06	2.39911e-05	4.38202
POC1A	0.555453	4.85198	9.78563	2.54008e-06	2.42979e-05	4.489
MERTK	0.641021	6.10249	9.76552	2.58671e-06	2.46344e-05	4.35476
WNT6	2.63707	-0.594112	9.76536	2.58709e-06	2.46344e-05	5.25384
SNX8	0.463733	7.03481	9.75447	2.61273e-06	2.47868e-05	4.29169
SMPD1	0.587362	6.48162	9.74658	2.63148e-06	2.49476e-05	4.31266
GLTP	0.516765	5.93093	9.73292	2.66429e-06	2.51838e-05	4.33566
PTPN1	0.464267	7.47384	9.72893	2.67397e-06	2.52439e-05	4.2467
PCSK6	0.741125	2.49938	9.7252	2.68303e-06	2.52873e-05	4.82786
CTC1	0.731608	3.71153	9.7249	2.68379e-06	2.52873e-05	4.60638
RTCA	0.4137	6.54831	9.70767	2.72614e-06	2.56513e-05	4.27057
ODF2L	0.779916	5.2832	9.70593	2.73046e-06	2.56745e-05	4.36594
CASP10	3.19358	0.317512	9.69343	2.76171e-06	2.5933e-05	5.10311
F8A1	0.901654	4.90432	9.66479	2.8348e-06	2.65291e-05	4.36395
MTURN	0.817104	5.77095	9.65985	2.8476e-06	2.66309e-05	4.27653
PICK1	0.957895	4.24261	9.65757	2.85355e-06	2.66685e-05	4.44788
GABRA5	5.45331	-2.37108	9.6183	2.95798e-06	2.75699e-05	5.18245
NUDT17	1.11923	1.50245	9.61605	2.96408e-06	2.76081e-05	4.87612
BRSK1	0.799499	5.53793	9.6139	2.96993e-06	2.76439e-05	4.25114
ZNF329	0.88423	2.69938	9.60378	2.99762e-06	2.78372e-05	4.6744
DNAJB11	0.399986	7.56327	9.60068	3.00617e-06	2.78873e-05	4.11594
ZNF85	0.945373	2.03592	9.5977	3.01441e-06	2.79075e-05	4.77899
TMEM56	0.879687	4.78308	9.59311	3.02713e-06	2.79691e-05	4.30691
DPF1	0.749354	2.94179	9.5774	3.07117e-06	2.8338e-05	4.6055
VPS18	0.644989	6.95022	9.57612	3.07481e-06	2.83509e-05	4.11873
IRX6	1.00347	4.4122	9.57474	3.07871e-06	2.83509e-05	4.33941
RILP	1.47222	2.25854	9.57166	3.08745e-06	2.84124e-05	4.71761
RPL38P3	4.93119	-3.21094	9.5696	3.0933e-06	2.84472e-05	5.12319
RNF135	0.808803	3.41721	9.56549	3.10503e-06	2.85361e-05	4.50472
ALPK1	1.09234	2.79491	9.56058	3.11911e-06	2.86274e-05	4.61496
CHD1L	0.460806	5.80284	9.5587	3.12452e-06	2.8658e-05	4.17298
IPO5P1	2.45748	-0.22725	9.54593	3.16151e-06	2.89205e-05	5.01719
KLHL21	0.375154	7.67129	9.53944	3.18052e-06	2.9063e-05	4.0508
FOXM1	0.416365	8.15175	9.5189	3.24143e-06	2.95732e-05	4.01678
STARD10	0.815093	4.14599	9.50732	3.27634e-06	2.97934e-05	4.31365
ZNF10	1.24575	1.83569	9.50579	3.28098e-06	2.97963e-05	4.71925
ZNF180	0.943231	2.66536	9.47136	3.38742e-06	3.06029e-05	4.54893
ZNF675	0.762339	2.65921	9.46359	3.41194e-06	3.08034e-05	4.54225
MDH1	0.408141	8.24654	9.4515	3.45051e-06	3.10906e-05	3.94646
EPB41L4A	0.822636	2.28705	9.43645	3.49919e-06	3.14063e-05	4.57875
ZNF284	1.35874	1.05462	9.42027	3.55235e-06	3.17897e-05	4.74595
PCLO	1.91244	2.76101	9.41994	3.55342e-06	3.17897e-05	4.48069
NBL1	0.764656	9.63366	9.4047	3.60433e-06	3.21411e-05	3.86975
ZNF75D	1.20573	2.40969	9.40057	3.61826e-06	3.22238e-05	4.52221
ZNF93	1.06159	2.4832	9.39933	3.62245e-06	3.22387e-05	4.50841
TSPAN6	0.456714	5.01766	9.39852	3.62519e-06	3.22387e-05	4.08451
PPP6R1	0.485226	7.86574	9.39611	3.63339e-06	3.22673e-05	3.90002
MAP7D3	0.627861	4.87607	9.39112	3.65035e-06	3.23652e-05	4.09259
ZDHHC2	2.70508	0.0488171	9.38679	3.66516e-06	3.24739e-05	4.83646
EPHX1	0.78395	7.88294	9.36829	3.72919e-06	3.29356e-05	3.87122
EXTL2	0.44084	5.84411	9.3642	3.74351e-06	3.3041e-05	3.97306
TBC1D16	0.380826	9.44543	9.3629	3.74807e-06	3.3054e-05	3.83069
SYT3	2.17979	0.364089	9.35631	3.77131e-06	3.32015e-05	4.77153
UBE2D4	0.725357	3.42611	9.34593	3.8082e-06	3.34836e-05	4.28253
FICD	0.815243	3.07127	9.33849	3.83492e-06	3.36711e-05	4.34254
CCNDBP1	0.514539	5.79942	9.3366	3.84171e-06	3.36711e-05	3.94868
AP3B2	0.731617	2.74234	9.33301	3.8547e-06	3.37635e-05	4.39644
OCIAD1	0.424186	6.54329	9.32289	3.89155e-06	3.40646e-05	3.88373
OSTM1	0.755431	8.11084	9.30366	3.96264e-06	3.45773e-05	3.79916
ZNF530	1.00077	2.62193	9.29591	3.99171e-06	3.47544e-05	4.38005
ZNF568	1.97687	0.300848	9.29491	3.99546e-06	3.47544e-05	4.71839
ADAM23	0.897978	3.16348	9.2949	3.99551e-06	3.47544e-05	4.28103
ARHGAP39	0.527996	4.4999	9.29261	4.00415e-06	3.48076e-05	4.04135
SHC3	2.4213	-1.20848	9.29129	4.00913e-06	3.4829e-05	4.84536
NUDT16	0.422264	5.62898	9.2856	4.03071e-06	3.49945e-05	3.91123
CPEB2	1.45895	5.18372	9.28176	4.04533e-06	3.50553e-05	3.94854
MORC1	3.02159	-0.982594	9.28107	4.04799e-06	3.50564e-05	4.82172
HCN1	1.63101	-0.338208	9.27566	4.06871e-06	3.51917e-05	4.76584
VEPH1	0.565115	5.89655	9.27448	4.07325e-06	3.52089e-05	3.87696
ZNF594	3.15628	-0.431176	9.26997	4.09066e-06	3.53152e-05	4.7686
EDC4	0.414741	7.35516	9.26806	4.09804e-06	3.53568e-05	3.787
GLO1	0.356393	8.62722	9.25713	4.14061e-06	3.57018e-05	3.73932
PPARD	0.466543	6.50969	9.25647	4.14321e-06	3.57019e-05	3.81744
TNFRSF10C	1.24723	0.735333	9.2503	4.16746e-06	3.58885e-05	4.62011
HKR1	0.810503	4.10052	9.24915	4.17199e-06	3.59051e-05	4.05947
C17orf51	0.667797	5.01166	9.24723	4.17957e-06	3.59479e-05	3.93066
MYO5A	1.46894	7.44442	9.24039	4.20675e-06	3.61101e-05	3.7548
NUCB2	0.457758	4.6923	9.23619	4.22352e-06	3.62132e-05	3.95685
PDPK2P	1.15086	2.04444	9.23317	4.23566e-06	3.62722e-05	4.41383
PGBD5	0.535916	3.7269	9.22154	4.28261e-06	3.65836e-05	4.09801
PDE4DIP	0.362853	7.22451	9.21952	4.29082e-06	3.66311e-05	3.74282
POU3F3	0.936836	1.15607	9.21526	4.30824e-06	3.67571e-05	4.52745
TMSB15A	2.48489	-0.748161	9.20724	4.34118e-06	3.69924e-05	4.73333
PLCL1	2.02124	2.42878	9.20205	4.36262e-06	3.71293e-05	4.31817
DZIP1	1.16742	1.54154	9.19394	4.39643e-06	3.7348e-05	4.45088
NETO2	0.584721	5.07033	9.19231	4.40326e-06	3.73831e-05	3.86795
ZBTB8B	2.33299	0.451467	9.17885	4.46002e-06	3.77489e-05	4.5849
PBDC1	0.550353	4.62017	9.17711	4.46744e-06	3.77807e-05	3.90568
TMEM140	0.733866	4.28047	9.17669	4.46924e-06	3.77807e-05	3.95554
B2M	0.504319	8.60956	9.17315	4.48433e-06	3.7885e-05	3.65293
GFPT2	0.982068	2.64995	9.16886	4.50269e-06	3.79937e-05	4.24566
ZFP69	0.972121	2.5064	9.1611	4.53614e-06	3.82525e-05	4.26286
QPRT	0.699237	5.54691	9.15667	4.55535e-06	3.8321e-05	3.78557
ZNF503	0.456793	5.33115	9.15284	4.57206e-06	3.84381e-05	3.80144
DLK1	1.96986	1.28213	9.14285	4.61588e-06	3.87594e-05	4.43644
BNIP2	0.637863	6.84054	9.139	4.63293e-06	3.88789e-05	3.67846
CNRIP1	0.615452	3.61688	9.13548	4.64851e-06	3.8986e-05	4.0302
RTN1	2.57104	-1.7495	9.13095	4.66871e-06	3.91316e-05	4.71702
GOLGA3	0.64608	6.51381	9.11957	4.71982e-06	3.94881e-05	3.67554
MAP7D2	3.11603	-0.423223	9.11751	4.72917e-06	3.95423e-05	4.61772
GABRB3	0.995537	3.21908	9.11306	4.74938e-06	3.96394e-05	4.08399
DYNLT3	0.462487	6.20565	9.10373	4.79202e-06	3.99711e-05	3.67733
ATP6V0A2	0.669047	5.0365	9.09398	4.83706e-06	4.0253e-05	3.76943
GLMN	0.632684	4.11306	9.09389	4.83747e-06	4.0253e-05	3.89701
EPHA3	3.20132	-1.9751	9.09215	4.84559e-06	4.02963e-05	4.68755
KRT8P12	0.739324	2.725	9.08518	4.87811e-06	4.0518e-05	4.14622
TBRG1	0.446395	5.25039	9.08026	4.90122e-06	4.06855e-05	3.73367
SPATS1	2.01505	-0.733562	9.07862	4.90896e-06	4.07252e-05	4.60565
CHMP1B	0.446251	7.80459	9.06764	4.96109e-06	4.10836e-05	3.5629
CCND1	0.395376	9.80833	9.02856	5.15149e-06	4.24568e-05	3.47796
MBOAT7	0.503817	6.41914	9.02756	5.15645e-06	4.24723e-05	3.58461
IFI44	1.23497	0.681017	9.02343	5.17705e-06	4.26165e-05	4.39839
HTR7P1	1.14265	1.26787	9.01159	5.23662e-06	4.30813e-05	4.30439
SLC9A9	1.25515	0.991138	9.00854	5.25212e-06	4.31831e-05	4.34057
BCL11A	1.00767	1.36327	9.00791	5.25532e-06	4.31837e-05	4.28682
CAPZA1	0.410157	7.6508	9.00056	5.29283e-06	4.3466e-05	3.49735
ZFP90	0.520939	4.16326	8.99853	5.30324e-06	4.35256e-05	3.78902
DPH3	0.40208	5.57777	8.99742	5.30893e-06	4.35465e-05	3.61651
ZNF543	0.967085	2.13644	8.98837	5.35567e-06	4.38778e-05	4.14764
IP6K1	0.423008	6.84445	8.98719	5.36182e-06	4.39021e-05	3.51938
PHRF1	0.374156	6.17212	8.9559	5.52707e-06	4.50681e-05	3.52453
TMEM132A	1.15516	1.71401	8.94694	5.57546e-06	4.54359e-05	4.17168
ARL8B	0.49099	7.20721	8.94178	5.60349e-06	4.55836e-05	3.45335
CYP51A1	0.502734	7.82632	8.9351	5.64006e-06	4.58002e-05	3.42274
TEX261	0.416341	6.44971	8.92447	5.69875e-06	4.62224e-05	3.47419
PHF14	0.789792	5.12885	8.91502	5.75148e-06	4.65954e-05	3.57202
KMT5A	0.386424	6.11234	8.90485	5.80887e-06	4.69646e-05	3.47461
ZFP69B	1.33629	0.0323674	8.89602	5.85915e-06	4.7246e-05	4.34823
GIMAP5	1.9298	-1.0589	8.89247	5.87955e-06	4.73552e-05	4.44475
ZNF268	0.788022	3.61819	8.8873	5.9093e-06	4.75394e-05	3.77048
MAP3K12	0.530378	4.70602	8.88121	5.9446e-06	4.77678e-05	3.58425
BICDL1	0.876923	3.68706	8.87342	5.99011e-06	4.80712e-05	3.74263
ZNF550	0.768299	3.05678	8.87296	5.99281e-06	4.80712e-05	3.864
METTL9	0.376997	6.80072	8.86857	6.01861e-06	4.82222e-05	3.39602
IL1RAPL1	2.0187	-0.896386	8.86313	6.05081e-06	4.84521e-05	4.40317
FAM187B2P	1.86761	-1.48094	8.85657	6.0898e-06	4.87361e-05	4.43565
PSD3	1.41741	3.50263	8.85547	6.09637e-06	4.87604e-05	3.75934
RRM1	0.503712	7.05023	8.83588	6.21473e-06	4.95922e-05	3.3484
FAM53C	0.456316	5.56124	8.83391	6.22681e-06	4.96451e-05	3.44479
WDR19	0.577831	3.96236	8.83203	6.23832e-06	4.96943e-05	3.64765
ANAPC5	0.3955	7.34564	8.82013	6.31171e-06	5.01921e-05	3.31768
TMEM173	0.914123	2.17284	8.81898	6.31886e-06	5.022e-05	3.96433
DTX1	2.13165	-0.501763	8.81384	6.35089e-06	5.04165e-05	4.31932
SNX7	0.551469	4.25877	8.81168	6.36441e-06	5.04949e-05	3.57595
ZNF569	0.997063	1.45714	8.80352	6.4158e-06	5.08442e-05	4.06063
TAF13	0.513911	4.99738	8.79751	6.45389e-06	5.10874e-05	3.46061
CHSY3	1.57101	0.315688	8.79442	6.4736e-06	5.11738e-05	4.21008
ZYG11AP1	1.79891	-1.8009	8.79435	6.47401e-06	5.11738e-05	4.38986
CALCB	1.25848	0.223128	8.78416	6.53946e-06	5.14992e-05	4.21082
METTL25	1.17157	0.815114	8.76943	6.63524e-06	5.21939e-05	4.11776
RALA	0.446712	6.72685	8.7438	6.80571e-06	5.33096e-05	3.26628
STAC	4.22286	-2.78364	8.72931	6.90417e-06	5.40019e-05	4.35219
KCNE4	1.82668	1.32981	8.7287	6.90832e-06	5.40037e-05	4.00066
COQ10A	0.916182	3.49106	8.72635	6.92441e-06	5.40683e-05	3.62397
ZNF521	0.814134	3.33789	8.71597	6.99616e-06	5.44746e-05	3.64289
DENND5A	0.496092	6.99645	8.70465	7.07533e-06	5.48675e-05	3.21012
C3orf70	0.994435	1.8924	8.70421	7.07839e-06	5.48675e-05	3.8887
KIAA0408	3.01768	0.106925	8.702	7.09398e-06	5.49351e-05	4.13935
PLXNC1	1.0795	6.73241	8.69824	7.12052e-06	5.50704e-05	3.21684
ZNF583	1.9588	-0.138793	8.69325	7.15596e-06	5.52826e-05	4.15822
ZNF433	2.51336	-1.56297	8.69104	7.17171e-06	5.53407e-05	4.27412
DUSP6	0.524055	6.14472	8.69096	7.17228e-06	5.53407e-05	3.2433
ZNF621	0.695543	4.60791	8.68662	7.20335e-06	5.54626e-05	3.38927
PSMD2	0.324194	9.11433	8.68175	7.23838e-06	5.56392e-05	3.12125
GRAMD1B	0.546033	8.63899	8.67781	7.26684e-06	5.58269e-05	3.12717
EPDR1	0.495252	6.5142	8.66747	7.34215e-06	5.63116e-05	3.19525
ZNF816	0.967603	1.59665	8.66219	7.38091e-06	5.65478e-05	3.89018
EVC2	0.630163	3.54476	8.65195	7.45676e-06	5.70639e-05	3.53344
CROT	0.599011	3.739	8.65124	7.46207e-06	5.70729e-05	3.49508
GATAD2A	0.356672	7.9253	8.62807	7.63702e-06	5.8314e-05	3.09037
STARD3NL	0.41739	5.79515	8.62335	7.67318e-06	5.85578e-05	3.19745
EXOG	0.614343	3.49208	8.61718	7.72076e-06	5.88234e-05	3.50615
IL16	0.461112	5.91402	8.61409	7.74471e-06	5.89277e-05	3.1774
SORL1	1.14145	2.41626	8.61377	7.74724e-06	5.89277e-05	3.70371
TDRD9	4.52524	-3.41353	8.61195	7.76136e-06	5.90026e-05	4.23639
KIAA0226L	0.976095	1.26339	8.6098	7.77813e-06	5.90975e-05	3.88425
SHTN1	0.681668	6.78306	8.60451	7.81946e-06	5.93137e-05	3.11244
PCDH17	1.66389	-0.604769	8.59858	7.86615e-06	5.96023e-05	4.10708
ZNF354A	0.616593	3.15048	8.59662	7.88168e-06	5.96873e-05	3.5507
EXOC6B	0.5373	5.04224	8.58825	7.94819e-06	6.00921e-05	3.22983
ZNF296	1.55889	-0.2128	8.58659	7.96145e-06	6.01595e-05	4.0549
VMA21	0.518519	5.87119	8.58515	7.973e-06	6.02138e-05	3.14937
EGLN3	0.519907	5.31749	8.57573	8.04891e-06	6.06544e-05	3.1887
MTHFD2L	0.708664	3.21043	8.57149	8.08331e-06	6.08473e-05	3.51185
BMP7	2.86246	-2.48234	8.56979	8.09709e-06	6.09178e-05	4.18964
SUPT6H	0.479862	7.16104	8.56616	8.12673e-06	6.10743e-05	3.05138
HIST1H4C	1.70691	-1.66327	8.56501	8.13616e-06	6.11119e-05	4.15162
DNM3	0.941563	1.72614	8.55643	8.20679e-06	6.15755e-05	3.75685
RNF10	0.439327	7.32068	8.55306	8.23476e-06	6.17183e-05	3.02964
HSP90B1	0.518775	10.6922	8.54792	8.2775e-06	6.20049e-05	2.9488
CC2D2A	0.893345	2.60376	8.54731	8.28262e-06	6.20097e-05	3.59847
RP11-295K3.1	1.17645	3.41031	8.54191	8.32783e-06	6.22806e-05	3.44048
ZNF30	1.34297	1.34764	8.54064	8.33854e-06	6.2327e-05	3.79764
SH3GLB1	0.387222	6.99043	8.53791	8.36157e-06	6.24351e-05	3.0289
ACP2	0.504414	5.35426	8.53785	8.36204e-06	6.24351e-05	3.14375
ICOS	1.85512	-0.955243	8.53399	8.39474e-06	6.26115e-05	4.0707
MLXIP	0.481785	6.91405	8.52649	8.45853e-06	6.29513e-05	3.02028
BHLHB9	1.77862	-0.0287417	8.52247	8.49302e-06	6.314e-05	3.96663
PDZD4	0.827724	2.41637	8.51987	8.51536e-06	6.3272e-05	3.60215
RNF216	0.44568	5.79716	8.51202	8.58321e-06	6.36392e-05	3.07558
MED9	0.453775	5.29719	8.50377	8.65523e-06	6.41388e-05	3.11184
BNIP3P17	1.52029	-1.22971	8.49743	8.71093e-06	6.44478e-05	4.054
TMEM8A	0.599377	7.49713	8.49278	8.75213e-06	6.46488e-05	2.95612
CYTH1	0.402369	4.92445	8.48256	8.84327e-06	6.51477e-05	3.12703
ZNF175	1.16686	1.99988	8.48022	8.8643e-06	6.52332e-05	3.63041
ZBED6CL	2.05336	0.47706	8.47665	8.89654e-06	6.54236e-05	3.85434
EPHX4	0.773934	2.40558	8.4763	8.89965e-06	6.54236e-05	3.55664
APH1A	0.549191	7.58516	8.47194	8.9392e-06	6.56793e-05	2.92988
GALNT10	0.578883	4.9131	8.46469	9.00528e-06	6.61297e-05	3.10861
SORD2P	0.86595	1.69372	8.45761	9.0703e-06	6.65717e-05	3.65503
DNAJC9	0.421913	6.18975	8.45173	9.12473e-06	6.69001e-05	2.97866
VWA5A	0.536625	3.98505	8.44815	9.15798e-06	6.71083e-05	3.22803
CHN1	0.612657	3.6918	8.44702	9.16859e-06	6.71504e-05	3.28141
OR2A9P	2.27625	0.191348	8.44578	9.18014e-06	6.71638e-05	3.85841
KANK2	0.495904	7.27038	8.43833	9.25003e-06	6.74964e-05	2.90555
DPAGT1	0.443275	5.87178	8.43709	9.26179e-06	6.75465e-05	2.98662
SV2B	1.91587	-0.598124	8.41996	9.42499e-06	6.85559e-05	3.91883
OTUD7B	0.715391	5.68954	8.4196	9.42844e-06	6.85559e-05	2.98291
SOCS3	0.915488	3.59589	8.41892	9.43494e-06	6.85559e-05	3.26904
SLC9A6	0.900738	4.85902	8.41588	9.46429e-06	6.87331e-05	3.06084
ENPP2	0.671648	4.30771	8.40236	9.59595e-06	6.9616e-05	3.12316
FBXL18	0.726032	4.2579	8.40169	9.60246e-06	6.96267e-05	3.13051
WNT9A	2.43676	-1.29558	8.39875	9.63137e-06	6.9763e-05	3.95582
XPC	0.440884	5.1587	8.38466	9.77127e-06	7.05913e-05	2.99382
SRSF6	0.364014	7.72418	8.38355	9.78237e-06	7.05985e-05	2.82722
ZNF429	0.849403	1.50553	8.38336	9.7843e-06	7.05985e-05	3.6033
F8	1.52885	0.372191	8.38303	9.78761e-06	7.05985e-05	3.76767
TCP11L1	0.644613	3.6272	8.37741	9.84414e-06	7.09323e-05	3.21701
CPZ	2.41668	-0.401989	8.36713	9.94841e-06	7.15343e-05	3.84271
RAB3C	3.55077	-1.78112	8.36064	1.00149e-05	7.19374e-05	3.94736
C4orf32	0.903204	2.66688	8.35116	1.01128e-05	7.25757e-05	3.37233
SLC25A38	0.4918	5.00992	8.35102	1.01143e-05	7.25757e-05	2.97184
RPRD2	0.66778	5.51489	8.3442	1.01854e-05	7.3048e-05	2.91478
TCF19	0.362019	6.44912	8.33964	1.02333e-05	7.32242e-05	2.8382
SHCBP1	0.544102	7.34023	8.33943	1.02354e-05	7.32242e-05	2.79247
ACTR3C	1.91252	-1.61253	8.3378	1.02526e-05	7.32642e-05	3.91344
ZNF350	1.07778	1.29057	8.32147	1.04263e-05	7.439e-05	3.56822
DSG2	4.63256	-2.16818	8.32035	1.04384e-05	7.44379e-05	3.92482
HTATSF1	0.596114	6.05543	8.31438	1.05028e-05	7.48581e-05	2.83547
PDK3	0.449146	4.98467	8.31265	1.05216e-05	7.49532e-05	2.9318
DPP6	0.584711	3.99692	8.31156	1.05334e-05	7.49604e-05	3.07448
HSD17B11	0.377037	6.4216	8.30939	1.0557e-05	7.50897e-05	2.80594
ITGB7	2.58878	0.072716	8.30712	1.05817e-05	7.52265e-05	3.72387
FAM214A	1.01416	3.81501	8.30179	1.06401e-05	7.55247e-05	3.09688
ZBTB44	0.904916	4.68692	8.29788	1.06831e-05	7.57521e-05	2.9511
EOGT	0.682705	3.45383	8.29413	1.07245e-05	7.59293e-05	3.15868
ZSCAN22	0.687043	3.18702	8.2769	1.09172e-05	7.72145e-05	3.19215
ZNF525	1.29711	2.33227	8.27444	1.0945e-05	7.73574e-05	3.34745
PPP1R16B	0.708891	2.35812	8.26846	1.1013e-05	7.77325e-05	3.33622
FRMD4B	0.948358	5.54914	8.26557	1.1046e-05	7.79098e-05	2.82363
CTD-2116N17.1	0.477651	4.11456	8.26467	1.10563e-05	7.79132e-05	3.00157
RAF1	0.380731	6.49151	8.26424	1.10612e-05	7.79132e-05	2.75137
ANXA2	0.440541	9.62455	8.26037	1.11056e-05	7.81065e-05	2.64584
GBA	0.51953	7.64632	8.25124	1.12112e-05	7.87294e-05	2.68162
DUSP15	1.14329	1.33703	8.24624	1.12694e-05	7.90578e-05	3.47831
ATP5F1	0.339706	7.82819	8.24254	1.13128e-05	7.92814e-05	2.66607
FUNDC2	0.575491	4.81804	8.23898	1.13547e-05	7.95345e-05	2.86833
ST5	0.389466	5.99746	8.23634	1.13859e-05	7.97127e-05	2.75237
NBPF11	0.654805	3.69571	8.22011	1.15794e-05	8.09036e-05	3.02827
B3GALNT1	0.925005	1.95131	8.21532	1.16373e-05	8.12259e-05	3.34692
OAS3	0.555112	4.98197	8.21394	1.16541e-05	8.13018e-05	2.82124
FAM96A	0.471601	6.24449	8.21068	1.16937e-05	8.14957e-05	2.70564
PRKAB1	0.440606	4.92385	8.20471	1.17665e-05	8.18795e-05	2.81737
CRY1	0.711768	5.5728	8.19993	1.18253e-05	8.21872e-05	2.74752
DDX20	0.500354	4.92849	8.19613	1.18722e-05	8.23659e-05	2.80716
TSPYL4	0.846297	3.73825	8.19406	1.18978e-05	8.25024e-05	2.99072
ALAS1	0.385302	6.49676	8.19216	1.19214e-05	8.26242e-05	2.66976
DENR	0.4738	6.90737	8.19031	1.19444e-05	8.27419e-05	2.64578
MMGT1	0.539022	5.45593	8.18621	1.19956e-05	8.30555e-05	2.74274
FAM129A	0.954809	7.22676	8.17556	1.21297e-05	8.38156e-05	2.61318
SNAP23	0.446408	6.4245	8.17487	1.21384e-05	8.38338e-05	2.65422
NCAPD3	0.532025	7.0105	8.16809	1.22247e-05	8.43453e-05	2.61531
DFNA5	0.367909	5.74445	8.16158	1.23081e-05	8.47938e-05	2.68883
RTN4	0.324537	8.49791	8.15563	1.2385e-05	8.52388e-05	2.55085
CADPS2	1.14766	3.55433	8.15367	1.24105e-05	8.53713e-05	2.98107
PHLDB2	1.49778	4.00269	8.14929	1.24675e-05	8.5666e-05	2.89105
PPM1D	0.483428	4.37717	8.14895	1.24719e-05	8.5666e-05	2.8284
LSAMP	0.904048	2.24498	8.1465	1.25038e-05	8.58e-05	3.21988
C12orf49	0.353896	8.04958	8.14089	1.25776e-05	8.62206e-05	2.54491
PPIF	0.472154	7.9198	8.13751	1.26222e-05	8.64837e-05	2.54452
GAGE12E	2.74319	-1.65795	8.12599	1.27756e-05	8.73613e-05	3.69204
GHITM	0.330251	7.82931	8.12483	1.27911e-05	8.73911e-05	2.53263
LEO1	0.52325	5.31184	8.12472	1.27926e-05	8.73911e-05	2.68655
PLXNB3	0.576252	5.85202	8.11402	1.29371e-05	8.81162e-05	2.62555
SLC46A3	0.985953	2.0388	8.10773	1.30229e-05	8.85701e-05	3.21175
HES6	0.591423	5.93252	8.10117	1.3113e-05	8.90511e-05	2.60423
JAML	2.12193	-0.386007	8.09192	1.32413e-05	8.97456e-05	3.54267
LSM11	0.630234	3.54433	8.08961	1.32735e-05	8.99198e-05	2.91043
COL4A3BP	0.844161	7.04935	8.0837	1.33563e-05	9.0386e-05	2.51721
ZNF566	0.775841	2.9177	8.0833	1.33619e-05	9.0386e-05	3.026
RP11-384K6.6	0.851156	2.1815	8.07365	1.34986e-05	9.09586e-05	3.14882
HIST2H3A	1.57136	-1.20567	8.07314	1.35058e-05	9.09586e-05	3.60136
HIST2H3C	1.57136	-1.20567	8.07314	1.35058e-05	9.09586e-05	3.60136
DR1	0.503343	7.28891	8.06345	1.36445e-05	9.16869e-05	2.48249
IL11RA	2.89576	-1.2161	8.06327	1.36472e-05	9.16869e-05	3.5915
ADGRB3	5.44837	-2.73736	8.06228	1.36613e-05	9.17374e-05	3.67633
DOCK3	1.43373	0.632142	8.06033	1.36895e-05	9.18494e-05	3.37716
C2CD2L	0.526649	4.40519	8.06021	1.36913e-05	9.18494e-05	2.72308
SLC8A1	2.20762	-1.31536	8.05647	1.37454e-05	9.21227e-05	3.59216
SLC12A1	1.4668	-1.58258	8.05335	1.37908e-05	9.22926e-05	3.60878
STIM1	0.370592	5.93397	8.0527	1.38002e-05	9.23112e-05	2.54869
DGKI	1.16131	1.16124	8.04979	1.38429e-05	9.25515e-05	3.28602
MED29	0.452505	5.73722	8.04885	1.38565e-05	9.2598e-05	2.56089
HYI	0.934998	4.02927	8.04835	1.38639e-05	9.26026e-05	2.77153
LRAT	1.56456	0.579148	8.04481	1.39158e-05	9.28595e-05	3.36744
SAPCD2	0.410563	6.10194	8.04361	1.39335e-05	9.29327e-05	2.52524
MTHFD2	0.436416	6.93544	8.04279	1.39456e-05	9.29683e-05	2.47614
PBRM1	1.12195	6.67168	8.0418	1.39602e-05	9.29904e-05	2.48884
ZNF302	0.705557	3.67274	8.0285	1.4158e-05	9.3886e-05	2.81538
ANKRD52	0.454804	7.87107	8.02505	1.42098e-05	9.41394e-05	2.41722
DCLK2	1.47639	1.59955	8.02095	1.42718e-05	9.45043e-05	3.18555
CYP2J2	1.7793	-1.10907	8.01541	1.43558e-05	9.49243e-05	3.53021
PPP1R3F	0.6051	3.8753	8.01415	1.4375e-05	9.50057e-05	2.76033
PLB1	0.335673	6.80008	8.01147	1.44158e-05	9.52298e-05	2.44719
N4BP3	0.51599	3.89167	8.00126	1.45729e-05	9.60835e-05	2.74251
DPYSL4	2.44669	-2.0067	7.99183	1.47196e-05	9.68657e-05	3.56947
DNM1P47	1.97934	1.14068	7.98988	1.47501e-05	9.70206e-05	3.22161
SKP1	0.483996	6.44343	7.9891	1.47623e-05	9.70544e-05	2.44072
MAPK8IP1	0.775814	4.84278	7.98459	1.48334e-05	9.73827e-05	2.57564
TMOD2	1.05041	4.0332	7.96075	1.52145e-05	9.97428e-05	2.67027
RIC8A	0.456681	6.78194	7.94398	1.54892e-05	0.000101351	2.3702
SEC14L1	0.584153	6.78496	7.93278	1.56755e-05	0.000102468	2.35706
MAOA	3.07459	-1.22179	7.93121	1.57019e-05	0.000102549	3.44744
RBPMS2	0.996753	0.882347	7.92728	1.5768e-05	0.000102932	3.19015
ZNF587B	0.927587	1.73374	7.91811	1.59234e-05	0.000103701	3.04694
SYTL3	0.844953	2.42162	7.91551	1.59676e-05	0.000103891	2.9258
ANKRD54	0.450348	5.83098	7.90842	1.60894e-05	0.000104487	2.39078
C1orf52	0.432897	4.98503	7.90564	1.61374e-05	0.000104749	2.46807
GNAI3	0.483767	7.39798	7.90461	1.61552e-05	0.000104815	2.29441
ISM1	1.33762	0.618055	7.90376	1.61699e-05	0.000104862	3.20288
H2BFS	1.39623	-0.247194	7.90252	1.61915e-05	0.000104952	3.31636
RCAN1	0.46227	7.88125	7.86592	1.68403e-05	0.0001088	2.23254
C1orf216	0.389996	5.71865	7.86546	1.68485e-05	0.000108802	2.35047
ACYP2	0.882192	3.43565	7.86417	1.6872e-05	0.000108903	2.673
ZNF197	0.874045	4.65522	7.86069	1.69352e-05	0.00010926	2.45615
CDK2	0.300938	9.8822	7.85748	1.69939e-05	0.000109572	2.17922
LY6G5C	1.76233	-0.967272	7.85717	1.69994e-05	0.000109572	3.34244
AARS2	0.367775	5.64768	7.85661	1.70098e-05	0.000109588	2.34648
DNAJA4	0.368768	6.91898	7.85295	1.70769e-05	0.000109968	2.25714
UMAD1	0.600174	4.04321	7.85252	1.70847e-05	0.000109968	2.5431
BTN2A2	0.371518	5.35959	7.84861	1.71569e-05	0.00011033	2.36366
PTGS2	3.15598	-1.02187	7.84391	1.72441e-05	0.000110839	3.33279
BBS5	0.446055	4.8033	7.84051	1.73074e-05	0.000111194	2.41338
TRANK1	2.57922	-1.62357	7.82559	1.75882e-05	0.00011284	3.3628
ZBTB47	0.423812	5.08203	7.82229	1.76509e-05	0.00011319	2.36055
GATC	0.396473	5.43358	7.81554	1.77801e-05	0.000113913	2.31804
ZNF713	1.05556	0.877146	7.81231	1.78424e-05	0.000114259	3.05967
PIGCP1	0.758234	1.70253	7.80873	1.79116e-05	0.000114543	2.92616
KCTD2	0.387905	5.57542	7.80695	1.79459e-05	0.000114709	2.29489
ZNF226	0.648176	3.1827	7.79084	1.82617e-05	0.000116297	2.6381
ZNF45	0.884162	3.50102	7.78502	1.83773e-05	0.000116872	2.56767
RPL36AL	0.561388	6.40161	7.78193	1.84388e-05	0.000117209	2.20186
NFASC	0.372552	5.31645	7.77208	1.8637e-05	0.000118306	2.27814
ARF4	0.318746	7.69308	7.76983	1.86825e-05	0.00011854	2.12561
SIGLEC15	2.25658	0.151358	7.76354	1.88106e-05	0.000119298	3.10849
TATDN2	0.360828	5.70322	7.75971	1.8889e-05	0.000119685	2.22788
DCP2	0.495474	6.14522	7.75803	1.89235e-05	0.000119789	2.19014
SNX2	0.357775	7.14192	7.75503	1.89852e-05	0.000120075	2.13091
NABP1	0.452148	4.70912	7.75325	1.9022e-05	0.000120252	2.32307
STXBP3	0.579491	5.50914	7.75277	1.90319e-05	0.00012026	2.23726
NEGR1	1.3101	0.920629	7.74331	1.92288e-05	0.000121006	2.9735
CABLES2	0.742356	3.40531	7.73262	1.94539e-05	0.000122311	2.5254
WIPI2	0.337239	6.51077	7.73033	1.95025e-05	0.000122477	2.13485
FSTL1	0.397299	7.4882	7.73012	1.95069e-05	0.000122477	2.08612
ZNF222	1.07601	0.952926	7.72761	1.95604e-05	0.000122757	2.95032
ZNF71	0.633487	3.76914	7.71477	1.98363e-05	0.000124206	2.43219
RPS27L	0.528719	6.3609	7.71138	1.99096e-05	0.000124569	2.12107
SLAMF8	1.22481	1.10081	7.71126	1.99123e-05	0.000124569	2.90835
ZNF551	1.04494	3.08917	7.70856	1.99711e-05	0.000124868	2.56002
PLA2G16	0.496234	7.09389	7.70097	2.01375e-05	0.000125693	2.06935
PEX11B	0.446842	4.45921	7.69963	2.01669e-05	0.000125763	2.29544
SH3PXD2A	0.844227	6.05011	7.69601	2.02469e-05	0.000126205	2.12373
JADE2	0.322382	6.46491	7.69185	2.03392e-05	0.000126666	2.09185
C6orf226	0.807579	1.46927	7.69142	2.03487e-05	0.000126668	2.82733
PROB1	1.10278	0.369607	7.69052	2.03687e-05	0.000126736	2.99443
PDE3B	1.21275	3.53746	7.68665	2.04551e-05	0.000127159	2.44473
EPHA10	2.00696	0.476486	7.68341	2.05278e-05	0.000127496	2.97088
ELFN2	3.54195	-3.11023	7.67873	2.06333e-05	0.000127997	3.27737
EMC3	0.475215	6.0154	7.6786	2.06363e-05	0.000127997	2.10582
FRMD4A	0.400512	5.71316	7.67556	2.0705e-05	0.000128366	2.12749
TMEM164	0.444485	7.33079	7.67483	2.07215e-05	0.00012841	2.02715
LYPD8	1.34609	0.755224	7.67303	2.07624e-05	0.000128606	2.91737
TPD52L2	0.398936	7.72794	7.67215	2.07826e-05	0.000128616	2.00891
SLC22A15	0.94225	2.79035	7.67173	2.07921e-05	0.000128617	2.5738
BLOC1S2	0.37444	5.37397	7.6711	2.08065e-05	0.000128648	2.15327
TMEM86B	0.792731	2.19804	7.66975	2.08371e-05	0.000128774	2.68012
IGFBP4	0.892756	3.5109	7.66681	2.09045e-05	0.000129081	2.42659
IFI27L2	0.944003	4.82048	7.65788	2.11103e-05	0.000130067	2.19609
GABPB1	0.380647	5.16235	7.65535	2.11691e-05	0.000130133	2.15531
SULT1C2	3.48138	-0.498108	7.65223	2.12416e-05	0.000130521	3.06145
SH3GL2	3.51359	-1.42661	7.63882	2.15568e-05	0.000132222	3.13822
PSMA5	0.610294	6.83874	7.63111	2.17405e-05	0.000133171	1.99941
PHLDB1	0.351671	5.64353	7.62586	2.18663e-05	0.000133882	2.0746
TRPM1	0.382242	6.30355	7.62492	2.18889e-05	0.000133962	2.02178
FAM222A	0.568584	3.79626	7.62338	2.19262e-05	0.000134131	2.31874
BSN	1.2488	1.7207	7.60498	2.23753e-05	0.000136711	2.68519
GMPPB	0.472718	5.74173	7.60122	2.24681e-05	0.000137202	2.03641
NAP1L4	0.352729	8.02286	7.59637	2.25889e-05	0.000137879	1.91
RAB33A	0.581648	5.07689	7.5948	2.26279e-05	0.000138056	2.09198
C1orf54	1.06176	1.30982	7.59194	2.26995e-05	0.000138432	2.73591
RWDD3	0.440923	4.46822	7.59014	2.27447e-05	0.000138646	2.16387
FMR1	0.695963	5.95725	7.57369	2.31621e-05	0.000141004	1.98528
LRIG1	0.901337	2.3887	7.57093	2.32328e-05	0.000141372	2.52895
LZTS1	0.303374	7.78806	7.56769	2.33165e-05	0.000141819	1.8822
BRCC3	0.68136	4.5902	7.56536	2.33767e-05	0.000142021	2.11639
NISCH	0.370658	5.8418	7.56528	2.33788e-05	0.000142021	1.98474
TXLNA	0.327729	8.06965	7.56474	2.33926e-05	0.000142022	1.87087
TPM3P9	0.799384	2.63883	7.55635	2.36109e-05	0.000143097	2.46537
ZNF862	0.597505	3.22008	7.5542	2.36674e-05	0.000143277	2.35109
DGKG	0.651476	3.64253	7.55409	2.36703e-05	0.000143277	2.26605
C10orf11	0.534929	4.71616	7.54771	2.38384e-05	0.000144105	2.0778
SMAD9	0.837632	0.781581	7.54333	2.39544e-05	0.00014468	2.76152
TGFB1	1.30809	0.910303	7.54134	2.40075e-05	0.000144874	2.73918
ESRP2	1.38394	-1.1476	7.54134	2.40075e-05	0.000144874	3.00198
LY6K	1.64509	-1.4542	7.53907	2.40678e-05	0.000145174	3.02707
TMEM198B	1.1224	2.76271	7.53719	2.41183e-05	0.000145415	2.41929
CES5A	2.85622	-2.63936	7.5282	2.43604e-05	0.000146571	3.09388
LPCAT1	0.385157	6.23846	7.52809	2.43631e-05	0.000146571	1.90978
STAP2	3.28591	-0.195124	7.51992	2.45855e-05	0.000147652	2.87185
ZNF416	0.722699	2.12395	7.51571	2.47009e-05	0.000148225	2.51075
PTGES	1.31285	0.713344	7.5084	2.49027e-05	0.000149362	2.73081
ADAM10	0.800124	7.78455	7.49881	2.51702e-05	0.000150859	1.79935
C15orf41	0.649054	3.26005	7.49867	2.51742e-05	0.000150859	2.27652
POLR2A	0.551033	7.72099	7.49059	2.5402e-05	0.000152052	1.79144
CFH	2.45197	-2.21728	7.49044	2.54062e-05	0.000152052	3.02814
RMND5A	0.500036	5.90524	7.47701	2.57899e-05	0.000154215	1.87302
ZFP92	2.03594	0.58454	7.46789	2.60538e-05	0.000155523	2.70246
MLPH	0.426816	6.88974	7.45658	2.63857e-05	0.000157097	1.78679
WEE1	0.627381	6.17591	7.45144	2.65377e-05	0.000157934	1.82141
ZNF823	0.572044	2.63769	7.44937	2.65994e-05	0.000158233	2.33742
DDX55	0.399759	5.69421	7.44777	2.66472e-05	0.000158345	1.85579
GOLGA2P7	0.580454	4.39658	7.44349	2.67753e-05	0.000158938	1.99846
CCNB2	0.373623	6.82631	7.43575	2.70085e-05	0.000160049	1.76483
MCM6	0.374073	7.09098	7.4346	2.70434e-05	0.000160116	1.74976
MDGA2	1.15724	2.62567	7.42648	2.72907e-05	0.000161511	2.31207
PLPP7	1.47919	0.82049	7.41793	2.75541e-05	0.000163	2.60677
ARHGAP26	0.690579	3.246	7.41456	2.76585e-05	0.000163408	2.17788
FREM2	2.22679	-1.73479	7.41058	2.77825e-05	0.00016407	2.90262
TMEM251	0.407517	5.59777	7.40508	2.79551e-05	0.000164878	1.81258
GAREM1	0.583474	2.96744	7.40173	2.80604e-05	0.00016538	2.21734
VPS39	0.36378	6.12316	7.39844	2.81645e-05	0.0001659	1.76064
GPR89A	0.516897	4.35352	7.39716	2.82051e-05	0.000166069	1.94887
GADD45G	2.00443	0.656875	7.39329	2.83284e-05	0.000166724	2.6027
PLCG1	0.350081	7.42243	7.39063	2.84132e-05	0.000167009	1.68093
ARMC5	0.618705	3.75679	7.3832	2.86521e-05	0.000168056	2.03739
SLC6A16	1.47697	-0.330745	7.38229	2.86815e-05	0.000168157	2.72706
ZNF813	1.10081	1.02184	7.37711	2.88495e-05	0.000168999	2.5261
ZNF584	0.531754	3.64704	7.37551	2.89017e-05	0.000169161	2.04958
HIST1H2AL	1.51088	0.0799089	7.36462	2.92592e-05	0.000170979	2.65249
CASC4	0.5174	5.58909	7.36344	2.92981e-05	0.000171118	1.76255
ARL1	0.316793	6.38496	7.34764	2.9826e-05	0.000173654	1.68151
CDK11A	0.391606	5.00332	7.34744	2.98328e-05	0.000173654	1.80055
TMEM106A	1.06922	0.281292	7.34695	2.98492e-05	0.000173676	2.60315
BCAP31	0.581767	7.98565	7.34658	2.98619e-05	0.000173677	1.60832
ZC4H2	0.746344	3.14218	7.34507	2.99129e-05	0.0001739	2.11419
FAM212A	1.62008	0.766312	7.3402	3.00781e-05	0.000174787	2.52217
MTCH2	0.381718	7.32893	7.3393	3.01087e-05	0.000174891	1.62211
KIF13B	0.577491	5.74727	7.33277	3.03323e-05	0.000175894	1.71081
FAM161A	0.544951	4.01609	7.33136	3.03809e-05	0.000176102	1.92555
EIF1B	0.363592	5.46365	7.33069	3.04039e-05	0.000176162	1.73402
HIST2H2AA4	2.57042	3.40165	7.32872	3.04719e-05	0.000176363	2.04199
ZNF784	0.778191	2.16803	7.32857	3.0477e-05	0.000176363	2.27756
SHMT2	0.476137	7.9593	7.32724	3.05229e-05	0.000176481	1.5853
TMED2	0.319658	8.38151	7.32388	3.06396e-05	0.000177081	1.5706
ZNF470	0.805027	3.04356	7.313	3.10201e-05	0.000179013	2.09452
COMMD9	0.616452	5.71923	7.31247	3.10385e-05	0.000179013	1.68835
PGS1	0.469607	5.14913	7.30971	3.11359e-05	0.000179349	1.7389
TESPA1	2.4049	-1.73008	7.30819	3.11899e-05	0.000179511	2.78347
KIF13A	0.789447	5.35101	7.30646	3.12513e-05	0.000179789	1.71489
HIST1H3C	1.53092	0.390523	7.29972	3.14914e-05	0.000181046	2.53063
LONRF1	0.556335	7.07709	7.29959	3.1496e-05	0.000181046	1.58529
SPRY4	0.474655	4.92581	7.29472	3.16709e-05	0.000181976	1.74463
IRGQ	0.52046	5.70562	7.29341	3.17182e-05	0.000182096	1.6661
FAM13B	0.76506	5.42172	7.29227	3.17591e-05	0.000182255	1.69073
ZNF573	2.16548	-0.69569	7.28591	3.19897e-05	0.000183503	2.65616
PARVA	0.291793	6.93553	7.28468	3.20348e-05	0.000183609	1.57416
CCDC149	0.888563	1.78068	7.28416	3.20537e-05	0.000183641	2.29062
MCL1	0.487131	7.60017	7.27628	3.23424e-05	0.000185141	1.53369
SFXN5	0.537173	4.05483	7.27429	3.24161e-05	0.000185256	1.84866
ERAP2	0.951969	0.730916	7.27306	3.24615e-05	0.000185375	2.44672
WHAMMP2	1.41155	-1.61049	7.26962	3.25889e-05	0.000186012	2.72831
TSSK5P	0.968625	1.20587	7.26074	3.29206e-05	0.000187596	2.35604
LTA4H	0.370807	6.06454	7.25477	3.31456e-05	0.000188722	1.58853
HIST2H2BF	1.56838	-0.836534	7.24539	3.35026e-05	0.000190457	2.62372
SEPHS2	0.294113	6.91878	7.24532	3.35054e-05	0.000190457	1.52641
ZDHHC3	0.343313	5.96768	7.24384	3.35621e-05	0.000190701	1.58267
HAUS2	0.522517	5.63408	7.24317	3.35878e-05	0.000190768	1.61055
ZNF571	0.829806	1.93616	7.24124	3.3662e-05	0.0001911	2.21172
AC125232.1	0.698928	2.49863	7.24059	3.36868e-05	0.0001911	2.10955
DKC1	0.334409	6.7887	7.23774	3.37968e-05	0.00019164	1.52387
RITA1	0.532325	5.56186	7.22589	3.42584e-05	0.00019386	1.59569
SUCLG2	0.400269	6.45743	7.22366	3.43457e-05	0.000194036	1.52447
ALMS1P1	0.936287	0.568658	7.22321	3.43633e-05	0.000194056	2.41142
CD47	0.2991	6.41749	7.22281	3.43791e-05	0.000194065	1.5257
ZNF761	0.532545	3.09562	7.21832	3.45567e-05	0.000194542	1.96798
CDK11B	0.376416	6.6325	7.21295	3.477e-05	0.000195473	1.50145
ZDBF2	1.77994	0.946975	7.21179	3.48162e-05	0.000195554	2.33805
ERFE	0.809255	3.15145	7.21152	3.48268e-05	0.000195554	1.94849
PLEKHG2	0.48623	4.46952	7.21115	3.48418e-05	0.000195559	1.70238
ICA1	1.62197	0.821164	7.20796	3.49692e-05	0.000196035	2.35345
OCA2	0.278504	7.49726	7.20494	3.50907e-05	0.000196477	1.44918
ALDH1A2	1.48804	-0.935099	7.20155	3.52274e-05	0.000196923	2.58216
ZNF230	0.783128	1.37526	7.19608	3.54492e-05	0.000198002	2.2498
NFATC3	0.650546	5.84315	7.19458	3.55106e-05	0.000198179	1.53187
TMEM54	0.85518	3.34783	7.19425	3.55238e-05	0.000198179	1.88754
USE1	0.949718	4.36466	7.19067	3.56704e-05	0.000198836	1.69327
EMC3-AS1	0.650443	2.1841	7.18997	3.56989e-05	0.000198915	2.10506
CYB5B	0.285382	7.71871	7.18921	3.57302e-05	0.000199009	1.42174
ZNF285	1.16733	-0.908289	7.17181	3.64523e-05	0.000202949	2.54364
ZNF749	0.981035	2.00293	7.17119	3.64786e-05	0.000203011	2.11404
PCSK1	1.27651	1.2035	7.16766	3.66271e-05	0.000203594	2.24269
HTN1	1.57216	-0.272831	7.16454	3.67589e-05	0.000204244	2.45923
MYEF2	0.355343	5.09028	7.16371	3.67938e-05	0.000204356	1.56437
ZFP3	1.92011	-0.0984021	7.14965	3.7395e-05	0.000207278	2.41821
ARL6IP5	0.345326	6.47909	7.1427	3.76961e-05	0.000208696	1.42246
RAC1	0.309984	8.48358	7.13958	3.78322e-05	0.000209261	1.33973
FOXK1	0.545075	5.96068	7.13897	3.78588e-05	0.000209261	1.45282
AGMAT	1.89149	0.656219	7.12661	3.84034e-05	0.000212017	2.27996
VMP1	0.333218	6.94169	7.12374	3.85311e-05	0.000212467	1.37386
RPUSD4	0.36794	5.03366	7.12054	3.86739e-05	0.000213169	1.51642
ZNF667	0.853786	2.19385	7.11258	3.9032e-05	0.000214972	2.00757
NUDT4	0.508243	7.52611	7.11136	3.9087e-05	0.000215189	1.33128
NSUN4	0.31884	5.82584	7.10884	3.92014e-05	0.000215733	1.42634
CYTH3	0.44452	7.73364	7.10763	3.92565e-05	0.00021595	1.31932
CDC42BPG	1.57682	1.41013	7.10346	3.94466e-05	0.000216587	2.1301
RAP2C	0.524701	5.03612	7.10223	3.95027e-05	0.000216786	1.49322
CPT2	0.385822	6.16865	7.10138	3.95417e-05	0.000216868	1.39003
GPR176	0.736893	2.2608	7.10106	3.95565e-05	0.000216868	1.98109
APLNR	0.769683	3.52758	7.10088	3.95648e-05	0.000216868	1.73486
STXBP5L	1.64091	0.275993	7.09997	3.96066e-05	0.000217011	2.30493
KHDC1	1.59132	-0.24113	7.09795	3.96993e-05	0.000217347	2.37424
CBX6	0.352593	7.55903	7.09516	3.98279e-05	0.000217965	1.30971
TCP10L	1.66577	-1.71067	7.08803	4.01585e-05	0.000219426	2.52194
ZNF271P	0.346378	5.19322	7.08568	4.02684e-05	0.00021994	1.45609
CYP39A1	0.926725	1.23663	7.08523	4.02895e-05	0.000219968	2.13574
ZNF587	0.609051	3.51892	7.08473	4.0313e-05	0.000220009	1.71641
RBBP9	0.408814	4.78427	7.08278	4.04044e-05	0.000220421	1.49826
CEACAMP5	1.35798	-0.0975536	7.07857	4.06026e-05	0.000221286	2.33143
SWAP70	0.616518	6.95383	7.07839	4.06111e-05	0.000221286	1.3163
VSIG10	0.507268	3.62962	7.07075	4.09731e-05	0.000223083	1.67645
RAB8B	0.703324	6.50627	7.06791	4.11085e-05	0.000223663	1.32713
AKT2	0.372295	7.51661	7.06784	4.11121e-05	0.000223663	1.27693
CRY2	0.620353	3.80712	7.06239	4.13734e-05	0.000224908	1.631
KIF21B	0.831492	1.47521	7.05767	4.16015e-05	0.000225881	2.06266
ACSS3	0.743906	2.83826	7.05493	4.17344e-05	0.000226513	1.81502
GDI1	0.425566	7.55774	7.0534	4.18089e-05	0.000226829	1.2572
ULK4	0.681649	1.64339	7.0494	4.20039e-05	0.000227708	2.02449
POC1B-GALNT4	1.18799	1.38241	7.04865	4.20405e-05	0.000227817	2.06663
PIGG	0.426457	4.92672	7.03974	4.24794e-05	0.000229925	1.42695
NAA10	0.588778	6.05385	7.03437	4.27465e-05	0.000231099	1.31399
GINS4	0.362003	5.47414	7.03285	4.28226e-05	0.00023142	1.36241
HIST1H2AE	1.08929	1.24946	7.02455	4.32396e-05	0.000233399	2.05832
ZNF775	0.497495	5.74724	7.01594	4.36768e-05	0.000235024	1.31618
FBXO25	0.34141	4.735	7.00559	4.42088e-05	0.000237517	1.40733
LINC00888	0.363001	4.72329	6.99967	4.45164e-05	0.000238545	1.40134
ZNF286A	0.505014	3.46851	6.99817	4.45946e-05	0.000238847	1.6178
KLHL6	0.614547	2.81563	6.98757	4.51518e-05	0.000241456	1.73472
NBPF20	1.41516	4.2436	6.98114	4.54934e-05	0.000243001	1.45019
COPS2	0.432773	6.43607	6.97546	4.57979e-05	0.000244061	1.21418
VPS35	0.359288	8.34408	6.97457	4.58455e-05	0.000244221	1.13495
DSN1	0.356672	5.80369	6.96758	4.62236e-05	0.000245853	1.24999
ZNF726	0.725104	1.38255	6.96131	4.65652e-05	0.000247196	1.95751
EIF4E3	0.769552	2.75304	6.95788	4.67536e-05	0.000248006	1.7092
LRRN1	3.29094	-0.700448	6.95623	4.68442e-05	0.000248296	2.25807
ZNF561	0.520758	4.2636	6.9543	4.69509e-05	0.00024867	1.4128
LURAP1	0.510151	3.19198	6.94191	4.76406e-05	0.000251937	1.60294
C11orf58	0.293707	7.644	6.9393	4.77871e-05	0.000252615	1.10938
CPNE8	0.597676	4.64425	6.93816	4.78514e-05	0.000252848	1.33395
XKR9	1.75854	-1.54074	6.92924	4.83573e-05	0.000255044	2.31485
MFSD14A	0.351069	6.622	6.92707	4.8481e-05	0.000255599	1.14219
LINC00094	0.513276	4.33175	6.92353	4.86841e-05	0.000256482	1.36246
RP11-96C23.11	1.11973	-0.369024	6.91486	4.91848e-05	0.000258914	2.16575
NBPF12	0.888396	3.58059	6.91058	4.94343e-05	0.00025993	1.48395
PIGB	0.400709	4.40959	6.90923	4.95132e-05	0.000260246	1.33201
PRPS2	0.333801	5.75307	6.90597	4.97043e-05	0.000261052	1.17585
GPR137C	1.15901	1.46177	6.90499	4.97621e-05	0.000261256	1.87361
PAQR6	1.74909	-0.121685	6.90386	4.98285e-05	0.000261505	2.11907
ZNF8	0.612086	3.44652	6.90324	4.98649e-05	0.000261542	1.50191
NRIP3	0.475193	4.29195	6.89344	5.04466e-05	0.000264247	1.33054
GMFG	0.915228	3.15604	6.89207	5.05284e-05	0.000264575	1.54683
SEPT7P2	0.581278	2.68991	6.88629	5.08752e-05	0.00026629	1.63048
SCN5A	1.57068	-0.438991	6.88514	5.09449e-05	0.000266554	2.13785
CGNL1	3.41152	-3.04777	6.88092	5.11998e-05	0.000267394	2.36763
PLA2G12A	0.345555	4.99122	6.88088	5.12024e-05	0.000267394	1.21772
SMIM10L1	0.309451	5.49748	6.87927	5.13002e-05	0.000267804	1.16489
PRCD	2.3972	-1.34798	6.86774	5.20067e-05	0.000271058	2.22058
PTBP2	0.64412	4.44645	6.86502	5.21746e-05	0.00027165	1.2697
FAM50A	0.61981	7.10487	6.86471	5.21942e-05	0.00027165	1.03702
LAMB2	0.362474	7.8335	6.86272	5.23174e-05	0.00027216	1.00531
PCGF6	0.556719	4.10209	6.85719	5.26618e-05	0.000273568	1.31631
ZNF527	0.710872	1.78703	6.85115	5.30415e-05	0.000275437	1.75064
EXO1	0.367548	5.79711	6.85024	5.30987e-05	0.000275527	1.10061
RAB5B	0.36588	7.51453	6.84662	5.33278e-05	0.000276612	0.995442
UNC119B	0.467431	5.91394	6.84554	5.33963e-05	0.000276863	1.08458
NAP1L3	2.59083	-0.708896	6.83105	5.43249e-05	0.00028073	2.1041
NBPF8	0.525008	4.9587	6.83031	5.43734e-05	0.000280875	1.1565
FAM127A	0.520849	6.54941	6.82722	5.45734e-05	0.000281487	1.01815
INSC	0.933155	1.47878	6.82137	5.49558e-05	0.000283142	1.76478
POLR3B	0.621041	4.22566	6.8174	5.52162e-05	0.000284166	1.24408
POLR2M	0.61938	6.12684	6.81481	5.53873e-05	0.00028494	1.02842
H2AFZ	0.393806	9.96927	6.80064	5.63321e-05	0.000289155	0.878691
SLC25A44	0.328254	5.58461	6.79832	5.64882e-05	0.000289848	1.0527
CCDC106	0.7478	4.62095	6.79789	5.65176e-05	0.000289892	1.15751
TIGD2	0.573565	3.93071	6.78991	5.7059e-05	0.000292343	1.26081
PIM1	0.445511	4.00386	6.78641	5.72987e-05	0.000293311	1.24278
SPAG5	0.327876	6.93607	6.77709	5.79412e-05	0.000295984	0.932701
ZNF493	0.705669	1.75538	6.77404	5.81533e-05	0.000296739	1.65765
HNRNPUL1	0.259446	8.72615	6.76808	5.85705e-05	0.000298647	0.861135
EFNA5	1.63056	0.910029	6.76016	5.91292e-05	0.000300966	1.78064
PPARGC1A	0.86332	5.73194	6.76009	5.91343e-05	0.000300966	0.989913
ZNF473	0.373388	4.31219	6.75623	5.94086e-05	0.000302028	1.15071
FLNA	0.337696	10.2537	6.75476	5.95136e-05	0.000302451	0.814779
PPM1L	0.968028	3.42225	6.75233	5.96877e-05	0.00030289	1.3132
UPF3B	0.404442	5.36483	6.74944	5.9895e-05	0.000303718	1.01002
ID2	0.412033	5.95348	6.74822	5.9983e-05	0.000304053	0.955638
TM4SF19-TCTEX1D2	1.16791	1.49319	6.7435	6.03236e-05	0.000305556	1.66286
SLC6A15	0.485797	5.80408	6.7353	6.09215e-05	0.000308471	0.951455
CAPRIN1	0.446303	8.25492	6.7317	6.11856e-05	0.000309694	0.824817
CERKL	0.957427	-0.0208395	6.72927	6.13648e-05	0.000310488	1.88544
NRBF2	0.309518	5.30577	6.72111	6.19709e-05	0.00031321	0.978986
CD274	1.46175	-0.468479	6.71993	6.20592e-05	0.000313542	1.9345
GINS3	0.326913	5.04661	6.71395	6.25077e-05	0.000315692	0.996133
C3orf67	0.726062	2.81677	6.70798	6.29589e-05	0.000317739	1.37714
HOXB2	2.49033	-0.594686	6.70754	6.29922e-05	0.000317791	1.93498
ELOVL4	2.36712	-1.70315	6.70013	6.35582e-05	0.000320376	2.04791
LRMP	4.61159	-2.58856	6.69992	6.35742e-05	0.000320376	2.12077
RPAP2	0.408104	5.20397	6.69125	6.42438e-05	0.000323514	0.950142
MAPK14	0.380548	6.32956	6.69004	6.43377e-05	0.000323869	0.853011
CCDC109B	0.423772	3.53758	6.68827	6.44753e-05	0.000324325	1.20653
MCM4	0.311345	8.08594	6.6819	6.49732e-05	0.000326473	0.764104
EXT2	0.282593	6.50695	6.67847	6.52433e-05	0.000327711	0.827494
PGRMC1	0.322993	6.84287	6.67765	6.53087e-05	0.00032792	0.808208
JAG1	0.890607	8.58154	6.67484	6.55307e-05	0.000328916	0.742951
SLC39A13	0.52134	5.99652	6.67037	6.58861e-05	0.000330413	0.850749
HS2ST1	0.688402	6.63295	6.66353	6.64346e-05	0.000332727	0.800938
ITPKB	0.422026	8.82064	6.65778	6.68989e-05	0.00033467	0.715273
ZZZ3	0.671044	6.24037	6.65765	6.69095e-05	0.00033467	0.816246
TMED5	0.507445	7.13843	6.65723	6.69437e-05	0.00033467	0.766234
CD58	0.385206	4.22854	6.65572	6.70663e-05	0.00033504	1.03384
LAGE3	0.667052	6.17201	6.65382	6.72207e-05	0.00033569	0.815954
ICMT	0.243636	8.70757	6.65111	6.74424e-05	0.000336535	0.709025
EIF3EP1	1.9219	-2.36129	6.64523	6.79248e-05	0.000338228	2.03649
FAM53B	0.301676	6.72805	6.6448	6.79605e-05	0.000338284	0.771283
REEP5	0.267431	7.37458	6.64332	6.80825e-05	0.000338647	0.737061
ZNF701	1.18735	1.48902	6.63009	6.9186e-05	0.000343641	1.5172
RRAGB	0.594423	2.99294	6.62769	6.93877e-05	0.000344519	1.23822
AGO1	0.341078	6.06256	6.62391	6.97072e-05	0.000345981	0.784608
KLHL41	0.835574	0.817084	6.62054	6.9994e-05	0.000347265	1.61657
SNX19	0.61408	6.1099	6.62028	7.00162e-05	0.000347265	0.776312
FNBP4	0.504532	6.32695	6.61739	7.02625e-05	0.000348237	0.757985
OAT	0.299877	7.68269	6.61531	7.04405e-05	0.000348869	0.688421
CNOT10	0.357744	4.91983	6.6148	7.04849e-05	0.000348963	0.880715
FAM81A	0.361577	4.95032	6.61322	7.06203e-05	0.000349508	0.875142
ID1	0.712284	3.18273	6.60406	7.14125e-05	0.00035305	1.16922
TNRC18P1	1.54495	-2.01525	6.59628	7.20931e-05	0.000356287	1.94668
SMURF1	0.334842	6.06009	6.59394	7.22996e-05	0.000357073	0.745353
C16orf45	0.518129	3.51954	6.59389	7.23039e-05	0.000357073	1.08683
ZNF252P	0.719852	3.88209	6.59302	7.23807e-05	0.000357324	1.01364
SLITRK5	1.94125	-2.02842	6.58712	7.29039e-05	0.000359137	1.93635
ERC2	4.06913	-2.94046	6.58618	7.29872e-05	0.000359297	2.00419
AP5B1	0.33669	5.12521	6.58066	7.34815e-05	0.000361596	0.813243
CCDC91	0.344475	4.81638	6.57938	7.35965e-05	0.000362033	0.846416
DCLRE1B	0.419239	4.80522	6.57136	7.4321e-05	0.000364688	0.83727
ARID5B	0.526394	4.77656	6.56855	7.45776e-05	0.000365557	0.837264
PRELID2	0.737605	1.94183	6.56743	7.46798e-05	0.000365928	1.35759
KLHL7	0.390265	5.24169	6.56622	7.47903e-05	0.00036634	0.782264
SLC24A5	0.455166	6.51199	6.56283	7.51012e-05	0.000367407	0.675177
NT5C3A	0.387973	5.11506	6.56268	7.51145e-05	0.000367407	0.790585
ERVK3-1	0.646308	5.85838	6.56002	7.53599e-05	0.000368086	0.716991
RNF187	0.40506	7.45791	6.55862	7.54894e-05	0.000368588	0.621925
FMNL3	0.329462	5.42496	6.55501	7.58231e-05	0.000369956	0.749638
SLC7A7	1.2991	0.382372	6.54891	7.6392e-05	0.000372337	1.59367
BLOC1S3	0.390905	4.25663	6.54553	7.67098e-05	0.000373754	0.884259
PPP1R10	0.288356	6.16861	6.54396	7.6857e-05	0.000374207	0.671485
CEP70	0.531658	4.37606	6.54353	7.68977e-05	0.000374273	0.862179
BBS9	0.459931	4.13458	6.54278	7.6969e-05	0.000374357	0.901263
AMY2B	1.15283	0.886169	6.53905	7.73219e-05	0.000375676	1.4993
ZNF224	0.804803	2.79933	6.53558	7.76519e-05	0.000377147	1.1552
HEY1	0.425816	3.92638	6.53474	7.77317e-05	0.000377402	0.92836
LRRC47	0.273606	6.83153	6.53111	7.80791e-05	0.000378549	0.615835
RBAK	0.779185	4.46597	6.52901	7.82802e-05	0.000379265	0.828857
OIP5	0.436946	4.38852	6.52715	7.84591e-05	0.000379947	0.838552
ANXA6	0.363109	8.20096	6.52207	7.89504e-05	0.000381575	0.550603
EPHB1	1.62388	-1.03656	6.51954	7.91962e-05	0.000382629	1.74912
RRP8	0.375393	4.55545	6.51881	7.92676e-05	0.00038284	0.801959
SLC1A5	0.39277	7.19569	6.51826	7.93219e-05	0.000382969	0.580152
ZNF814	1.36666	1.06721	6.50955	8.01762e-05	0.000386418	1.43049
TMEM185A	0.365908	5.04784	6.50753	8.03755e-05	0.000387243	0.724603
RP3-403A15.5	3.84288	-0.309267	6.50592	8.05344e-05	0.000387874	1.6394
PEX12	0.741873	2.22541	6.50343	8.07824e-05	0.000388797	1.22209
CYCS	0.259755	8.49362	6.498	8.13246e-05	0.000391134	0.511595
LONP2	0.331924	7.67729	6.49444	8.16815e-05	0.00039244	0.528627
LGALS3BP	0.562283	8.4159	6.48753	8.23802e-05	0.000395385	0.499483
LRRK2	0.705383	2.53155	6.48195	8.295e-05	0.000397981	1.13591
EID2	0.337994	4.882	6.47846	8.3308e-05	0.000399422	0.704709
ZBED5	0.385371	4.61307	6.47794	8.33613e-05	0.000399539	0.739291
ZNF215	1.18346	2.02196	6.47733	8.34242e-05	0.000399701	1.2248
ANKRD39	0.515751	5.57867	6.47705	8.34533e-05	0.000399702	0.631766
PDE4B	0.393962	7.11134	6.47572	8.35898e-05	0.000400217	0.52766
PRIM2	0.300213	5.15376	6.47492	8.36728e-05	0.000400476	0.670083
CTSZ	0.456953	8.94618	6.47217	8.3957e-05	0.000401697	0.467097
ACP5	0.57418	5.48116	6.46976	8.42074e-05	0.000402755	0.631144
LPIN3	0.480954	3.39296	6.46278	8.49377e-05	0.000405839	0.939546
PPM1H	0.517496	6.49356	6.45421	8.58428e-05	0.000408882	0.531859
RGMB	0.45253	5.18467	6.45391	8.58746e-05	0.000408882	0.638857
MAD1L1	0.56901	7.74013	6.45364	8.59028e-05	0.000408882	0.472176
GBP3	1.20545	0.888551	6.4494	8.63552e-05	0.000410611	1.38142
MGAT2	0.391586	5.59692	6.44893	8.64058e-05	0.00041071	0.592583
ACAT2	0.304918	7.70148	6.44442	8.68897e-05	0.000412584	0.461087
NUP62	0.260748	7.02254	6.44224	8.71242e-05	0.000413271	0.487478
RAB21	0.341681	5.60657	6.43846	8.75338e-05	0.000414818	0.57771
ADGRL2	3.52268	-2.53412	6.4384	8.75402e-05	0.000414818	1.79097
DTX3	1.02687	0.902857	6.43561	8.78437e-05	0.000416113	1.36086
C11orf96	0.474157	5.79504	6.43458	8.79556e-05	0.0004165	0.555651
CXorf40B	0.519904	4.60091	6.43393	8.80267e-05	0.000416694	0.682346
FST	1.69338	-1.25338	6.43227	8.82077e-05	0.000417398	1.66159
JAM3	0.267001	6.42556	6.42861	8.86095e-05	0.000418878	0.501486
TTLL5	0.316034	5.1097	6.42833	8.86402e-05	0.00041888	0.612503
FAM102B	0.727852	6.95454	6.42614	8.88821e-05	0.00041988	0.469419
WIPF1	0.508503	7.65694	6.4211	8.94397e-05	0.000422369	0.43132
ETV5	0.431592	7.72806	6.42056	8.9499e-05	0.000422505	0.42828
ANP32E	0.521941	7.23146	6.41946	8.96216e-05	0.000422939	0.446598
CSDE1	0.428868	8.71184	6.41325	9.03162e-05	0.000425636	0.393383
TYW5	0.397023	4.13545	6.40646	9.10812e-05	0.000429094	0.719706
ARIH2	0.283952	6.86103	6.406	9.11335e-05	0.000429194	0.447341
FAM174A	0.481345	3.89534	6.40025	9.1788e-05	0.000431541	0.755256
MTRF1L	0.269474	5.77861	6.3996	9.18625e-05	0.000431744	0.51018
ICK	0.767959	5.23508	6.39829	9.20122e-05	0.000432007	0.559313
HIST1H2AI	1.35265	-0.205389	6.39444	9.24539e-05	0.000433639	1.47963
ABHD3	0.421431	4.47551	6.39121	9.28265e-05	0.000434991	0.643642
GPRC5B	0.273445	5.62895	6.38091	9.40263e-05	0.000439679	0.498478
KIF26A	2.42625	-1.2849	6.38089	9.40281e-05	0.000439679	1.59863
HNRNPUL2	0.327165	8.37596	6.37998	9.41351e-05	0.000439983	0.356375
CELSR3	0.610866	3.31261	6.37756	9.44194e-05	0.000440911	0.842307
ZNF616	0.924145	3.21971	6.37576	9.46324e-05	0.000441756	0.858989
RP11-64B16.2	2.2497	-1.34249	6.3729	9.49701e-05	0.000443183	1.59468
ZNF547	1.23783	0.435593	6.36742	9.56229e-05	0.000445778	1.34743
SNX21	0.483016	4.29083	6.36218	9.62497e-05	0.000448548	0.633975
ABHD12B	1.19891	0.594738	6.34465	9.8383e-05	0.00045741	1.29158
CTSA	0.481418	8.9752	6.34355	9.85188e-05	0.000457887	0.293756
TBC1D1	0.332877	4.66569	6.3417	9.87476e-05	0.000458642	0.549167
CA14	0.401589	6.95141	6.33785	9.92249e-05	0.000460704	0.35077
MDK	1.34188	-0.12236	6.33631	9.94163e-05	0.000461437	1.39123
CAPN7	0.576857	5.33133	6.32972	0.000100241	0.000464639	0.457442
MAATS1	1.71439	-1.91627	6.32932	0.00010029	0.000464713	1.59759
TRAPPC2B	0.740789	2.35717	6.32442	0.000100908	0.000467107	0.959071
MCTP1	0.626603	4.77068	6.32375	0.000100993	0.000467344	0.511049
PLCB1	1.09276	1.60486	6.32179	0.000101243	0.00046834	1.09107
FAM3A	0.454988	5.13713	6.32116	0.000101322	0.000468549	0.465426
HIST1H2BG	1.58996	0.945921	6.32034	0.000101427	0.00046872	1.20073
CEBPG	0.378765	5.20111	6.31946	0.000101538	0.000468923	0.456491
SLIT3	0.603494	1.99179	6.3075	0.000103075	0.000475701	1.00394
KIF2C	0.243032	8.02441	6.30497	0.000103403	0.000477054	0.263787
MDH1B	1.18269	-0.552691	6.30141	0.000103867	0.000478718	1.40492
SPR	0.500273	5.41614	6.29881	0.000104207	0.000480123	0.407426
ZFP36L2	0.429863	6.78985	6.29138	0.000105185	0.000484307	0.296367
C3orf38	0.428161	4.12032	6.29045	0.000105308	0.000484552	0.566072
VPS33A	0.292318	5.85214	6.28883	0.000105524	0.000485219	0.354237
WDR81	0.280803	7.34366	6.28477	0.000106065	0.000486808	0.259644
RNF34	0.309053	5.27758	6.28465	0.000106081	0.000486808	0.401706
EYA3	0.303227	6.37536	6.26803	0.000108326	0.000496454	0.287709
ETAA1	0.47145	4.21783	6.26389	0.000108893	0.000498722	0.513321
TMEM97	0.306859	6.63248	6.25809	0.000109694	0.000502221	0.259554
COL4A5	0.717183	3.21902	6.25002	0.000110817	0.000507028	0.6895
IFITM10	1.55983	0.521556	6.24886	0.000110979	0.000507603	1.17575
EIF2AK1	0.256657	7.2465	6.2466	0.000111297	0.000508886	0.212129
SPIDR	0.318536	4.86589	6.24557	0.000111442	0.000509214	0.392947
BRD2	0.246589	8.08009	6.24014	0.00011221	0.000512045	0.174145
DKK2	0.983527	0.0367081	6.23939	0.000112316	0.000512191	1.23905
MSANTD2	0.498006	3.09691	6.23877	0.000112405	0.000512426	0.699136
TNFRSF10A	0.845692	2.79794	6.23762	0.000112569	0.000513002	0.756932
DRD2	2.17773	-0.826739	6.23441	0.000113026	0.00051458	1.35192
TMEM110	0.32854	5.14464	6.23185	0.000113395	0.000516085	0.343303
SLC35A3	0.594309	4.87056	6.22774	0.000113987	0.000518438	0.368076
LGALS8	0.266096	6.26684	6.22567	0.000114286	0.00051915	0.236665
DNAJB2	0.470907	5.81695	6.22446	0.00011446	0.000519668	0.26966
PELI2	0.77107	4.01385	6.22431	0.000114483	0.000519668	0.495261
ARSG	0.318287	5.49814	6.22101	0.000114962	0.00052167	0.293804
ITFG1	0.280935	6.02894	6.21957	0.000115173	0.000522457	0.245352
CC2D1B	0.313691	6.75975	6.21306	0.000116127	0.000526095	0.191234
FOLH1	1.10792	0.484611	6.20633	0.000117123	0.000530258	1.12465
PRR26	1.37449	0.955409	6.20548	0.000117249	0.000530482	1.04497
ULK1	0.307887	5.11787	6.20233	0.00011772	0.000532262	0.305795
IL10	2.37018	-2.24155	6.20159	0.000117829	0.000532543	1.46212
REEP3	0.365486	5.4031	6.19827	0.000118329	0.000534491	0.271682
ANKMY2	0.483424	4.59947	6.19782	0.000118396	0.000534621	0.363198
TMEM86A	0.719067	2.6436	6.19536	0.000118766	0.000535768	0.729471
NXPH4	1.28176	-0.845821	6.19219	0.000119247	0.000537057	1.29827
ZHX3	0.522601	4.6364	6.19071	0.00011947	0.000537888	0.348094
MMP16	0.847956	1.9582	6.18359	0.000120557	0.000542427	0.842471
PITRM1	0.227812	8.21169	6.18305	0.00012064	0.000542626	0.0926757
OXNAD1	0.341576	4.47754	6.18264	0.000120704	0.000542734	0.360461
RTF1	0.468744	6.31308	6.17754	0.000121489	0.000546089	0.167895
MCOLN2	1.11479	0.449563	6.17645	0.000121658	0.000546668	1.09008
RPA2	0.397414	7.0427	6.17488	0.000121901	0.000547405	0.124059
CCDC15	1.07132	2.74525	6.17108	0.000122494	0.000549532	0.676582
PPP1R12C	0.40703	6.14402	6.17035	0.000122607	0.000549862	0.16934
CEP164	0.353115	5.18654	6.16796	0.000122981	0.00055136	0.251502
ZNF227	0.575914	3.25805	6.16395	0.000123612	0.000553777	0.564107
TRIM60P18	1.68138	-2.31053	6.16376	0.000123641	0.000553777	1.41891
PMEL	0.474244	13.6967	6.16144	0.000124008	0.000555242	-0.0136237
EPB41	0.371946	6.74351	6.15816	0.000124527	0.000557207	0.116807
WDPCP	0.470155	3.0552	6.15761	0.000124615	0.000557419	0.596875
JPH4	3.26304	-2.07137	6.15593	0.000124883	0.000557857	1.38644
ZNF391	0.720174	1.92486	6.15547	0.000124955	0.000557857	0.810159
ARCN1	0.419116	7.47029	6.14891	0.000126007	0.000562189	0.0684582
STMN1	0.325848	9.40048	6.14491	0.000126652	0.000564518	0.0138655
ZNF141	0.94441	1.36209	6.14097	0.000127292	0.000566458	0.888294
ZSCAN18	2.36057	-1.62167	6.13864	0.000127672	0.000567599	1.3179
CASP9	0.432386	3.98471	6.12867	0.00012931	0.000573407	0.369563
ATPIF1	0.44645	6.70606	6.12656	0.000129658	0.000574766	0.0753076
SLC9A1	0.379829	6.05415	6.12607	0.00012974	0.000574944	0.114996
IRAK2	1.00595	-0.147987	6.12411	0.000130066	0.000576201	1.1117
MKRN2	0.289999	5.84482	6.12184	0.000130445	0.000577653	0.126353
TMEM50A	0.298962	7.07008	6.12134	0.000130529	0.000577698	0.0489317
IDUA	0.799307	2.03474	6.12028	0.000130705	0.000578108	0.742215
ISCU	0.433626	5.21604	6.11891	0.000130935	0.000578756	0.181002
FAM231D	0.846596	0.79865	6.1171	0.00013124	0.000579915	0.951776
CACNA1C	0.580965	4.24956	6.11544	0.00013152	0.00058078	0.304805
FAM120C	0.636347	3.43787	6.11499	0.000131595	0.000580927	0.459627
CYFIP2	0.750777	1.79341	6.11356	0.000131836	0.000581806	0.776293
CYB561D1	0.34341	3.73222	6.11143	0.000132197	0.000583198	0.394557
PSAT1	0.254615	6.58224	6.1112	0.000132236	0.000583198	0.0608258
ACSF2	0.487445	4.46237	6.11066	0.000132327	0.000583412	0.263868
SAE1	0.275411	8.51599	6.11028	0.000132391	0.00058351	-0.0148107
GNE	0.419801	4.34044	6.10959	0.000132508	0.000583839	0.281664
PLEKHH2	0.91092	3.21695	6.10452	0.000133373	0.000587249	0.490992
ICE2	0.606833	5.27857	6.10443	0.000133389	0.000587249	0.154802
MARK4	0.41786	5.21511	6.10431	0.00013341	0.000587249	0.160936
ZNF430	0.520992	3.33709	6.10068	0.000134032	0.000589237	0.460875
CEBPD	0.601621	2.38603	6.09889	0.00013434	0.000590088	0.647132
GADD45A	0.382238	5.01717	6.09594	0.00013485	0.000591702	0.170213
NKPD1	1.74411	-1.81015	6.09488	0.000135033	0.000592319	1.27973
MPP7	1.77599	-0.654745	6.0911	0.000135692	0.000595019	1.13808
CAMLG	0.308648	5.51916	6.08611	0.000136564	0.000597514	0.106312
TIGD7	1.72173	0.871974	6.08418	0.000136903	0.000598809	0.894446
RNF11	0.420086	7.10226	6.08391	0.000136951	0.000598829	-0.00446989
ARHGAP1	0.407925	6.18035	6.07821	0.000137957	0.000602277	0.0396663
ZNF518B	0.46856	4.24381	6.07252	0.000138972	0.000606132	0.246485
AP5Z1	0.523234	5.85463	6.07195	0.000139074	0.000606386	0.056499
WDR77	0.315285	5.83436	6.07091	0.00013926	0.000606813	0.0568279
GALT	1.02288	2.33026	6.06176	0.000140911	0.000613234	0.606675
GRIPAP1	0.276401	5.66209	6.05359	0.000142404	0.000618949	0.0480676
THAP10	0.516677	2.71256	6.05212	0.000142673	0.000619925	0.51952
ZNF826P	1.44017	-0.131404	6.03918	0.000145075	0.000629768	0.994143
ARHGAP8	0.513651	6.14396	6.03735	0.00014542	0.000631066	-0.0144971
SKA1	0.375878	5.78673	6.03549	0.00014577	0.000632385	0.0117827
FAM21A	0.354631	5.97511	6.03524	0.000145816	0.000632387	-0.00448671
TAZ	0.676878	3.58315	6.02805	0.000147177	0.000637692	0.3094
TMEM136	0.703376	2.5306	6.02332	0.000148081	0.000640804	0.515039
PSRC1	0.39608	5.35939	6.01183	0.0001503	0.000648928	0.018314
STAMBPL1	0.778826	2.26824	6.01165	0.000150334	0.000648928	0.549197
WBP1L	0.279705	6.08781	6.00897	0.000150857	0.000650777	-0.0499909
AP3S1	0.302323	6.40364	6.00618	0.000151405	0.000652529	-0.0748147
METTL7B	1.20708	0.351026	6.00419	0.000151795	0.000653385	0.871653
CDHR1	3.57592	-0.798643	6.00391	0.000151849	0.000653385	1.03916
KIAA1841	0.403211	4.441	6.0038	0.000151873	0.000653385	0.119032
NRG3	4.02867	-2.19069	6.00372	0.000151887	0.000653385	1.19634
CPSF1P1	4.37034	-2.74963	5.9984	0.000152938	0.000657497	1.23907
SNX1	0.253653	7.4449	5.99607	0.000153402	0.00065867	-0.142487
P2RX7	0.533339	3.33173	5.99434	0.000153746	0.000659736	0.314689
PTPMT1	0.452617	5.12697	5.99363	0.000153887	0.000659932	0.0163673
PITHD1	0.357257	5.83566	5.99078	0.000154458	0.000661971	-0.0548175
RP9P	0.422228	3.66018	5.98894	0.000154828	0.000663146	0.239217
LIN7C	0.476871	3.99712	5.98797	0.000155022	0.000663565	0.172322
PAFAH1B2	0.273257	6.72303	5.98695	0.000155228	0.00066424	-0.119511
INTS7	0.395356	4.97171	5.98517	0.000155588	0.000665365	0.021397
CDC42SE1	0.267131	7.2656	5.98325	0.000155976	0.000666662	-0.152534
PER1	0.405248	4.75988	5.97656	0.000157339	0.00067223	0.0351037
CYB5R1	0.437943	6.07086	5.97133	0.000158411	0.000676185	-0.101314
NEDD4	0.738002	4.58151	5.96775	0.000159151	0.000678712	0.0474908
DEPDC1B	0.586831	3.83175	5.96053	0.000160653	0.000684063	0.165386
ANKLE2	0.284187	6.76919	5.9603	0.000160702	0.000684063	-0.159308
PPIB	0.496018	9.33559	5.95744	0.000161302	0.000686193	-0.245447
PCYT1B	0.598381	2.1614	5.94628	0.000163664	0.000694527	0.478468
BTG1	0.272069	6.45448	5.94598	0.000163728	0.000694587	-0.162023
USP11	0.366463	6.11521	5.94561	0.000163808	0.000694711	-0.140654
KDM2B	0.270884	5.85302	5.94497	0.000163945	0.000695079	-0.120487
TMEM38A	0.721443	2.1666	5.93946	0.000165127	0.000699448	0.46798
IDH3A	0.248573	7.02108	5.93826	0.000165385	0.000700328	-0.203496
PYGO2	0.323266	6.01185	5.93682	0.000165698	0.00070122	-0.145059
KCNMB4	1.39166	-0.410879	5.93477	0.00016614	0.000702877	0.891933
DNAJC24	0.605	3.55566	5.93395	0.000166319	0.000703419	0.183836
NEK11	1.15567	0.522422	5.93254	0.000166625	0.000704329	0.744904
RFC2	0.39115	6.90593	5.93249	0.000166636	0.000704329	-0.205602
PTPN6	1.19715	-0.4889	5.93156	0.000166839	0.000704969	0.898514
VPS37A	0.304146	5.40139	5.93074	0.000167017	0.000705291	-0.099218
DGKZ	0.384197	6.42034	5.92861	0.000167484	0.000707009	-0.184457
NTNG1	3.45162	-2.73714	5.92818	0.000167578	0.000707009	1.14476
CXorf40A	0.401366	3.68673	5.92788	0.000167642	0.000707067	0.148523
NBPF3	0.63465	3.44002	5.92669	0.000167903	0.000707519	0.197606
MYO5C	0.887042	-0.377765	5.92435	0.000168417	0.000709251	0.872904
ESRP1	0.478776	3.4784	5.91537	0.000170407	0.000716538	0.173756
USH2A	1.38414	0.136577	5.91504	0.000170481	0.000716632	0.783001
BCL7A	0.270481	5.78715	5.91433	0.000170638	0.000716856	-0.157798
CTH	0.374167	4.99858	5.91343	0.000170841	0.00071749	-0.0822701
GPR161	0.506212	6.39944	5.91271	0.000171002	0.000717947	-0.20559
CYP2E1	2.04237	-0.573754	5.91059	0.000171477	0.000719506	0.881499
DIRC2	0.335495	5.22323	5.90681	0.000172326	0.000722849	-0.115346
ZNF283	0.783195	2.30859	5.90453	0.000172842	0.000724354	0.392342
DONSON	0.343415	6.25286	5.90362	0.000173049	0.000724782	-0.209318
STK32A	0.493703	3.85514	5.90324	0.000173135	0.000724862	0.0805524
FBXO21	0.453662	5.06369	5.90084	0.000173679	0.000726757	-0.107107
HIST1H2BC	1.08582	0.847454	5.89983	0.000173909	0.000727187	0.644531
ZFYVE19	0.522534	5.06412	5.8997	0.000173939	0.000727187	-0.108764
TXNDC15	0.302841	5.60858	5.8991	0.000174076	0.000727539	-0.163182
FBXL17	0.786592	4.16265	5.89396	0.000175252	0.000732231	0.0108855
BHLHE41	0.353437	7.03697	5.89047	0.000176057	0.000735373	-0.27162
ZIC1	0.946431	1.15045	5.88789	0.000176653	0.000737416	0.575635
POLE4	0.566896	5.46635	5.88577	0.000177145	0.000739023	-0.168704
THYN1	0.498949	4.70991	5.87857	0.000178828	0.000745233	-0.0960451
ZNF137P	1.30549	-0.558716	5.87129	0.000180545	0.000751164	0.825324
USP51	0.51758	3.70803	5.86723	0.000181512	0.000754505	0.0589243
CNFN	0.760476	0.160156	5.86505	0.000182033	0.000756443	0.710033
PUS3	0.391727	3.64959	5.8637	0.000182357	0.000757564	0.0656853
ZSCAN5A	0.717721	1.64041	5.86242	0.000182664	0.000758257	0.455309
IDS	0.487716	6.39779	5.86005	0.000183235	0.000760296	-0.279838
TAF9	0.275016	6.85421	5.85793	0.000183747	0.000762191	-0.308051
ABCD1	0.450821	7.66324	5.8577	0.000183802	0.000762191	-0.345363
GSTO2	0.371065	3.46497	5.85339	0.000184848	0.000766075	0.0892743
SHROOM4	0.687583	1.86197	5.85338	0.00018485	0.000766075	0.403294
ZNF730	3.4121	-2.98115	5.85031	0.000185599	0.000768951	1.06066
TTC39A	0.341357	8.34878	5.84917	0.000185878	0.000769874	-0.37636
TMEM178B	1.32398	-0.630962	5.8425	0.000187517	0.000775502	0.795531
RNF103	0.49199	4.25083	5.8422	0.000187593	0.000775581	-0.0771483
PDE5A	0.825725	2.56152	5.83956	0.000188247	0.000777357	0.252172
ZNF737	1.49146	-0.947567	5.83876	0.000188446	0.000777945	0.832541
TOMM40L	0.395274	4.76249	5.83547	0.000189265	0.000780859	-0.163864
NARS2	0.282297	5.71447	5.83194	0.000190149	0.000784059	-0.26783
FOSB	0.82879	0.64354	5.82641	0.000191541	0.000788837	0.576905
SIAE	0.391145	4.56467	5.82331	0.000192327	0.000791599	-0.153569
SETD6	0.408452	4.73659	5.82115	0.000192876	0.000793626	-0.1808
SLC1A3	0.502368	4.16465	5.81945	0.000193309	0.000794931	-0.0947849
PRICKLE2	0.81538	2.81483	5.81445	0.000194592	0.000799246	0.167093
STK17A	0.336382	6.31973	5.81423	0.000194647	0.000799246	-0.340034
LRP10	0.339195	6.85006	5.8095	0.000195868	0.000803779	-0.376547
FAM120AOS	0.316193	4.2591	5.80664	0.000196611	0.00080635	-0.128977
TOP3A	0.260394	6.13084	5.80034	0.000198258	0.00081118	-0.347105
FITM2	0.339305	5.0158	5.79817	0.000198828	0.000813031	-0.247286
CTBS	0.37124	4.52274	5.79676	0.000199198	0.000814302	-0.185122
CCDC50	0.343318	6.43153	5.79564	0.000199494	0.000815271	-0.373276
TRAPPC4	0.521403	5.30206	5.79525	0.000199597	0.000815448	-0.281127
2007-09-01	0.30363	7.77126	5.7948	0.000199718	0.000815703	-0.438233
TCAIM	0.338125	4.64876	5.79381	0.000199978	0.00081628	-0.207747
SEC11C	0.437274	7.6075	5.79075	0.00020079	0.000818871	-0.438496
SAR1B	0.267126	6.15355	5.79051	0.000200857	0.0008189	-0.362715
CCDC66	0.437098	3.23896	5.78479	0.000202384	0.000824155	0.0391952
ACP6	0.660107	3.64507	5.78013	0.000203638	0.00082877	-0.0518097
HEXIM1	0.244235	7.00495	5.77991	0.000203697	0.00082877	-0.426848
BMP2	1.10746	-1.59094	5.77915	0.000203902	0.000829359	0.828705
RNF26	0.344134	6.37166	5.76835	0.000206847	0.0008395	-0.408603
NCR3LG1	0.860343	2.58043	5.76823	0.000206882	0.0008395	0.147525
WDR82	0.399574	7.41346	5.76601	0.00020749	0.000841476	-0.466193
ZNF552	0.692429	2.16062	5.75947	0.000209303	0.000847829	0.215851
FAM69A	0.284214	5.00796	5.75907	0.000209415	0.000847853	-0.302156
PTPRS	0.353294	7.17664	5.75561	0.000210381	0.000851449	-0.470241
FRG1BP	0.788893	0.505352	5.74752	0.000212658	0.000858901	0.489387
CDH7	1.43701	-0.8442	5.74648	0.000212951	0.000859582	0.691062
GAGE12H	3.57035	-2.44743	5.74556	0.000213211	0.00086038	0.872277
RAB13	0.342022	6.542	5.7435	0.000213797	0.000862242	-0.45401
ZNF17	0.662059	1.65558	5.74035	0.000214698	0.000864865	0.280429
DNTTIP2	0.324494	7.14964	5.73953	0.000214932	0.000865556	-0.491942
RP11-15H20.8	2.73228	-0.653031	5.73323	0.000216742	0.000872083	0.646637
ZC2HC1A	0.60194	4.14781	5.7329	0.000216839	0.000872218	-0.215154
C2orf88	1.77278	-1.9251	5.72379	0.000219489	0.000882107	0.789457
MAPK1IP1L	0.242255	6.73559	5.7224	0.000219897	0.000883232	-0.494864
ZNF567	0.651122	2.23097	5.72148	0.000220166	0.000884057	0.148533
C7orf26	0.475428	5.20943	5.71803	0.000221184	0.000887884	-0.382239
ITPKA	1.57462	-0.464827	5.70727	0.000224385	0.000899691	0.583765
EMD	0.529856	5.91986	5.70701	0.000224462	0.000899717	-0.464006
EIF3M	0.258414	7.35786	5.7065	0.000224616	0.000899831	-0.549055
RGL1	0.518429	4.31033	5.70131	0.00022618	0.000905667	-0.287988
MBNL3	0.691486	3.55962	5.69858	0.000227009	0.000908629	-0.150636
SLC11A2	0.385879	6.64777	5.69621	0.000227728	0.000911242	-0.527716
SIKE1	0.476834	5.48546	5.69578	0.00022786	0.000911505	-0.441121
TRAF3	0.360969	5.26722	5.69285	0.000228757	0.000914298	-0.424167
RP1-27O5.3	2.74065	-0.0551687	5.69129	0.000229234	0.00091594	0.500318
TRABD2A	0.439688	3.31162	5.67408	0.000234582	0.000935183	-0.13408
ZCCHC8	0.561493	4.96673	5.67405	0.000234591	0.000935183	-0.419362
PGAM5	0.302787	6.32695	5.67195	0.000235254	0.000937283	-0.544143
ZNF586	0.682017	2.19583	5.66931	0.000236087	0.000940035	0.0806577
RP1-34B20.21	1.52456	0.15086	5.66316	0.000238045	0.000945946	0.428177
JAK1	0.672528	7.52939	5.66181	0.000238477	0.000946716	-0.62048
RPP14	0.328026	4.95042	5.65659	0.000240155	0.0009522	-0.442632
GTF2A2	0.403328	6.2799	5.6435	0.000244419	0.000967658	-0.582287
IRX5	0.47784	4.03519	5.64178	0.000244985	0.000969342	-0.32582
ARHGAP17	0.258032	5.58958	5.63864	0.000246021	0.000972051	-0.533221
LMTK3	1.90044	-1.20286	5.6351	0.000247197	0.000975874	0.581673
ZNF251	0.473386	2.94302	5.63402	0.000247557	0.000976767	-0.116009
MCOLN1	0.502776	6.1963	5.63399	0.000247568	0.000976767	-0.590443
FAM122B	0.595191	4.84349	5.6312	0.000248497	0.000980152	-0.466696
SPTA1	1.95443	-2.18476	5.63039	0.000248769	0.000980664	0.687554
TPBG	0.584072	2.28374	5.62844	0.000249425	0.000982408	0.00525599
MINPP1	0.319155	5.48319	5.62559	0.000250384	0.000985624	-0.542131
SFMBT1	0.562905	4.37531	5.62131	0.000251834	0.000989639	-0.413744
PXMP2	0.51438	3.61565	5.62043	0.000252132	0.000990247	-0.274753
SRGAP2C	0.385956	5.46444	5.61569	0.000253751	0.000995755	-0.554686
ZNF367	0.60503	4.80866	5.61431	0.000254223	0.00099704	-0.486741
UNC13B	0.378484	5.21179	5.60785	0.000256448	0.00100434	-0.541313
BLK	1.33429	-1.38548	5.60437	0.000257658	0.00100803	0.561127
TONSL	0.428397	6.39873	5.6043	0.000257682	0.00100803	-0.646357
ARHGEF12	0.891522	6.78424	5.60261	0.000258271	0.00101005	-0.670286
PAX6	1.23268	-0.0445659	5.60194	0.000258504	0.00101067	0.372
TRAM1L1	1.25288	-0.162495	5.60126	0.000258742	0.00101083	0.389187
MST1	0.730786	1.13366	5.6012	0.000258764	0.00101083	0.172837
ALG1	0.337683	4.84426	5.60065	0.000258956	0.0010113	-0.51103
ZNHIT6	0.40787	5.62012	5.60018	0.000259119	0.00101165	-0.591705
PLEKHA7	1.03861	0.684288	5.59953	0.000259349	0.00101225	0.248762
ZNF611	0.871576	2.65316	5.59921	0.000259461	0.00101225	-0.108775
ZNF417	1.15501	1.79413	5.59725	0.000260148	0.00101452	0.0511743
MRPL37	0.400464	8.54333	5.59481	0.000261009	0.0010173	-0.745897
SLC25A24P1	2.30749	-2.33834	5.59183	0.000262062	0.00102061	0.649608
FAM219B	0.329276	5.27814	5.59056	0.000262511	0.00102171	-0.57301
ZNF792	0.929147	1.55775	5.58669	0.000263892	0.00102622	0.0779746
PSEN2	0.309289	7.48512	5.5839	0.000264887	0.00102951	-0.731611
PDE12	0.419081	5.76506	5.58198	0.00026558	0.00103162	-0.631271
PLCB4	0.526159	3.647	5.57147	0.000269387	0.00104465	-0.352085
CYSTM1	0.403633	6.04712	5.56827	0.000270559	0.00104861	-0.674897
TMEM110-MUSTN1	0.919836	2.03263	5.56727	0.000270924	0.00104972	-0.0355865
TCERG1L	1.58847	-1.13554	5.56291	0.00027253	0.00105536	0.471307
ALX3	0.630793	2.5782	5.56226	0.000272772	0.0010557	-0.147524
TRIM21	0.470215	3.04422	5.56047	0.000273435	0.00105767	-0.242815
CNTNAP2	1.07661	-1.65076	5.55859	0.000274133	0.00105949	0.528365
IL17RB	0.887375	1.13627	5.55733	0.000274602	0.001061	0.109288
GPSM2	0.401736	6.20423	5.55625	0.000275008	0.00106227	-0.703857
HPS5	0.330584	6.88737	5.55339	0.000276074	0.00106523	-0.747345
HIST1H2BD	0.545827	2.78336	5.55338	0.000276081	0.00106523	-0.200811
CICP14	0.826661	2.1305	5.54884	0.000277787	0.00107079	-0.0805409
FRRS1	0.839815	1.84229	5.54662	0.000278627	0.00107265	-0.0306188
FLT3LG	0.835722	0.375603	5.54351	0.000279806	0.00107659	0.22074
GUSB	0.307287	7.28778	5.54229	0.00028027	0.00107748	-0.783724
PSMD13	0.360385	7.63973	5.54121	0.000280683	0.00107876	-0.799601
MAD2L1BP	0.331448	6.28914	5.53988	0.000281191	0.00107948	-0.733334
NUPL2	0.30821	5.01832	5.53985	0.000281202	0.00107948	-0.619701
NMNAT3	1.59004	-1.20884	5.53962	0.000281291	0.00107948	0.44767
KIAA1191	0.223257	7.73453	5.53952	0.00028133	0.00107948	-0.805222
EVI5	0.500692	5.10685	5.5395	0.000281338	0.00107948	-0.629719
ZNF114	0.826792	0.645259	5.53666	0.000282425	0.0010827	0.1652
FRG1CP	0.555999	2.39094	5.53649	0.000282491	0.0010827	-0.148306
RP11-89K11.1	0.765376	0.456037	5.53546	0.000282888	0.00108392	0.19569
EP400NL	0.402585	3.57628	5.53329	0.000283722	0.00108681	-0.392985
CPNE5	0.955702	-1.09011	5.53205	0.000284202	0.00108835	0.421648
GLB1L3	1.38141	-0.557703	5.5254	0.000286787	0.00109734	0.339424
ZNF117	1.02336	-0.0294805	5.52298	0.000287735	0.00110066	0.25673
PLA2G4C	0.776942	0.391232	5.52103	0.000288498	0.00110327	0.185798
FAM63B	0.755817	6.18703	5.51868	0.000289426	0.00110621	-0.757472
TMEM167A	0.362951	7.40853	5.51829	0.000289579	0.00110649	-0.824102
FAF1	0.249081	7.13044	5.51788	0.000289741	0.0011068	-0.811811
ZNF718	1.40738	-0.247305	5.51702	0.000290081	0.00110779	0.281721
NOD1	0.364084	3.56405	5.51564	0.000290628	0.00110927	-0.416169
SACM1L	0.420868	6.14856	5.50935	0.000293132	0.0011179	-0.768387
CMTM6	0.403093	6.82848	5.50697	0.000294082	0.00112121	-0.81203
ZNF26	0.589344	3.20781	5.50145	0.000296308	0.00112939	-0.36242
HELLS	0.361909	5.12838	5.50076	0.000296589	0.00112983	-0.688616
UBR7	0.269968	6.09293	5.50053	0.000296681	0.00112988	-0.777302
SCML2	0.773685	2.62586	5.49991	0.000296931	0.00113034	-0.247505
MAN1A1	0.923309	2.67595	5.49098	0.000300574	0.00114171	-0.270372
ZNF689	0.304414	4.81213	5.4908	0.000300651	0.00114171	-0.667086
ORAI1	0.414495	5.42948	5.49054	0.000300757	0.00114171	-0.733708
STK38	0.343216	5.07022	5.48745	0.000302029	0.00114614	-0.701944
ARMCX4	1.18272	0.118969	5.48662	0.000302371	0.00114712	0.180842
MRAP2	1.0864	0.299815	5.48563	0.000302784	0.00114837	0.149912
CEP128	0.64464	4.27824	5.48437	0.000303305	0.00115003	-0.597216
IKZF2	1.96919	-0.836681	5.47782	0.000306034	0.00115847	0.310429
TCHP	0.36129	5.80017	5.47368	0.000307772	0.00116441	-0.792528
SLC25A46	0.44088	6.87171	5.47283	0.000308134	0.00116546	-0.864406
SRPRB	0.250763	6.34255	5.47221	0.000308392	0.00116612	-0.835704
RRAGC	0.217491	6.80796	5.46798	0.000310185	0.00117193	-0.868133
LTBP1	1.05992	1.23798	5.46165	0.000312889	0.00118096	-0.0471218
ETV1	0.614468	6.19001	5.46159	0.000312916	0.00118096	-0.841395
SH3RF3	0.506777	3.46569	5.457	0.000314889	0.00118765	-0.481469
MCFD2	0.280827	7.1202	5.45683	0.000314964	0.00118765	-0.900857
ETS1	0.682196	7.78694	5.45447	0.000315985	0.00119091	-0.931576
TCF15	1.0244	0.378132	5.45169	0.000317193	0.00119482	0.0877718
TRO	0.377571	4.56387	5.44866	0.000318514	0.00119878	-0.694695
L1CAM	0.25317	8.18332	5.44848	0.000318592	0.00119878	-0.951261
LDB3	0.936918	0.421043	5.44748	0.00031903	0.0012001	0.0744664
OMG	2.41382	-2.23314	5.44356	0.000320752	0.00120592	0.430656
ZNF629	0.367313	4.1725	5.44087	0.000321939	0.00120972	-0.643103
ZNF275	0.921751	3.8159	5.43367	0.000325142	0.00122076	-0.587462
CERS1	0.596686	5.83997	5.43284	0.000325512	0.00122182	-0.856104
BTN3A3	0.717474	1.28508	5.42681	0.000328222	0.00123022	-0.10615
STK17B	0.328245	5.71522	5.42667	0.000328283	0.00123022	-0.854193
MBD6	0.293506	6.03308	5.42276	0.000330055	0.00123585	-0.886997
NAGK	0.477192	6.59067	5.42253	0.000330163	0.00123592	-0.923296
FAM65A	0.308805	7.61094	5.4208	0.00033095	0.00123786	-0.975331
IKZF4	0.411387	3.46148	5.41976	0.000331424	0.0012393	-0.535319
CNTLN	0.618093	3.27578	5.41782	0.000332307	0.00124226	-0.499201
DSEL	1.09316	0.124134	5.41578	0.000333244	0.00124509	0.0774603
ADNP2	0.411346	5.44363	5.41331	0.000334377	0.00124831	-0.848651
DEPDC7	1.06903	0.653784	5.41289	0.000334574	0.00124871	-0.0156458
KCNG2	1.98644	-1.96091	5.40914	0.000336308	0.00125484	0.352073
RBSN	0.407144	5.22216	5.40869	0.000336514	0.00125527	-0.833739
POLB	0.295111	5.31129	5.4051	0.000338184	0.00126048	-0.847933
IGFBP5	2.05518	-0.878677	5.40404	0.00033868	0.0012617	0.210115
TMEM42	0.520698	2.64997	5.40325	0.000339048	0.00126234	-0.393819
RPS2P32	0.838774	2.18271	5.40245	0.000339423	0.00126339	-0.30402
MIPOL1	0.695644	2.44226	5.40063	0.000340273	0.00126553	-0.356832
ATP9A	0.617412	3.12622	5.39914	0.000340975	0.00126717	-0.49559
GABARAPL1	0.306503	5.78885	5.39892	0.000341081	0.00126717	-0.901702
AADAT	0.448593	2.95071	5.39764	0.00034168	0.00126893	-0.461952
SSU72	0.392888	8.06856	5.39752	0.000341737	0.00126893	-1.02352
SPCS3	0.384462	7.31458	5.39676	0.000342097	0.00126951	-0.998803
SLC1A4	0.203401	9.16763	5.39455	0.000343144	0.00127235	-1.05327
SLC16A7	1.17829	-0.430475	5.3944	0.000343211	0.00127235	0.132339
PPP1R13B	0.430488	3.37123	5.39417	0.00034332	0.00127241	-0.554037
CSRNP2	0.334806	4.84693	5.39275	0.000343994	0.0012745	-0.815776
MIOS	0.365504	4.52794	5.38907	0.000345746	0.00128037	-0.777276
KCNJ14	0.608457	1.497	5.38431	0.000348029	0.00128814	-0.205611
KNTC1	0.627602	6.08452	5.37365	0.000353194	0.00130585	-0.963621
SLC15A4	0.259285	6.24863	5.37309	0.000353468	0.00130652	-0.976066
ADGRL1	0.318203	5.43919	5.37014	0.000354914	0.00131116	-0.912095
TFDP2	0.302239	4.79846	5.36635	0.00035678	0.00131669	-0.8487
SLC7A6	0.413794	5.58011	5.36598	0.000356965	0.00131698	-0.931567
LRP3	1.11429	0.200019	5.36493	0.000357485	0.00131854	-0.00896557
STEAP1	0.503154	2.16664	5.36455	0.000357672	0.00131888	-0.35675
TRIB3	0.33531	6.26906	5.36097	0.000359448	0.00132401	-0.995372
SLC35A1	0.292531	4.44956	5.36002	0.000359924	0.00132541	-0.808207
PTPRD	1.64537	-1.22013	5.35795	0.000360955	0.00132815	0.189075
ZNF420	0.672181	2.15543	5.3571	0.000361381	0.00132936	-0.365609
CNKSR3	0.419944	3.46212	5.35599	0.00036194	0.00133047	-0.629615
TRIM44	0.52556	6.92696	5.35593	0.000361971	0.00133047	-1.04
FANCD2	0.285675	5.39048	5.35396	0.000362959	0.00133375	-0.931456
ZNF221	0.853861	-0.139492	5.34748	0.000366235	0.00134504	0.0198639
ZNF33A	0.559119	3.97106	5.33523	0.000372514	0.00136522	-0.762853
EPM2AIP1	0.606274	3.78474	5.32739	0.000376594	0.0013765	-0.738443
PTPN9	0.213999	7.12097	5.32721	0.000376685	0.0013765	-1.09274
FAM171B	0.572282	1.76969	5.31825	0.000381412	0.00139215	-0.351653
SPX	1.56475	-1.07909	5.31641	0.000382386	0.00139474	0.110355
FERMT2	0.451059	6.6299	5.31461	0.000383346	0.00139788	-1.08552
2006-09-01	0.307682	5.01141	5.30952	0.000386074	0.00140694	-0.958555
HIST2H2AC	0.631723	1.72882	5.30604	0.000387949	0.00141317	-0.362348
MDGA1	0.35723	3.62608	5.30575	0.000388104	0.00141336	-0.738412
ATP5L	0.44003	7.28357	5.30224	0.000390005	0.00141991	-1.13784
TMEM74	0.842563	0.512777	5.30056	0.000390923	0.0014225	-0.155921
ZNF496	0.271807	4.57475	5.3002	0.000391115	0.00142282	-0.916135
ZDHHC6	0.250991	5.84744	5.28779	0.000397943	0.00144538	-1.07201
ARPP19	0.434569	7.67825	5.28708	0.00039834	0.00144644	-1.17633
PQLC2	0.460565	5.79712	5.28646	0.000398682	0.0014473	-1.06958
MFN2	0.255197	8.23747	5.28314	0.000400534	0.00145327	-1.19796
DYRK3	0.486458	4.32614	5.28191	0.000401225	0.00145539	-0.904696
PDIA6	0.215008	9.26443	5.28108	0.00040169	0.00145669	-1.22413
OSGEP	0.308716	4.50279	5.27935	0.000402661	0.00145908	-0.936569
KDELR2	0.202546	7.77718	5.27043	0.000407713	0.00147466	-1.20445
PRKAR2A	0.521274	6.61068	5.26541	0.000410581	0.00148348	-1.15797
HIBADH	0.233391	6.06384	5.26502	0.000410806	0.00148385	-1.12388
TMEM51	0.279854	6.41681	5.2648	0.000410936	0.00148385	-1.14786
CRYZ	0.249751	5.95449	5.26316	0.000411879	0.00148662	-1.11787
CCDC97	0.33721	5.02134	5.26191	0.0004126	0.00148883	-1.03077
INTU	0.661136	3.05343	5.26095	0.000413155	0.00149044	-0.685604
CNPPD1	0.383917	6.04758	5.25972	0.000413863	0.00149222	-1.13055
PCDHA11	3.86204	-2.16676	5.25411	0.000417129	0.00150243	0.152538
HIST1H2AM	1.2694	0.497497	5.25245	0.000418098	0.00150538	-0.224305
UROD	0.382648	7.44081	5.25215	0.000418275	0.00150538	-1.21968
CASP4	0.531008	3.00055	5.25176	0.000418505	0.00150572	-0.688519
ATP10A	0.266577	6.37186	5.25161	0.000418588	0.00150572	-1.1649
AP4E1	0.714903	4.54584	5.24186	0.00042435	0.00152367	-0.999132
EIF4A3	0.309367	7.43288	5.2415	0.000424564	0.00152404	-1.23533
EDEM3	0.877893	5.76541	5.23972	0.000425622	0.00152744	-1.13679
NUDCD3	0.256852	6.97593	5.23609	0.000427799	0.00153448	-1.22154
MICU1	0.22474	5.97701	5.23607	0.000427807	0.00153448	-1.16031
SLC2A13	0.664755	3.79037	5.23201	0.00043025	0.00154285	-0.881911
GPAM	0.652134	5.20945	5.22944	0.000431805	0.00154722	-1.0994
NIN	0.878703	7.28918	5.22713	0.000433209	0.00155184	-1.2506
SMAD2	0.243978	7.12535	5.22319	0.000435613	0.00156005	-1.24861
MOCS2	0.232276	6.15409	5.22277	0.00043587	0.00156057	-1.19388
FABP3	0.762123	0.668285	5.22209	0.000436291	0.00156167	-0.298958
SCML1	0.376123	4.5838	5.22166	0.000436554	0.00156221	-1.03503
ZNF366	0.706227	1.08302	5.21965	0.000437786	0.00156621	-0.376049
XPOT	0.396862	7.48055	5.20934	0.00044418	0.00158744	-1.28564
GABBR2	1.35722	-1.50338	5.20467	0.000447104	0.00159706	0.00236729
RCL1	0.336691	3.72427	5.20424	0.000447377	0.00159721	-0.910225
ZNF654	0.575135	4.43969	5.20399	0.000447532	0.00159736	-1.03966
C2orf69	0.5476	5.7755	5.20113	0.000449337	0.00160263	-1.19569
YKT6	0.266115	7.44855	5.2011	0.000449358	0.00160263	-1.29674
TACC1	0.607688	7.74553	5.20091	0.000449477	0.00160264	-1.30784
R3HCC1	0.387598	4.92411	5.20073	0.000449594	0.00160264	-1.11143
SLC37A4	0.38571	5.69153	5.19944	0.000450411	0.00160514	-1.19073
ARPC3	0.287911	7.13223	5.19294	0.000454553	0.001618	-1.2945
ANAPC2	0.482645	5.41586	5.19286	0.000454604	0.001618	-1.17485
PATJ	0.547508	2.84582	5.19122	0.000455656	0.00162132	-0.747954
TRPC4AP	0.295109	6.79156	5.19011	0.000456371	0.00162345	-1.28094
ESR1	0.907172	0.904738	5.18822	0.000457585	0.00162693	-0.39116
TAX1BP1	0.367444	7.27868	5.18725	0.000458211	0.00162874	-1.31017
BSCL2	1.00106	5.29463	5.18357	0.000460595	0.0016353	-1.17696
LRRC57	0.316057	4.94874	5.18349	0.000460649	0.0016353	-1.14027
ARHGAP28	0.479551	2.21899	5.18294	0.000461008	0.00163615	-0.636917
EIF2S2	0.250963	8.16424	5.18089	0.000462343	0.00164005	-1.34978
SLC6A4	0.968789	0.85529	5.17762	0.000464479	0.00164678	-0.39821
SPCS1	0.334274	6.61819	5.17599	0.000465546	0.00164971	-1.29284
APBB1	0.3799	6.48918	5.17543	0.000465918	0.00165061	-1.28642
HRNR	1.12895	-0.0710121	5.1736	0.000467119	0.00165444	-0.246943
PDCD7	0.266888	6.20176	5.16995	0.000469539	0.00166216	-1.27688
EHMT1	0.236346	5.87339	5.16896	0.000470191	0.00166362	-1.25278
GDAP2	0.360928	4.39642	5.16737	0.000471249	0.0016665	-1.08794
SEMA4C	0.193872	8.12098	5.16659	0.000471771	0.00166792	-1.37027
EPB41L2	0.502154	6.64627	5.16607	0.000472116	0.00166871	-1.30936
PLAG1	0.872401	2.21376	5.16343	0.000473878	0.00167409	-0.665201
CCAR2	0.222956	7.25692	5.15473	0.000479745	0.00169351	-1.35827
PSMD6	0.227051	7.00166	5.15347	0.000480599	0.00169566	-1.34741
CDC37L1	0.400825	3.19597	5.14663	0.000485274	0.00171041	-0.886723
NOTCH2NL	0.428631	3.9299	5.14547	0.000486071	0.00171278	-1.03934
HYLS1	0.409721	4.08013	5.14224	0.000488299	0.00171975	-1.07207
PHC2	0.289683	8.71358	5.13295	0.00049477	0.00174033	-1.4353
RPA3	0.369477	4.98285	5.13026	0.000496663	0.00174654	-1.22469
ETFA	0.245387	7.45992	5.12766	0.000498495	0.00175254	-1.40823
SLC22A18AS	0.505092	4.83602	5.12693	0.000499015	0.00175392	-1.2124
RHOG	0.413643	5.52877	5.12301	0.000501795	0.00176234	-1.29119
AURKC	1.20195	-1.48972	5.11968	0.000504171	0.00176979	-0.124216
SIRT2	0.412693	5.95196	5.11778	0.000505533	0.00177412	-1.33683
RHEBL1	0.45767	3.1113	5.11445	0.000507935	0.00178164	-0.917755
HERC2P9	0.356624	3.62378	5.10542	0.000514494	0.00180327	-1.03892
ZNF418	3.68429	-1.95456	5.10491	0.00051486	0.0018041	-0.0891419
FAM136A	0.293336	6.02417	5.1025	0.000516629	0.00180938	-1.36591
MPHOSPH9	0.604875	5.23124	5.10065	0.000517989	0.0018123	-1.29615
ZNF876P	1.54734	-1.40148	5.09715	0.000520579	0.00182045	-0.168827
SNX25	0.287161	4.8067	5.09426	0.000522719	0.001827	-1.25823
DVL3	0.224733	7.3017	5.09059	0.000525458	0.00183518	-1.45769
ITK	0.826597	0.718568	5.08827	0.000527203	0.00183988	-0.507849
PRKD3	0.510047	7.38941	5.08719	0.000528009	0.00184177	-1.46671
PTPN23	0.239542	7.13392	5.08617	0.000528779	0.00184352	-1.45635
MGAM	1.3944	-0.991457	5.07953	0.000533808	0.00185858	-0.249868
RASEF	0.98266	4.4985	5.0794	0.000533905	0.00185858	-1.23741
EIF3J	0.239339	6.83343	5.07904	0.000534176	0.00185905	-1.45151
CD83	0.256204	6.40955	5.07794	0.000535018	0.00186151	-1.42967
VTI1B	0.213101	6.54972	5.07614	0.00053639	0.00186563	-1.44046
ONECUT1	1.09046	2.42577	5.07598	0.000536512	0.00186563	-0.838508
ARHGAP4	0.640778	3.96231	5.07531	0.000537028	0.00186619	-1.15195
NEK4	0.446137	4.7655	5.0747	0.000537496	0.00186731	-1.28258
MRM2	0.29239	5.90849	5.07307	0.000538745	0.00187071	-1.40125
KRT18	0.385998	4.79088	5.07272	0.000539016	0.00187118	-1.28894
R3HDM1	0.312847	5.21669	5.07141	0.000540022	0.00187373	-1.33918
ATP6V0D1	0.443556	7.84664	5.06934	0.000541621	0.00187833	-1.51043
SPACA6	1.01843	-0.0342675	5.06715	0.000543313	0.00188373	-0.41177
PRPF3	0.244706	5.1513	5.06632	0.000543953	0.001885	-1.34014
CPTP	0.443809	6.46626	5.06225	0.000547127	0.00189458	-1.45689
OBSCN	0.78149	1.44455	5.05958	0.000549214	0.00190085	-0.680454
MAPK6	0.498827	6.69967	5.0578	0.000550613	0.00190474	-1.4767
ZDHHC16	0.343708	5.43512	5.05719	0.000551092	0.0019058	-1.38239
SNX27	0.285196	5.17274	5.05397	0.000553632	0.00191279	-1.36123
HSBP1L1	0.631542	0.660693	5.05337	0.000554111	0.00191396	-0.550211
CASP6	0.457709	3.01753	5.05031	0.000556542	0.00192188	-0.995784
BCAS4	1.04616	-0.537811	5.04836	0.000558089	0.00192603	-0.361699
2002-03-01	1.04279	-0.135838	5.04542	0.00056044	0.00193154	-0.428119
KDM4A	0.281531	6.40702	5.04335	0.000562103	0.0019366	-1.48228
BRAF	0.766209	4.65741	5.04322	0.000562207	0.0019366	-1.31603
GMCL1	0.401533	5.05768	5.04058	0.000564337	0.00194211	-1.36946
WDR6	0.266725	6.18576	5.04054	0.00056437	0.00194211	-1.47236
TADA3	0.389791	6.3006	5.03811	0.000566332	0.00194838	-1.48373
RP11-46I1.2	1.07097	-0.699449	5.03638	0.000567739	0.00195273	-0.355791
PEX6	0.630226	2.73066	5.03595	0.000568092	0.00195346	-0.959803
RSPH9	1.20116	0.285416	5.03398	0.000569694	0.00195785	-0.514526
ATF7IP	0.570735	5.05307	5.03386	0.000569794	0.00195785	-1.37924
ZNF91	1.57578	1.97342	5.03262	0.000570808	0.00196085	-0.817428
CDK13	0.519433	5.62861	5.03132	0.000571869	0.00196333	-1.4401
GGCT	0.237791	6.23093	5.03121	0.000571956	0.00196333	-1.48979
FBN2	1.46337	-1.25825	5.02983	0.000573092	0.00196674	-0.287659
KCNJ12	1.20544	0.15563	5.0189	0.00058214	0.00199284	-0.51551
CCDC154	0.876215	-0.488701	5.01751	0.000583301	0.00199632	-0.415373
RP11-343C2.11	0.382391	5.50403	5.01467	0.000585683	0.00200248	-1.45397
SELK	0.359693	5.95609	5.01071	0.000589021	0.00201191	-1.50045
PSTK	0.592701	2.23684	5.0084	0.000590975	0.00201808	-0.904363
PRR3	0.386593	3.89955	5.00766	0.0005916	0.00201922	-1.24305
WHSC1L1	0.601299	6.19976	5.00392	0.000594789	0.0020286	-1.52942
TMLHE	0.403518	3.15445	5.00242	0.000596071	0.00203226	-1.09715
LAMB4	0.815117	0.346335	4.99783	0.000600019	0.00204341	-0.579526
ZNF112	0.716789	1.7377	4.98903	0.000607655	0.00206483	-0.840373
ZSWIM8	0.275555	6.83631	4.98711	0.000609334	0.00206901	-1.59228
NOTCH3	1.02433	-1.44524	4.98436	0.000611753	0.00207472	-0.330967
PLA2G15	0.341451	6.2324	4.98356	0.000612457	0.00207604	-1.56294
TCF12	0.584535	5.82125	4.97389	0.000621038	0.00210243	-1.54548
ZNF865	0.434298	4.69967	4.97235	0.000622418	0.00210516	-1.43044
MT2A	0.451882	8.43042	4.97187	0.000622849	0.00210529	-1.67479
GPT2	0.229646	5.67417	4.97095	0.000623676	0.00210735	-1.53687
SEC22C	0.269653	6.34535	4.97051	0.000624076	0.00210818	-1.59017
CCDC18	0.571834	4.67057	4.96837	0.000625998	0.00211313	-1.43255
SPRYD4	0.345836	4.81182	4.96803	0.000626311	0.00211367	-1.45187
IFIT3	0.510783	2.46222	4.96449	0.000629509	0.00212342	-1.0156
VASH2	0.621093	1.06006	4.96382	0.00063012	0.00212448	-0.757414
NAT8	0.690005	1.55165	4.96293	0.000630927	0.00212665	-0.846573
ZSCAN29	0.525965	4.98218	4.96198	0.000631798	0.00212854	-1.48155
ZNF845	0.540092	3.024	4.95977	0.000633813	0.00213429	-1.13548
ELOVL5	0.300539	7.35112	4.95935	0.000634192	0.00213505	-1.66078
SLCO3A1	0.35764	3.77544	4.95382	0.00063928	0.00215165	-1.30134
VANGL1	0.428244	5.8675	4.9521	0.000640866	0.00215594	-1.58308
SYDE1	0.27805	6.7175	4.95123	0.000641676	0.00215814	-1.6411
CRMP1	0.712817	3.46528	4.95054	0.000642313	0.00215923	-1.24218
ABHD5	0.318536	4.22145	4.94891	0.000643823	0.00216378	-1.39192
SH3TC2	0.278506	4.9552	4.94487	0.000647593	0.00217486	-1.50474
FOXP1	0.464882	4.00775	4.94137	0.000650874	0.00218482	-1.36543
IL18R1	0.707701	-0.0786678	4.93773	0.000654308	0.00219528	-0.59998
CASP2	0.260878	5.48623	4.93294	0.000658854	0.00220777	-1.57789
GLB1	0.207902	6.65855	4.93015	0.000661526	0.00221519	-1.6704
SIMC1	0.241705	4.56971	4.92988	0.000661781	0.00221551	-1.4771
STRIP2	0.475478	3.49919	4.92901	0.000662612	0.00221775	-1.28242
ATP6V1D	0.237794	6.90279	4.92717	0.000664376	0.00222312	-1.68813
SFMBT2	0.812347	2.2225	4.923	0.000668401	0.00223604	-1.0323
FAM151B	0.616221	0.96269	4.9187	0.000672579	0.00224621	-0.808813
RAD54L2	0.585788	5.62263	4.91699	0.000674246	0.00225015	-1.61528
AVPI1	0.317703	7.49545	4.91182	0.000679312	0.00226487	-1.74022
IFIT5	0.356209	3.72845	4.91057	0.000680548	0.00226778	-1.35839
RAB4A	0.237708	5.40028	4.91044	0.000680678	0.00226778	-1.60443
USP47	0.527294	5.61373	4.90932	0.00068178	0.00227035	-1.62631
NATD1	0.30275	4.3795	4.90858	0.000682512	0.00227224	-1.48046
PEA15	0.26462	8.04235	4.9064	0.00068467	0.00227888	-1.76614
CHRD	1.00447	-0.541257	4.90202	0.00068904	0.00229177	-0.581931
RTKN2	0.517354	3.96418	4.89705	0.000694027	0.00230613	-1.42566
AMFR	0.287024	6.4946	4.89404	0.000697067	0.00231335	-1.71704
ANKRD6	0.481374	4.1597	4.89307	0.000698049	0.00231504	-1.46749
CLPTM1L	0.239306	6.64536	4.88917	0.000702014	0.00232484	-1.73304
MAP7D1	0.317478	8.41517	4.88813	0.000703071	0.00232779	-1.80373
ORAI2	0.238275	5.33752	4.88788	0.000703331	0.00232809	-1.63319
CCDC9	0.317701	4.83714	4.87705	0.000714496	0.00236154	-1.59553
TP53BP1	0.410737	6.21688	4.87694	0.000714602	0.00236154	-1.72642
NINJ1	0.439205	4.10043	4.87691	0.000714634	0.00236154	-1.48188
KIAA0930	0.298439	8.05086	4.87653	0.000715036	0.0023623	-1.81265
AMZ2	0.316517	5.69015	4.87562	0.000715978	0.00236485	-1.68554
RBM15B	0.211158	6.44971	4.87373	0.00071795	0.0023708	-1.74595
GLIPR2	1.30141	-0.803139	4.87131	0.000720478	0.00237744	-0.589784
ZNF765	0.499846	2.82608	4.86977	0.000722097	0.00238221	-1.23391
EIF4G2	0.430807	9.78549	4.86819	0.000723761	0.00238599	-1.86355
MOB3B	0.389426	5.59852	4.86543	0.000726677	0.00239446	-1.6929
TWISTNB	0.423436	5.51346	4.86319	0.000729048	0.0024017	-1.68842
KIAA1143	0.307858	5.26906	4.85958	0.000732898	0.00241266	-1.67023
ZFP28	0.589624	2.64833	4.8561	0.000736622	0.00242376	-1.21947
NPL	0.454033	2.86684	4.85551	0.000737251	0.00242526	-1.26419
PRKCE	0.621414	5.47345	4.85423	0.000738626	0.00242804	-1.6985
FBXW5	0.407079	7.33215	4.85224	0.000740777	0.00243338	-1.82568
TAF9B	0.260074	4.67704	4.84758	0.000745828	0.00244813	-1.62012
LRRC37A3	0.85908	0.350774	4.84556	0.000748027	0.00245427	-0.812459
CNIH1	0.208136	6.39497	4.84486	0.000748794	0.00245621	-1.78755
FOXRED1	0.366242	5.75814	4.84244	0.000751445	0.00246315	-1.74319
RBKS	0.729794	-0.580371	4.84094	0.000753089	0.00246737	-0.669042
GPR153	0.329054	6.72745	4.84026	0.000753836	0.00246923	-1.81344
SLC12A2	0.356153	5.41944	4.83842	0.000755866	0.00247529	-1.71793
EMBP1	0.732385	0.652892	4.83821	0.000756092	0.00247545	-0.876724
RAVER2	0.43148	3.7484	4.83489	0.000759774	0.00248514	-1.47966
BRIP1	0.682922	4.65555	4.83086	0.000764256	0.00249762	-1.64309
TMEM56-RWDD3	0.74168	0.783683	4.83081	0.000764313	0.00249762	-0.911523
VPS13C	0.797277	5.14898	4.8281	0.000767346	0.00250576	-1.70686
FAM101B	0.21236	7.22511	4.82418	0.000771754	0.00251956	-1.86433
PPP3CC	0.308619	3.8145	4.82348	0.000772547	0.00252095	-1.5107
SCART1	0.937386	-0.0652033	4.82303	0.000773057	0.00252202	-0.777283
ZNF264	0.462626	3.6499	4.82004	0.000776437	0.00253125	-1.48263
RAB35	0.240114	6.55753	4.81783	0.000778955	0.00253707	-1.83902
NFATC4	1.7833	-1.03654	4.81585	0.000781212	0.00254228	-0.640833
NOL3	0.445623	4.38135	4.81582	0.000781254	0.00254228	-1.62465
PLK3	0.419239	4.57152	4.81217	0.000785438	0.00255397	-1.65984
FUS	0.244533	8.84244	4.80874	0.000789384	0.00256559	-1.93694
CASP7	0.310717	4.30593	4.80763	0.000790673	0.00256877	-1.62513
IMMT	0.189511	7.36162	4.80758	0.000790735	0.00256877	-1.89651
ZNF441	0.638449	2.99148	4.80559	0.000793034	0.00257503	-1.36701
WARS2	0.339527	4.49095	4.805	0.000793727	0.00257667	-1.65893
CSNK1G1	0.563829	4.77142	4.80431	0.000794527	0.00257867	-1.70006
NUDT13	0.875845	-0.798269	4.80361	0.000795348	0.00258072	-0.693744
TBK1	0.36898	5.30436	4.80276	0.000796338	0.00258262	-1.76219
AMBRA1	0.223595	5.46425	4.80262	0.000796494	0.00258262	-1.77797
FCN1	0.727435	0.0361186	4.80055	0.000798914	0.00258986	-0.828471
TMOD3	0.520014	6.32351	4.79685	0.000803265	0.00260214	-1.85795
UBP1	0.362315	6.86821	4.79333	0.000807414	0.00261373	-1.89415
PRDX1	0.256107	9.27757	4.78864	0.000812989	0.00263046	-1.97767
PTP4A2	0.268322	8.04085	4.78831	0.000813387	0.00263061	-1.94975
KRBA1	0.66742	2.33708	4.78774	0.000814062	0.00263217	-1.26375
STS	0.482632	3.75576	4.78707	0.000814868	0.00263416	-1.55561
C9orf72	0.42611	2.97901	4.78526	0.00081704	0.0026395	-1.39612
ARFGAP2	0.264437	6.32812	4.78518	0.000817136	0.0026395	-1.87647
PMAIP1	0.410278	2.84707	4.78502	0.000817319	0.0026395	-1.36966
GPR85	0.372092	4.62896	4.78443	0.000818036	0.00264069	-1.71162
ANKDD1A	0.402365	3.06794	4.77992	0.000823465	0.00265512	-1.42275
ZNF155	0.738375	0.835784	4.77861	0.000825056	0.00265901	-1.00157
PYROXD2	0.707352	0.611309	4.77751	0.000826384	0.00266182	-0.962976
GHR	0.647701	2.52284	4.77741	0.000826508	0.00266182	-1.31662
ZNF106	0.752158	7.00089	4.7765	0.000827614	0.00266476	-1.92749
MBLAC1	0.521103	2.17138	4.77461	0.000829916	0.00267093	-1.25191
[truncated: 11,814 more rows]
