# Supplementary material for: Analysis of Alternative mRNA Splicing in Vemurafenib-Resistant Melanoma Cells
Source: Biomolecules. 2022 Jul 17;12(7):993. doi: 10.3390/biom12070993 (PMC9312936; doi:10.3390/biom12070993)
Supplement: Supplementary file 1 [file biomolecules-12-00993-s001.zip › Table S3 - BRAF interactome MS data.xlsx]

## Sheet: Description
Supplemental Table S3 Affinity Purification Mass Spectrometry BRAF interactome analysis data Sheet 2 - BRAF immunoprecipitation vs IgG control for resistant cells Sheet 3 - BRAF immunoprecipitation vs IgG control for parental cells p-value cut-off < 0.05, Difference > 0 Columns - -log P-value Difference Protein IDs - Uniprot Protein names Genes - HGNC symbol First Protein Description

## Sheet: BRAF IP vs IgG PAR
-log P-value	Difference	Protein IDs	Protein Names	Genes	First Protein Description
6.77814	4.17556	A0MZ66;A0MZ66-3;A0MZ66-5;A0MZ66-6;A0MZ66-7	SHOT1_HUMAN	SHTN1	Shootin-1
1.99706	1.59188	O00567	NOP56_HUMAN	NOP56	Nucleolar protein 56
2.66112	2.22101	O14513	NCKP5_HUMAN	NCKAP5	Nck-associated protein 5
3.04372	1.95534	O43324;O43324-2	MCA3_HUMAN	EEF1E1	Eukaryotic translation elongation factor 1 epsilon-1
2.13001	1.40874	O43795;O43795-2	MYO1B_HUMAN	MYO1B	Unconventional myosin-Ib
2.64224	1.83626	O75506	HSBP1_HUMAN	HSBP1	Heat shock factor-binding protein 1
3.5207	2.22775	O94766;Q9NPZ5	B3GA3_HUMAN	B3GAT3	Galactosylgalactosylxylosylprotein 3-beta-glucuronosyltransferase 3
4.82926	1.82276	O94986;O94986-1;O94986-2;O94986-3	CE152_HUMAN	CEP152	Centrosomal protein of 152 kDa
3.09124	2.82518	O95613;O95613-2	PCNT_HUMAN	PCNT	Pericentrin
2.99609	2.61559	P01023;P20742;P20742-2	A2MG_HUMAN	A2M	Alpha-2-macroglobulin
1.7805	1.94792	P04004	VTNC_HUMAN	VTN	Vitronectin
4.12499	2.08386	P07814	SYEP_HUMAN	EPRS1	Bifunctional glutamate/proline--tRNA ligase
2.06612	1.33151	P07910;P07910-2;P07910-3;P07910-4	HNRPC_HUMAN	HNRNPC	Heterogeneous nuclear ribonucleoproteins C1/C2
7.51356	2.98598	O43790;O95678;P02538;P04259;P05787;P05787-2;P08670;P08729;P12035;P13647;P14136;P14136-2;P14136-3;P48668;P78385;P78386;Q01546;Q14533;Q5XKE5;Q8N1N4;Q8N1N4-2;Q9NSB2	VIME_HUMAN	VIM	Vimentin
2.84418	1.5714	P08779	K1C16_HUMAN	KRT16	Keratin, type I cytoskeletal 16
4.81777	3.10293	P12270;P12270-2	TPR_HUMAN	TPR	Nucleoprotein TPR
2.85765	3.14243	P13861;P13861-2	KAP2_HUMAN	PRKAR2A	cAMP-dependent protein kinase type II-alpha regulatory subunit
6.73494	4.99559	P14373;P14373-2	TRI27_HUMAN	TRIM27	Zinc finger protein RFP
3.94982	1.8375	P14868;P14868-2	SYDC_HUMAN	DARS1	Aspartate--tRNA ligase, cytoplasmic
8.40771	7.21538	P04049;P04049-2;P10398;P15056	BRAF_HUMAN	BRAF	Serine/threonine-protein kinase B-raf
1.34754	1.3229	P16401	H15_HUMAN	H1-5	Histone H1.5
1.86917	1.62973	P17612;P17612-2	KAPCA_HUMAN	PRKACA	cAMP-dependent protein kinase catalytic subunit alpha
2.32535	1.14454	P20700	LMNB1_HUMAN	LMNB1	Lamin-B1
1.6059	1.37852	P20742	PZP_HUMAN	PZP	Pregnancy zone protein
1.80524	1.73108	P22087	FBRL_HUMAN	FBL	rRNA 2'-O-methyltransferase fibrillarin
4.50729	3.26111	P23246;P23246-2	SFPQ_HUMAN	SFPQ	Splicing factor, proline- and glutamine-rich
1.90003	1.35728	P31323	KAP3_HUMAN	PRKAR2B	cAMP-dependent protein kinase type II-beta regulatory subunit
1.53631	1.46933	P31946;P31946-2	1433B_HUMAN	YWHAB	14-3-3 protein beta/alpha
1.44647	2.61394	P31947;P31947-2	1433S_HUMAN	SFN	14-3-3 protein sigma
1.92402	1.58952	P35580;P35580-2;P35580-3;P35580-4;P35580-5;P35749;P35749-2;P35749-3;P35749-4;Q7Z406;Q7Z406-2;Q7Z406-4;Q7Z406-5;Q7Z406-6	MYH10_HUMAN	MYH10	Myosin-10
2.31906	1.92323	P35637;P35637-2	FUS_HUMAN	FUS	RNA-binding protein FUS
1.87765	1.21994	P39023	RL3_HUMAN	RPL3	60S ribosomal protein L3
2.31693	1.51292	P40967;P40967-2;P40967-3;P40967-4;P40967-5	PMEL_HUMAN	PMEL	Melanocyte protein PMEL
5.88482	2.6648	P41252	SYIC_HUMAN	IARS1	Isoleucine--tRNA ligase, cytoplasmic
1.96004	1.71122	P46087;P46087-2;P46087-3;P46087-4	NOP2_HUMAN	NOP2	Probable 28S rRNA (cytosine(4447)-C(5))-methyltransferase
5.78543	2.18805	P48681	NEST_HUMAN	NES	Nestin
3.95066	2.27974	P50454	SERPH_HUMAN	SERPINH1	Serpin H1
1.80958	1.76175	P51114;P51114-2;P51114-3;P51116;Q06787;Q06787-2;Q06787-3;Q06787-4;Q06787-5;Q06787-6;Q06787-7;Q06787-8;Q06787-9	FXR1_HUMAN	FXR1	Fragile X mental retardation syndrome-related protein 1
2.01415	1.37486	P54136;P54136-2	SYRC_HUMAN	RARS1	Arginine--tRNA ligase, cytoplasmic
3.75652	1.71381	P56192	SYMC_HUMAN	MARS1	Methionine--tRNA ligase, cytoplasmic
2.09732	1.24621	P57740	NU107_HUMAN	NUP107	Nuclear pore complex protein Nup107
3.28255	2.37433	P61981	1433G_HUMAN	YWHAG	14-3-3 protein gamma
4.13191	1.80881	P62258;P62258-2	1433E_HUMAN	YWHAE	14-3-3 protein epsilon
7.6976	1.88429	P63104;P63104-2	1433Z_HUMAN	YWHAZ	14-3-3 protein zeta/delta
2.0504	1.36927	P63167;Q96FJ2	DYL1_HUMAN	DYNLL1	Dynein light chain 1, cytoplasmic
5.3463	3.04046	Q04917	1433F_HUMAN	YWHAH	14-3-3 protein eta
2.44623	1.38039	Q07065	CKAP4_HUMAN	CKAP4	Cytoskeleton-associated protein 4
2.02212	1.13006	Q12904;Q12904-2	AIMP1_HUMAN	AIMP1	Aminoacyl tRNA synthase complex-interacting multifunctional protein 1
3.71303	1.91879	Q13136;Q13136-2	LIPA1_HUMAN	PPFIA1	Liprin-alpha-1
3.41047	2.01183	Q13155;Q13155-2	AIMP2_HUMAN	AIMP2	Aminoacyl tRNA synthase complex-interacting multifunctional protein 2
2.07999	3.33469	Q13439;Q13439-3;Q13439-4;Q13439-5	GOGA4_HUMAN	GOLGA4	Golgin subfamily A member 4
2.90979	1.51913	Q14141;Q14141-2;Q14141-3;Q14141-4	SEPT6_HUMAN	SEPTIN6	Septin-6
1.97038	1.27232	Q14690	RRP5_HUMAN	PDCD11	Protein RRP5 homolog
1.91635	3.01433	Q14789;Q14789-2;Q14789-3;Q14789-4	GOGB1_HUMAN	GOLGB1	Isoform 2 of Golgin subfamily B member 1
3.39849	3.46861	Q15019;Q15019-2;Q15019-3	SEPT2_HUMAN	SEPTIN2	Septin-2
2.18429	1.78563	Q15046;Q15046-2	SYK_HUMAN	KARS1	Lysine--tRNA ligase
9.57	5.55061	Q15154;Q15154-2;Q15154-3;Q15154-4;Q15154-5	PCM1_HUMAN	PCM1	Isoform 5 of Pericentriolar material 1 protein
6.70597	3.25808	Q15233;Q15233-2	NONO_HUMAN	NONO	Non-POU domain-containing octamer-binding protein
2.66155	3.53114	Q16181;Q16181-2;Q6ZU15	SEPT7_HUMAN	SEPTIN7	Septin-7
2.18141	1.3265	Q1KMD3	HNRL2_HUMAN	HNRNPUL2	Heterogeneous nuclear ribonucleoprotein U-like protein 2
1.91058	1.51663	Q2TAY7	SMU1_HUMAN	SMU1	WD40 repeat-containing protein SMU1
4.27902	7.50093	Q5JTD0;Q5JTD0-2;Q5JTD0-4	TJAP1_HUMAN	TJAP1	Isoform 2 of Tight junction-associated protein 1
2.63466	1.33942	Q5SSJ5;Q5SSJ5-2	HP1B3_HUMAN	HP1BP3	Heterochromatin protein 1-binding protein 3
3.58213	1.85071	Q5SW79;Q5SW79-2;Q5SW79-3	CE170_HUMAN	CEP170	Centrosomal protein of 170 kDa
6.42526	3.63127	Q5VTR2	BRE1A_HUMAN	RNF20	E3 ubiquitin-protein ligase BRE1A
1.89841	1.89033	Q68CZ1;Q68CZ1-2	FTM_HUMAN	RPGRIP1L	Protein fantom
1.8162	1.4849	Q6DKI1	RL7L_HUMAN	RPL7L1	60S ribosomal protein L7-like 1
2.59777	2.08019	Q86SE5;Q86SE5-3	RALYL_HUMAN	RALYL	RNA-binding Raly-like protein
5.80799	2.86358	Q86UP2;Q86UP2-2;Q86UP2-3;Q86UP2-4	KTN1_HUMAN	KTN1	Kinectin
2.08054	1.65552	Q8NC51;Q8NC51-2;Q8NC51-3;Q8NC51-4	PAIRB_HUMAN	SERBP1	Plasminogen activator inhibitor 1 RNA-binding protein
4.12069	3.53926	Q8WXF1;Q8WXF1-2	PSPC1_HUMAN	PSPC1	Paraspeckle component 1
3.88025	2.10688	Q96AG3;Q96AG3-2	S2546_HUMAN	SLC25A46	Solute carrier family 25 member 46
4.86417	2.57966	Q96CN4;Q96CN4-2	EVI5L_HUMAN	EVI5L	EVI5-like protein
7.22618	4.99653	Q96CN9	GCC1_HUMAN	GCC1	GRIP and coiled-coil domain-containing protein 1
5.54699	2.74225	Q96EA4;Q96EA4-3	SPDLY_HUMAN	SPDL1	Protein Spindly
4.8067	2.42718	Q96MT8;Q96MT8-2;Q96MT8-3;Q96MT8-4	CEP63_HUMAN	CEP63	Centrosomal protein of 63 kDa
1.64257	2.10841	Q99996;Q99996-1;Q99996-3;Q99996-5;Q99996-6	AKAP9_HUMAN	AKAP9	Isoform 3 of A-kinase anchor protein 9
4.37689	2.34778	Q9BV73;Q9BV73-2	CP250_HUMAN	CEP250	Centrosome-associated protein CEP250
5.86217	2.30445	Q9BVK6	TMED9_HUMAN	TMED9	Transmembrane emp24 domain-containing protein 9
2.05947	2.02476	Q9BVP2;Q9BVP2-2	GNL3_HUMAN	GNL3	Guanine nucleotide-binding protein-like 3
2.00855	1.18456	Q9H0S4;Q9H0S4-2	DDX47_HUMAN	DDX47	Probable ATP-dependent RNA helicase DDX47
8.16272	5.78502	Q9H2S9;Q9H2S9-2	IKZF4_HUMAN	IKZF4	Zinc finger protein Eos
1.69942	1.27423	Q9H307	PININ_HUMAN	PNN	Pinin
2.54216	1.27395	Q9HAU0;Q9HAU0-2;Q9HAU0-3;Q9HAU0-4;Q9HAU0-5;Q9HAU0-6;Q9HAU0-8	PKHA5_HUMAN	PLEKHA5	Pleckstrin homology domain-containing family A member 5
2.04739	1.33763	Q9NR30;Q9NR30-2	DDX21_HUMAN	DDX21	Nucleolar RNA helicase 2
3.41491	3.12195	Q14141;Q14141-2;Q14141-4;Q92599;Q92599-2;Q92599-3;Q92599-4;Q9NVA2;Q9NVA2-2	SEP11_HUMAN	SEPTIN11	Septin-11
3.9807	1.64375	Q5T9A4;Q5T9A4-2;Q5T9A4-3;Q9NVI7;Q9NVI7-2;Q9NVI7-3	ATD3A_HUMAN	ATAD3A	ATPase family AAA domain-containing protein 3A
1.73589	1.63236	Q9NZ43;Q9NZ43-2	USE1_HUMAN	USE1	Vesicle transport protein USE1
4.77805	2.99625	Q9P0V9;Q9P0V9-2;Q9P0V9-3	SEP10_HUMAN	SEPTIN10	Septin-10
4.20792	3.05556	Q9UHD8;Q9UHD8-2;Q9UHD8-3;Q9UHD8-4;Q9UHD8-5;Q9UHD8-7;Q9UHD8-8;Q9UHD8-9	SEPT9_HUMAN	SEPTIN9	Septin-9
5.51244	2.81008	Q9UPN4;Q9UPN4-2;Q9UPN4-3	CP131_HUMAN	CEP131	Centrosomal protein of 131 kDa
5.08275	3.23672	Q9Y250;Q9Y250-2;Q9Y250-3;Q9Y250-4;Q9Y250-5	LZTS1_HUMAN	LZTS1	Leucine zipper putative tumor suppressor 1
2.3668	1.75153	Q9Y2D8;Q9Y2D8-2;Q9Y2D8-3	ADIP_HUMAN	SSX2IP	Afadin- and alpha-actinin-binding protein
1.33561	1.71385	Q9Y2X3	NOP58_HUMAN	NOP58	Nucleolar protein 58
2.14048	1.47924	Q9Y3B9	RRP15_HUMAN	RRP15	RRP15-like protein
2.22018	1.2712	Q9Y3U8	RL36_HUMAN	RPL36	60S ribosomal protein L36
1.87327	2.37284	Q9Y4L1;Q9Y4L1-2	HYOU1_HUMAN	HYOU1	Hypoxia up-regulated protein 1

## Sheet: BRAF IP vs IgG RES
-log P-value	Difference	Protein IDs	Protein Names	Genes	First Protein Description
6.77814	4.17556	A0MZ66;A0MZ66-3;A0MZ66-5;A0MZ66-6;A0MZ66-7	SHOT1_HUMAN	SHTN1	Shootin-1
1.99706	1.59188	O00567	NOP56_HUMAN	NOP56	Nucleolar protein 56
2.66112	2.22101	O14513	NCKP5_HUMAN	NCKAP5	Nck-associated protein 5
3.04372	1.95534	O43324;O43324-2	MCA3_HUMAN	EEF1E1	Eukaryotic translation elongation factor 1 epsilon-1
2.13001	1.40874	O43795;O43795-2	MYO1B_HUMAN	MYO1B	Unconventional myosin-Ib
2.64224	1.83626	O75506	HSBP1_HUMAN	HSBP1	Heat shock factor-binding protein 1
3.5207	2.22775	O94766;Q9NPZ5	B3GA3_HUMAN	B3GAT3	Galactosylgalactosylxylosylprotein 3-beta-glucuronosyltransferase 3
4.82926	1.82276	O94986;O94986-1;O94986-2;O94986-3	CE152_HUMAN	CEP152	Centrosomal protein of 152 kDa
3.09124	2.82518	O95613;O95613-2	PCNT_HUMAN	PCNT	Pericentrin
2.99609	2.61559	P01023;P20742;P20742-2	A2MG_HUMAN	A2M	Alpha-2-macroglobulin
1.7805	1.94792	P04004	VTNC_HUMAN	VTN	Vitronectin
4.12499	2.08386	P07814	SYEP_HUMAN	EPRS1	Bifunctional glutamate/proline--tRNA ligase
2.06612	1.33151	P07910;P07910-2;P07910-3;P07910-4	HNRPC_HUMAN	HNRNPC	Heterogeneous nuclear ribonucleoproteins C1/C2
7.51356	2.98598	O43790;O95678;P02538;P04259;P05787;P05787-2;P08670;P08729;P12035;P13647;P14136;P14136-2;P14136-3;P48668;P78385;P78386;Q01546;Q14533;Q5XKE5;Q8N1N4;Q8N1N4-2;Q9NSB2	VIME_HUMAN	VIM	Vimentin
2.84418	1.5714	P08779	K1C16_HUMAN	KRT16	Keratin, type I cytoskeletal 16
4.81777	3.10293	P12270;P12270-2	TPR_HUMAN	TPR	Nucleoprotein TPR
2.85765	3.14243	P13861;P13861-2	KAP2_HUMAN	PRKAR2A	cAMP-dependent protein kinase type II-alpha regulatory subunit
6.73494	4.99559	P14373;P14373-2	TRI27_HUMAN	TRIM27	Zinc finger protein RFP
3.94982	1.8375	P14868;P14868-2	SYDC_HUMAN	DARS1	Aspartate--tRNA ligase, cytoplasmic
8.40771	7.21538	P04049;P04049-2;P10398;P15056	BRAF_HUMAN	BRAF	Serine/threonine-protein kinase B-raf
1.34754	1.3229	P16401	H15_HUMAN	H1-5	Histone H1.5
1.86917	1.62973	P17612;P17612-2	KAPCA_HUMAN	PRKACA	cAMP-dependent protein kinase catalytic subunit alpha
2.32535	1.14454	P20700	LMNB1_HUMAN	LMNB1	Lamin-B1
1.6059	1.37852	P20742	PZP_HUMAN	PZP	Pregnancy zone protein
1.80524	1.73108	P22087	FBRL_HUMAN	FBL	rRNA 2'-O-methyltransferase fibrillarin
4.50729	3.26111	P23246;P23246-2	SFPQ_HUMAN	SFPQ	Splicing factor, proline- and glutamine-rich
1.90003	1.35728	P31323	KAP3_HUMAN	PRKAR2B	cAMP-dependent protein kinase type II-beta regulatory subunit
1.53631	1.46933	P31946;P31946-2	1433B_HUMAN	YWHAB	14-3-3 protein beta/alpha
1.44647	2.61394	P31947;P31947-2	1433S_HUMAN	SFN	14-3-3 protein sigma
1.92402	1.58952	P35580;P35580-2;P35580-3;P35580-4;P35580-5;P35749;P35749-2;P35749-3;P35749-4;Q7Z406;Q7Z406-2;Q7Z406-4;Q7Z406-5;Q7Z406-6	MYH10_HUMAN	MYH10	Myosin-10
2.31906	1.92323	P35637;P35637-2	FUS_HUMAN	FUS	RNA-binding protein FUS
1.87765	1.21994	P39023	RL3_HUMAN	RPL3	60S ribosomal protein L3
2.31693	1.51292	P40967;P40967-2;P40967-3;P40967-4;P40967-5	PMEL_HUMAN	PMEL	Melanocyte protein PMEL
5.88482	2.6648	P41252	SYIC_HUMAN	IARS1	Isoleucine--tRNA ligase, cytoplasmic
1.96004	1.71122	P46087;P46087-2;P46087-3;P46087-4	NOP2_HUMAN	NOP2	Probable 28S rRNA (cytosine(4447)-C(5))-methyltransferase
5.78543	2.18805	P48681	NEST_HUMAN	NES	Nestin
3.95066	2.27974	P50454	SERPH_HUMAN	SERPINH1	Serpin H1
1.80958	1.76175	P51114;P51114-2;P51114-3;P51116;Q06787;Q06787-2;Q06787-3;Q06787-4;Q06787-5;Q06787-6;Q06787-7;Q06787-8;Q06787-9	FXR1_HUMAN	FXR1	Fragile X mental retardation syndrome-related protein 1
2.01415	1.37486	P54136;P54136-2	SYRC_HUMAN	RARS1	Arginine--tRNA ligase, cytoplasmic
3.75652	1.71381	P56192	SYMC_HUMAN	MARS1	Methionine--tRNA ligase, cytoplasmic
2.09732	1.24621	P57740	NU107_HUMAN	NUP107	Nuclear pore complex protein Nup107
3.28255	2.37433	P61981	1433G_HUMAN	YWHAG	14-3-3 protein gamma
4.13191	1.80881	P62258;P62258-2	1433E_HUMAN	YWHAE	14-3-3 protein epsilon
7.6976	1.88429	P63104;P63104-2	1433Z_HUMAN	YWHAZ	14-3-3 protein zeta/delta
2.0504	1.36927	P63167;Q96FJ2	DYL1_HUMAN	DYNLL1	Dynein light chain 1, cytoplasmic
5.3463	3.04046	Q04917	1433F_HUMAN	YWHAH	14-3-3 protein eta
2.44623	1.38039	Q07065	CKAP4_HUMAN	CKAP4	Cytoskeleton-associated protein 4
2.02212	1.13006	Q12904;Q12904-2	AIMP1_HUMAN	AIMP1	Aminoacyl tRNA synthase complex-interacting multifunctional protein 1
3.71303	1.91879	Q13136;Q13136-2	LIPA1_HUMAN	PPFIA1	Liprin-alpha-1
3.41047	2.01183	Q13155;Q13155-2	AIMP2_HUMAN	AIMP2	Aminoacyl tRNA synthase complex-interacting multifunctional protein 2
2.07999	3.33469	Q13439;Q13439-3;Q13439-4;Q13439-5	GOGA4_HUMAN	GOLGA4	Golgin subfamily A member 4
2.90979	1.51913	Q14141;Q14141-2;Q14141-3;Q14141-4	SEPT6_HUMAN	SEPTIN6	Septin-6
1.97038	1.27232	Q14690	RRP5_HUMAN	PDCD11	Protein RRP5 homolog
1.91635	3.01433	Q14789;Q14789-2;Q14789-3;Q14789-4	GOGB1_HUMAN	GOLGB1	Isoform 2 of Golgin subfamily B member 1
3.39849	3.46861	Q15019;Q15019-2;Q15019-3	SEPT2_HUMAN	SEPTIN2	Septin-2
2.18429	1.78563	Q15046;Q15046-2	SYK_HUMAN	KARS1	Lysine--tRNA ligase
9.57	5.55061	Q15154;Q15154-2;Q15154-3;Q15154-4;Q15154-5	PCM1_HUMAN	PCM1	Isoform 5 of Pericentriolar material 1 protein
6.70597	3.25808	Q15233;Q15233-2	NONO_HUMAN	NONO	Non-POU domain-containing octamer-binding protein
2.66155	3.53114	Q16181;Q16181-2;Q6ZU15	SEPT7_HUMAN	SEPTIN7	Septin-7
2.18141	1.3265	Q1KMD3	HNRL2_HUMAN	HNRNPUL2	Heterogeneous nuclear ribonucleoprotein U-like protein 2
1.91058	1.51663	Q2TAY7	SMU1_HUMAN	SMU1	WD40 repeat-containing protein SMU1
4.27902	7.50093	Q5JTD0;Q5JTD0-2;Q5JTD0-4	TJAP1_HUMAN	TJAP1	Isoform 2 of Tight junction-associated protein 1
2.63466	1.33942	Q5SSJ5;Q5SSJ5-2	HP1B3_HUMAN	HP1BP3	Heterochromatin protein 1-binding protein 3
3.58213	1.85071	Q5SW79;Q5SW79-2;Q5SW79-3	CE170_HUMAN	CEP170	Centrosomal protein of 170 kDa
6.42526	3.63127	Q5VTR2	BRE1A_HUMAN	RNF20	E3 ubiquitin-protein ligase BRE1A
1.89841	1.89033	Q68CZ1;Q68CZ1-2	FTM_HUMAN	RPGRIP1L	Protein fantom
1.8162	1.4849	Q6DKI1	RL7L_HUMAN	RPL7L1	60S ribosomal protein L7-like 1
2.59777	2.08019	Q86SE5;Q86SE5-3	RALYL_HUMAN	RALYL	RNA-binding Raly-like protein
5.80799	2.86358	Q86UP2;Q86UP2-2;Q86UP2-3;Q86UP2-4	KTN1_HUMAN	KTN1	Kinectin
2.08054	1.65552	Q8NC51;Q8NC51-2;Q8NC51-3;Q8NC51-4	PAIRB_HUMAN	SERBP1	Plasminogen activator inhibitor 1 RNA-binding protein
4.12069	3.53926	Q8WXF1;Q8WXF1-2	PSPC1_HUMAN	PSPC1	Paraspeckle component 1
3.88025	2.10688	Q96AG3;Q96AG3-2	S2546_HUMAN	SLC25A46	Solute carrier family 25 member 46
4.86417	2.57966	Q96CN4;Q96CN4-2	EVI5L_HUMAN	EVI5L	EVI5-like protein
7.22618	4.99653	Q96CN9	GCC1_HUMAN	GCC1	GRIP and coiled-coil domain-containing protein 1
5.54699	2.74225	Q96EA4;Q96EA4-3	SPDLY_HUMAN	SPDL1	Protein Spindly
4.8067	2.42718	Q96MT8;Q96MT8-2;Q96MT8-3;Q96MT8-4	CEP63_HUMAN	CEP63	Centrosomal protein of 63 kDa
1.64257	2.10841	Q99996;Q99996-1;Q99996-3;Q99996-5;Q99996-6	AKAP9_HUMAN	AKAP9	Isoform 3 of A-kinase anchor protein 9
4.37689	2.34778	Q9BV73;Q9BV73-2	CP250_HUMAN	CEP250	Centrosome-associated protein CEP250
5.86217	2.30445	Q9BVK6	TMED9_HUMAN	TMED9	Transmembrane emp24 domain-containing protein 9
2.05947	2.02476	Q9BVP2;Q9BVP2-2	GNL3_HUMAN	GNL3	Guanine nucleotide-binding protein-like 3
2.00855	1.18456	Q9H0S4;Q9H0S4-2	DDX47_HUMAN	DDX47	Probable ATP-dependent RNA helicase DDX47
8.16272	5.78502	Q9H2S9;Q9H2S9-2	IKZF4_HUMAN	IKZF4	Zinc finger protein Eos
1.69942	1.27423	Q9H307	PININ_HUMAN	PNN	Pinin
2.54216	1.27395	Q9HAU0;Q9HAU0-2;Q9HAU0-3;Q9HAU0-4;Q9HAU0-5;Q9HAU0-6;Q9HAU0-8	PKHA5_HUMAN	PLEKHA5	Pleckstrin homology domain-containing family A member 5
2.04739	1.33763	Q9NR30;Q9NR30-2	DDX21_HUMAN	DDX21	Nucleolar RNA helicase 2
3.41491	3.12195	Q14141;Q14141-2;Q14141-4;Q92599;Q92599-2;Q92599-3;Q92599-4;Q9NVA2;Q9NVA2-2	SEP11_HUMAN	SEPTIN11	Septin-11
3.9807	1.64375	Q5T9A4;Q5T9A4-2;Q5T9A4-3;Q9NVI7;Q9NVI7-2;Q9NVI7-3	ATD3A_HUMAN	ATAD3A	ATPase family AAA domain-containing protein 3A
1.73589	1.63236	Q9NZ43;Q9NZ43-2	USE1_HUMAN	USE1	Vesicle transport protein USE1
4.77805	2.99625	Q9P0V9;Q9P0V9-2;Q9P0V9-3	SEP10_HUMAN	SEPTIN10	Septin-10
4.20792	3.05556	Q9UHD8;Q9UHD8-2;Q9UHD8-3;Q9UHD8-4;Q9UHD8-5;Q9UHD8-7;Q9UHD8-8;Q9UHD8-9	SEPT9_HUMAN	SEPTIN9	Septin-9
5.51244	2.81008	Q9UPN4;Q9UPN4-2;Q9UPN4-3	CP131_HUMAN	CEP131	Centrosomal protein of 131 kDa
5.08275	3.23672	Q9Y250;Q9Y250-2;Q9Y250-3;Q9Y250-4;Q9Y250-5	LZTS1_HUMAN	LZTS1	Leucine zipper putative tumor suppressor 1
2.3668	1.75153	Q9Y2D8;Q9Y2D8-2;Q9Y2D8-3	ADIP_HUMAN	SSX2IP	Afadin- and alpha-actinin-binding protein
1.33561	1.71385	Q9Y2X3	NOP58_HUMAN	NOP58	Nucleolar protein 58
2.14048	1.47924	Q9Y3B9	RRP15_HUMAN	RRP15	RRP15-like protein
2.22018	1.2712	Q9Y3U8	RL36_HUMAN	RPL36	60S ribosomal protein L36
1.87327	2.37284	Q9Y4L1;Q9Y4L1-2	HYOU1_HUMAN	HYOU1	Hypoxia up-regulated protein 1
1.38636	0.739259	O00139;O00139-1;O00139-2;O00139-4;O00139-5	KIF2A_HUMAN	KIF2A	Kinesin-like protein KIF2A
1.99213	1.09507	O00571;O00571-2;O15523;O15523-2;Q9NQI0;Q9NQI0-2;Q9NQI0-3;Q9NQI0-4	DDX3X_HUMAN	DDX3X	ATP-dependent RNA helicase DDX3X
2.48889	1.03834	O14950;P19105;P24844	ML12A_HUMAN;ML12B_HUMAN	MYL12A;MYL12B	Myosin regulatory light chain 12B
2.4604	0.482313	O43143;O60231;Q14562	DHX15_HUMAN	DHX15	Pre-mRNA-splicing factor ATP-dependent RNA helicase DHX15
1.70087	0.628379	O75643;O75643-2	U520_HUMAN	SNRNP200	U5 small nuclear ribonucleoprotein 200 kDa helicase
1.59021	1.20242	O94964;O94964-2;O94964-4	SOGA1_HUMAN	SOGA1	Protein SOGA1
1.33132	1.27311	O95478	NSA2_HUMAN	NSA2	Ribosome biogenesis protein NSA2 homolog
1.40031	0.542726	P02545;P02545-2;P02545-3;P02545-4;P02545-5;P02545-6	LMNA_HUMAN	LMNA	Prelamin-A/C
1.46894	0.350452	P05388;P05388-2;Q8NHW5	RLA0_HUMAN	RPLP0	60S acidic ribosomal protein P0
1.52077	0.721491	P06748;P06748-2;P06748-3	NPM_HUMAN	NPM1	Nucleophosmin
2.2631	0.662913	P17844;P17844-2	DDX5_HUMAN	DDX5	Probable ATP-dependent RNA helicase DDX5
1.64309	0.666543	P18124	RL7_HUMAN	RPL7	60S ribosomal protein L7
2.55298	0.461857	P23396;P23396-2	RS3_HUMAN	RPS3	40S ribosomal protein S3
2.17615	0.53638	P26373;P26373-2	RL13_HUMAN	RPL13	60S ribosomal protein L13
2.46325	0.657143	P30050	RL12_HUMAN	RPL12	60S ribosomal protein L12
3.85233	0.881903	P35579;P35579-2	MYH9_HUMAN	MYH9	Myosin-9
3.48705	0.792183	P36578	RL4_HUMAN	RPL4	60S ribosomal protein L4
1.5742	0.570276	P39019	RS19_HUMAN	RPS19	40S ribosomal protein S19
1.32098	0.438711	P42766	RL35_HUMAN	RPL35	60S ribosomal protein L35
1.6509	1.09629	P46013;P46013-2	KI67_HUMAN	MKI67	Proliferation marker protein Ki-67
1.38475	0.461453	P46776	RL27A_HUMAN	RPL27A	60S ribosomal protein L27a
1.72085	0.558432	P46778	RL21_HUMAN	RPL21	60S ribosomal protein L21
1.5389	0.407564	P46781	RS9_HUMAN	RPS9	40S ribosomal protein S9
1.72388	0.937472	P47897	SYQ_HUMAN	QARS1	Glutamine--tRNA ligase
1.94512	0.809356	P49207	RL34_HUMAN	RPL34	60S ribosomal protein L34
1.61226	0.751651	P52272;P52272-2	HNRPM_HUMAN	HNRNPM	Heterogeneous nuclear ribonucleoprotein M
2.09028	0.622409	P47755;P52907	CAZA1_HUMAN	CAPZA1	F-actin-capping protein subunit alpha-1
1.38453	1.16036	P55769	NH2L1_HUMAN	SNU13	NHP2-like protein 1
1.33334	0.937603	P56182	RRP1_HUMAN	RRP1	Ribosomal RNA processing protein 1 homolog A
1.9197	0.914394	P60660;P60660-2	MYL6_HUMAN	MYL6	Myosin light polypeptide 6
1.54631	0.364625	P60709;P63261	ACTB_HUMAN;ACTG_HUMAN	ACTB;ACTG1	Actin, cytoplasmic 1
1.75055	0.388642	P61247	RS3A_HUMAN	RPS3A	40S ribosomal protein S3a
1.76641	0.986355	P61254;Q9UNX3	RL26_HUMAN	RPL26	60S ribosomal protein L26
1.40825	0.431315	P62241	RS8_HUMAN	RPS8	40S ribosomal protein S8
1.50342	1.01895	P62277	RS13_HUMAN	RPS13	40S ribosomal protein S13
1.57658	0.495704	P62424	RL7A_HUMAN	RPL7A	60S ribosomal protein L7a
1.7532	0.945861	P62847;P62847-2;P62847-3;P62847-4	RS24_HUMAN	RPS24	40S ribosomal protein S24
3.81943	0.740705	P62888	RL30_HUMAN	RPL30	60S ribosomal protein L30
1.42359	0.642357	P62913;P62913-2	RL11_HUMAN	RPL11	60S ribosomal protein L11
3.25125	0.806018	P83731	RL24_HUMAN	RPL24	60S ribosomal protein L24
1.46471	0.531804	Q02878	RL6_HUMAN	RPL6	60S ribosomal protein L6
1.4317	1.24286	Q03701	CEBPZ_HUMAN	CEBPZ	CCAAT/enhancer-binding protein zeta
1.98398	0.677134	Q07020;Q07020-2	RL18_HUMAN	RPL18	60S ribosomal protein L18
1.6317	1.17211	Q08378;Q08378-2	GOGA3_HUMAN	GOLGA3	Golgin subfamily A member 3
1.83013	0.589407	Q14980;Q14980-2;Q14980-3;Q14980-4	NUMA1_HUMAN	NUMA1	Nuclear mitotic apparatus protein 1
2.34636	0.871933	Q15149;Q15149-2;Q15149-3;Q15149-4;Q15149-5;Q15149-6;Q15149-7;Q15149-8;Q15149-9	PLEC_HUMAN	PLEC	Plectin
1.53443	1.23373	Q5TZA2;Q5TZA2-2	CROCC_HUMAN	CROCC	Rootletin
1.60061	0.929679	Q86V81	THOC4_HUMAN	ALYREF	THO complex subunit 4
1.33365	1.0605	Q8NE71;Q8NE71-2	ABCF1_HUMAN	ABCF1	ATP-binding cassette sub-family F member 1
1.73079	1.03819	Q96GQ7	DDX27_HUMAN	DDX27	Probable ATP-dependent RNA helicase DDX27
1.35273	1.14029	Q9NVP1	DDX18_HUMAN	DDX18	ATP-dependent RNA helicase DDX18
1.75234	0.848645	Q9Y2W1	TR150_HUMAN	THRAP3	Thyroid hormone receptor-associated protein 3
1.8143	0.769578	Q9Y6R9;Q9Y6R9-2	CCD61_HUMAN	CCDC61	Centrosomal protein CCDC61
