# Supplementary material for: Analysis of Alternative mRNA Splicing in Vemurafenib-Resistant Melanoma Cells
Source: Biomolecules. 2022 Jul 17;12(7):993. doi: 10.3390/biom12070993 (PMC9312936; doi:10.3390/biom12070993)
Supplement: Supplementary file 1 [file biomolecules-12-00993-s001.zip › Table S5 - RT-PCR primers sequences.pdf]

## Table S5

Table S5. RT-PCR primers sequences.

| Gene Symbol | Primers                                                                                                                                             |
|-------------|-----------------------------------------------------------------------------------------------------------------------------------------------------|
| TYR         | Forward-1:<br>GCTGCCAATTTTCAGCTTTAGAAATAC<br>Reverse-1: AAGAGGACGGTGCCTTCG<br>Forward-2: GCTGCCAATTTTCAGCTTTAGA<br>Reverse-2: GTCATAGCCCAGATCTTTGGA |
| EPB41       | Forward: GAAGACGAGCCACCTGAGC<br>Reverse: GCCCATTGATGTTAAGAGTTTCG                                                                                    |
| CLSTN1      | Forward: CCACCTACCACGGCATAGTC<br>Reverse: GCATCAAAGGGGACATTCTG                                                                                      |
| MPRIIP      | Forward-1: ACCCGGCAACTCAGAAACAT<br>Reverse-1: GACTCTCAGGGGTGTGGTTC<br>Forward-2: CCGGCAACTCAGAAACATC<br>Reverse-2: AAGTCCCTGGATTCAAAGAGC            |
| FANCA       | Forward-1,2: TCCGAGAGGTGTTGAAAGAG<br>Reverse-1: CCAGGTGTAACCAGTCTTGG<br>Reverse-2:<br>CGTTCAGTATCTGAAAGAGCATCA                                      |
| MARK3       | Forward: CATGAAGCCACACCATTTGTC<br>Reverse: AGCCCTCATATCTCCCGTTC                                                                                     |
| EVI5L       | Forward: CTCCTGAAACAGCGGATTG<br>Reverse: CTGTAGCTGCCGGATGGT                                                                                         |
| CAPN3       | Forward-1: GGATCTGTTCTGGTCATCTGG<br>Reverse-1: GCTTTTGCTTATCAGGGCTTG<br>Forward-2:<br>AGGCGATTGGTTTTAGTGGTAG<br>Reverse-2: CTTGTTTGCCTTTGCCCTC      |
| BRAF        | Forward:<br>CCTATGAAGAATACACCAGCAAG<br>Reverse: CTCCATCACCACGAAATCC                                                                                 |
| GAPDH       | Forward: ACCACAGTCCATGCCATCAC<br>Reverse: TCCACCACCCTGTTGCTGTA                                                                                      |
